# Supplementary material for: Enantioselective organocatalytic Michael reactions using chiral (R,R)-1,2-diphenylethylenediamine-derived thioureas
Source: Royal Society of Chemistry journal article supplement (doi:10.1039/d0ra03550e), 2020-01-01
Supplement: d0ra03550e1.pdf [file d0ra03550e1.pdf]

# Supporting Information

## Table of Contents

|                                                                                          |         |
|------------------------------------------------------------------------------------------|---------|
| <b>General Information</b> .....                                                         | S-2     |
| <b>Synthesis of catalysts and products</b> .....                                         | S-2     |
| <b>Compound Characterization Data</b> .....                                              | S-2-6   |
| <b>Copy of HPLC Chromatograms</b> .....                                                  | S-7-18  |
| - Recycling test for asymmetric Michael addition using chiral catalyst 1d (Table 1)..... | S-18    |
| <b>Copy of NMR Spectra</b> .....                                                         | S-18-34 |
| <b>Copy of MASS Spectra</b> .....                                                        | S-34-46 |
| <b>Computational Results of DFT Calculations for all Calculated Structures</b> .....     | S-46-49 |

## General information

IR spectra were recorded on a NICOLET 380 FT-IR spectrophotometer. Optical rotations were measured with a Rudolph Automatic polarimeter (model name: A20766 APV/6w). <sup>1</sup>H NMR spectra were recorded on a Varian Mercury 400 (400 MHz), or Varian Gemini 300 (300 MHz) with TMS as an internal reference. <sup>13</sup>C NMR spectra were recorded on a Varian Mercury 400 (100 MHz) with TMS or CDCl<sub>3</sub> as an internal reference. Chiral HPLC analysis was performed on a Jasco LC-1500 Series HPLC system with a UV detector. All reactions were carried out in oven dried glassware under an argon atmosphere. Toluene (CaH<sub>2</sub>), THF (Na, benzophenone) were dried by distillation before use.

## Synthesis of catalysts (1a-n); general procedure

### 1. Synthesis of monoalkylated thiourea catalysts.

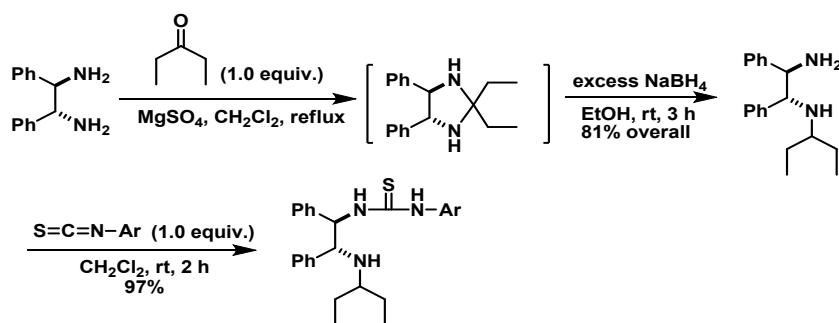

To a suspension of (*R,R*)-1,2-diphenylethylenediamine (1.0 equiv.) in toluene (0.1 M) was added a solution of 3-pentanone (1.1 equiv.), MgSO<sub>4</sub> and the mixture was reflux for 48h. then remove the MgSO<sub>4</sub> to celite filter and concentrated in vacuo. NaBH<sub>4</sub> (4.0 equiv.) and ethanol were added and the mixture was stirred at room temperature for 1h. quenched with 1*N* NaOH solution and the mixture was extracted with ethyl acetate. The combined organic extracts were washed with brine, dried (MgSO<sub>4</sub>),and concentrated in vacuo. The product was purified by chromatography on a silica-gel column (methanol/methylene chloride 1:20). The monoalkylated DPEN (1.0 equiv.) in CH<sub>2</sub>Cl<sub>2</sub> (0.1 M) was added thiourea (1.1 equiv.) and the mixture was stirred at room temperature for 1h. purified by flash column chromatography on silica gel with ethyl acetate/hexanes (1:5) to give the pure amide product(quantitative yield) as a white foamy solid.

### 2. Synthesis of arylated thiourea catalysts.

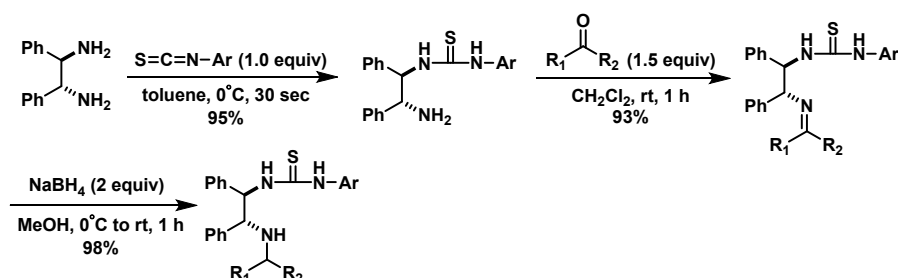

To a suspension of (*R,R*)-1,2-diphenylethylenediamine (1.0 equiv.) in toluene (0.5 M) was added thiourea (1.0 equiv.) at 0°C and the mixture was stirred for 30 sec. the product concentrated in vacuo and purified by flash column chromatography on silica gel with ethyl (methanol/methylene chloride 1:20). The thiourea substituted DPEN (1.0 equiv.) in CH<sub>2</sub>Cl<sub>2</sub> (0.1 M) was added aryl ketone (1.1 equiv.) and the mixture was stirred at room temperature for 1h. NaBH<sub>4</sub>(2.0 equiv.) and ethanol were added at 0°C and the mixture was stirred at room temperature for 1h. and the products celite filter and the mixture was extracted with ethyl acetate. The combined organic extracts were washed with brine, dried (MgSO<sub>4</sub>) and concentrated in vacuo. The product was purified by chromatography on a silica-gel column (methanol/methylene chloride 1:20) to give the pure amide product(quantitative yield) as a brown foamy solid.

### 3. Synthesis of product compounds.

#### General Procedure of the Asymmetric Michael reaction

The β-nitrostyrene (0.4 mmol), malonate (2.0 equiv.) and 10 mol% of **1d** were added in the toluene (0.4 M) and the reaction mixture was stirred at rt. The reaction conversion was monitored by TLC. After completion, ethyl acetate (0.2ml) was added in the reaction mixture. This solution was washed twice with water (2×1.0 mL), dried over magnesium sulfate and concentrated to yield the desired product. The product was purified by chromatography on a silica-gel column (hexanes/ethyl acetate 5:1).

#### General Procedure of recycling test for the Asymmetric Michael reaction using **1d** catalyst

The β-nitrostyrene (67 mmol), malonate (1.5 equiv.) and 5 mol% of **1d** were added in the CH<sub>2</sub>Cl<sub>2</sub> (5ml) and the reaction mixture was stirred at 40 °C. The reaction conversion was monitored by TLC. After completion, CH<sub>2</sub>Cl<sub>2</sub> (0.5ml) was added in the reaction mixture. This solution was washed twice with water (2×3.0 mL), dried over magnesium sulfate and concentrated to yield the desired product. The product was purified by chromatography on a silica-gel column (hexanes/ethyl acetate 5:1). Next purified by flash column chromatography on same silica gel (hexanes/ethyl acetate 1:1) to give the pure **1d** catalyst.

### 4. synthesis of (*R*)-phenibut

Under argon atmosphere, to the suspension of **5e** (1.0 equiv, >99% ee) and NiCl<sub>2</sub>·6H<sub>2</sub>O (1.0 equiv) in MeOH (8.0 ml) was added NaBH<sub>4</sub> (10 equiv) at 0 °C. After the reaction mixture was stirred 7.5 h at rt, the reaction mixture was quenched with NH<sub>4</sub>Cl and diluted with CHCl<sub>3</sub>. The organic layer was separated and dried over MgSO<sub>4</sub>, filtrated and concentrated in vacuo. The residue was purified by column chromatography on silica gel (MeOH/CHCl<sub>3</sub> = 1/20 as eluent) to afford desired product (98%) as colorless powder. The powder (1.0 equiv) in 6*N* HCl (2.7 ml) was refluxed at 100 °C. After 12 h, the reaction mixture was concentrated in vacuo to afford (*R*)-(-)- Phenibut (92%) as colorless solid.

## Compound Characterization Data

### 1-[(1*R*,2*R*)-2-Amino-1,2-diphenylethyl]-3-phenylthiourea (**1a**)

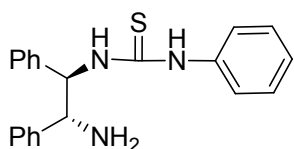

94% yield;  $[\alpha]_D^{20} = +62.0$  ( $c = 0.02$ ,  $\text{CH}_2\text{Cl}_2$ );  $^1\text{H NMR}$  (300 MHz,  $\text{CDCl}_3$ )  $\delta$  7.76 (s, 1 H), 7.54~7.19 (m, 15 H), 5.54 (s, 1 H), 4.42 (d, 1 H,  $J = 5$  Hz), 1.35 (br s, 1 H);  $^{13}\text{C NMR}$  (100 MHz,  $\text{DMSO-d}_6$ )  $\delta$  182.09, 134.48, 133.93, 129.89, 128.70, 128.10, 127.91, 127.15, 126.94, 126.82, 126.74, 126.23, 125.59, 125.24, 122.98, 63.07, 59.09; IR (KBr) 3287.86, 3027.84, 1521.63, 1241.99, 1072.28, 939.20, 698.13  $\text{cm}^{-1}$ ; HRMS (FAB<sup>+</sup>) for  $\text{C}_{21}\text{H}_{22}\text{N}_3\text{S}$   $[\text{M}+\text{H}]^+$  Calcd: 348.1534, Found: 348.1530.

### 1-(4-Nitrophenyl)-3-[(1*R*,2*R*)-2-(pentan-3-ylamino)-1,2-diphenylethyl]thiourea (1b)

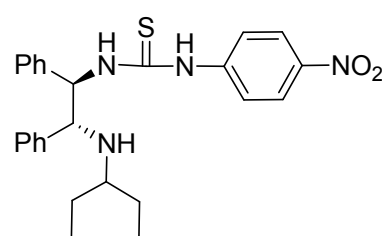

89% yield;  $[\alpha]_D^{20} = +37.7$  ( $c = 0.02$ ,  $\text{CH}_2\text{Cl}_2$ );  $^1\text{H NMR}$  (300 MHz,  $\text{DMSO-d}_6$ )  $\delta$  10.5 (s, 1 H), 8.16 (m, 2 H), 7.90 (d,  $J = 9.1$  Hz, 2 H), 7.37~7.15 (m, 10 H), 5.54 (br s, 1 H), 4.16 (d,  $J = 5.5$  Hz, 1 H), 2.07 (m, 1 H), 1.30~1.15 (m, 4 H), 0.75 (t,  $J = 7.4$  Hz, 3 H), 0.50 (t,  $J = 7.4$  Hz, 3 H);  $^{13}\text{C NMR}$  (100 MHz,  $\text{DMSO-d}_6$ )  $\delta$  180.51, 146.95, 142.46, 141.92, 140.92, 128.68, 128.56, 127.72, 125.16, 120.92, 64.35, 63.80, 56.35, 55.59, 26.70, 23.96, 11.03, 8.61; IR (KBr) 3330.5, 2960.2, 2599.6, 2456.4, 2345.0, 1951.6, 1743.3, 1496.5, 1346.1, 1110.8, 1072.2, 852.4, 700.0, 586.3  $\text{cm}^{-1}$ ; HRMS (FAB<sup>+</sup>) for  $\text{C}_{26}\text{H}_{31}\text{N}_4\text{O}_2\text{S}$   $[\text{M}+\text{H}]^+$  Calcd: 463.2168, Found: 463.2165.

### 1-[(1*R*,2*R*)-2-Amino-1,2-diphenylethyl]-3-[3,5-Bis(trifluoromethyl)phenyl]thiourea (1b)

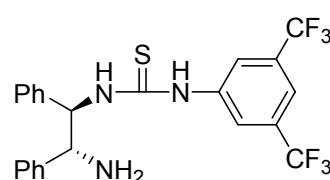

$[\alpha]_D^{25} +13.5$  ( $c = 1.00$ ,  $\text{CH}_3\text{Cl}$ );  $^1\text{H NMR}$  (300 MHz,  $\text{DMSO-d}_6$ )  $\delta$  10.70 (s, 1H), 8.32 (s, 2H), 7.71(s, 1H), 7.22~7.43(m, 13H), 5.57(d,  $J = 3$  Hz, 1H), 4.44 (d,  $J = 3$  Hz, 1H) ppm;  $^{13}\text{C NMR}$  (100 MHz,  $\text{DMSO-d}_6$ )  $\delta$  180.80, 143.41, 142.67, 130.94, 130.62, 128.81, 128.61 127.75, 127.57, 127.51, 125.25, 122.54, 121.68, 116.40, 63.86, 60.06 ppm; IR (KBr) 3305, 3032, 2963, 1652, 1601, 1557, 1383, 1277, 1262, 803, 700  $\text{cm}^{-1}$ ; HRMS (FAB<sup>+</sup>) for  $\text{C}_{23}\text{H}_{19}\text{F}_6\text{N}_3\text{S}$   $[\text{M}+\text{H}]^+$  Calcd: 483.1282, Found: 484.1280

### 1-(4-Fluorophenyl)-3-[(1*R*,2*R*)-2-(pentan-3-ylamino)-1,2-diphenylethyl]thiourea (1c)

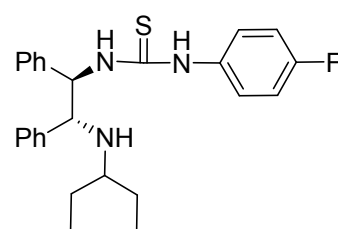

84% yield;  $[\alpha]_D^{20} = +17.9$  ( $c = 0.02$ ,  $\text{CH}_2\text{Cl}_2$ );  $^1\text{H NMR}$  (300 MHz,  $\text{DMSO-d}_6$ )  $\delta$  9.83 (s, 1 H), 8.00 (d,  $J = 6.7$  Hz, 1 H), 7.48~7.43 (m, 2 H), 7.31~7.16 (m, 11 H), 5.46 (br s, 1 H), 4.09 (d,  $J = 5.22$  Hz, 1 H), 2.03 (br s, 1 H), 1.44 (br s, 1 H), 1.14 (m, 4 H), 0.70 (t,  $J = 10.1$ , 3 H), 0.44 (t,  $J = 7.0$  Hz, 3 H);  $^{13}\text{C NMR}$  (100 MHz,  $\text{DMSO-d}_6$ )  $\delta$  181.42, 161.03, 158.62, 141.90, 141.44, 135.97, 128.65, 128.51, 127.57, 127.42, 126.49, 116.13, 115.90, 64.39, 63.76, 56.03, 26.72, 24.02, 10.98, 8.39; IR (KBr) 3193.7, 2962.3, 1889.9, 1511.9, 1218.8, 848.6, 701.9, 555.42  $\text{cm}^{-1}$ ; HRMS (FAB<sup>+</sup>) for  $\text{C}_{26}\text{H}_{31}\text{FN}_3\text{S}$   $[\text{M}+\text{H}]^+$  Calcd: 436.2223, Found: 436.2201

### 1-[3,5-Bis(trifluoromethyl)phenyl]-3-[(1*R*,2*R*)-2-(pentan-3-ylamino)-1,2-diphenylethyl]thiourea (1d)

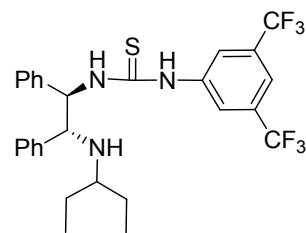

90% yield;  $[\alpha]_D^{20} = +0.31$  ( $c = 0.11$ ,  $\text{CH}_2\text{Cl}_2$ );  $^1\text{H NMR}$  (300 MHz,  $\text{DMSO-d}_6$ )  $\delta$  10.5 (br, 1 H), 8.30 (s, 2 H), 7.74 (s, 1 H), 7.40~7.19 (m, 10 H), 5.57 (br, 1 H), 4.18 (d,  $J = 4.9$  Hz, 1 H), 2.09 (m, 1 H), 1.24~1.20 (m, 4 H), 0.75 (t,  $J = 7.1$  Hz, 3 H), 0.50 (t,  $J = 6.0$  Hz, 3 H);  $^{13}\text{C NMR}$  (100 MHz,  $\text{DMSO-d}_6$ )  $\delta$  181.10, 142.49, 140.88, 130.96, 130.64, 128.70, 128.59, 128.56, 127.60, 125.22, 122.52, 122.19, 116.70, 64.34, 63.62, 56.48, 26.64, 23.90, 10.98, 8.54; IR (KBr) 3239.9, 2964.2, 1471.5, 1278.6, 1135.9, 885.2, 700.1  $\text{cm}^{-1}$ ; HRMS (FAB<sup>+</sup>) for  $\text{C}_{28}\text{H}_{30}\text{F}_6\text{N}_3\text{S}$   $[\text{M}+\text{H}]^+$  Calcd: 554.2065, Found: 554.2020

### 1-[(1*R*,2*R*)-2-(Pentan-3-ylamino)-1,2-diphenylethyl]-3-(*p*-tolyl)thiourea (1e)

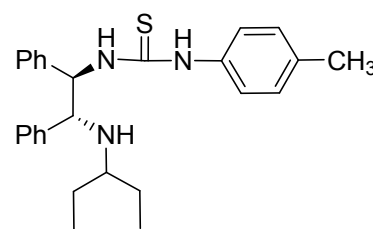

86% yield;  $[\alpha]_D^{20} = +0.19$  ( $c = 1.00$ ,  $\text{CH}_2\text{Cl}_2$ );  $^1\text{H NMR}$  (300 MHz,  $\text{DMSO-d}_6$ )  $\delta$  9.76 (s, 1 H), 7.89 (d,  $J = 7.0$  Hz, 1 H), 7.32~7.18 (m, 14 H), 5.44 (s, 1 H), 4.08 (d,  $J = 5.1$  Hz, 1 H), 2.29 (s, 2 H), 2.02 (s, 1 H), 1.39 (s, 1 H), 1.20~1.06 (m, 4 H), 0.68 (t,  $J = 7.5$  Hz, 3 H), 0.41 (t,  $J = 7.1$  Hz, 3 H);  $^{13}\text{C NMR}$  (100 MHz,  $\text{DMSO-d}_6$ )  $\delta$  181.04, 141.83, 141.55, 136.71, 134.88, 130.03, 128.67, 128.51, 127.49, 127.40, 124.67, 64.28, 63.77, 55.84, 26.71, 24.02, 21.20, 10.94, 8.30; IR (KBr) 3180.2, 2958.4, 1948.8, 1510.1, 1240.1, 821.6, 700.1, 565.1  $\text{cm}^{-1}$ ; HRMS (FAB<sup>+</sup>) for  $\text{C}_{27}\text{H}_{34}\text{N}_3\text{S}$   $[\text{M}+\text{H}]^+$  Calcd: 432.2473, Found: 432.6537, pattern 432.5, 345.3, 266.4, 176.3, 106.01  $\text{cm}^{-1}$ ; HRMS (FAB<sup>+</sup>) for  $\text{C}_{27}\text{H}_{34}\text{N}_3\text{S}$   $[\text{M}+\text{H}]^+$  Calcd: 432.2473, Found: 432.2460

### 1-(4-Cyanophenyl)-3-[(1*R*,2*R*)-2-(pentan-3-ylamino)-1,2-diphenylethyl]thiourea (1f)

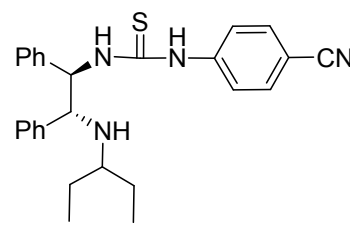

69% yield;  $[\alpha]_{\text{D}}^{20} = +55.5$  ( $c = 0.02$ ,  $\text{CH}_2\text{Cl}_2$ );  $^1\text{H NMR}$  (300 MHz,  $\text{DMSO-d}_6$ )  $\delta$  10.3 (br s, 1 H), 8.54 (br s, 1 H), 7.84~7.72 (m, 4 H), 7.35~7.17 (m, 10 H), 5.54 (br s, 1 H), 4.14 (d,  $J = 5.2$  Hz, 1 H), 2.07 (br s, 1 H), 1.56 (br s, 1 H), 1.21 (m, 4H), 0.74 (t,  $J = 7.4$  Hz, 3 H), 0.49 (t,  $J = 6.9$  Hz, 3H);  $^{13}\text{C NMR}$  (100 MHz,  $\text{DMSO-d}_6$ )  $\delta$  180.62, 144.83, 141.92, 141.05, 133.40, 128.67, 128.33, 127.68, 127.64, 127.51, 121.76, 119.76, 105.41, 64.41, 63.72, 60.43, 56.33, 26.74, 23.98, 21.42, 14.74, 11.02, 8.56; IR (KBr) 3317.0, 2960.2, 2360.4, 2225.5, 1949.7, 1739.5, 1508.1, 1315.2, 1176.4, 1072.2, 837.0, 700.0, 545.8  $\text{cm}^{-1}$ ; HRMS (FAB<sup>+</sup>) for  $\text{C}_{27}\text{H}_{31}\text{N}_4\text{S}$   $[\text{M}+\text{H}]^+$  Calcd: 443.2269, Found: 443.2279

### 1-[(1*R*,2*R*)-2-(Pentan-3-ylamino)-1,2-diphenylethyl]-3-[4-(trifluoromethyl) phenyl]thiourea (1g)

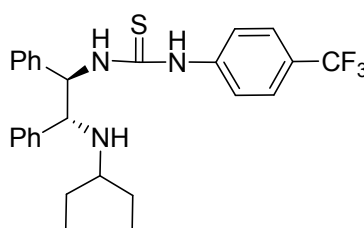

88% yield;  $[\alpha]_{\text{D}}^{20} = +45.5$  ( $c = 0.02$ ,  $\text{CH}_2\text{Cl}_2$ );  $^1\text{H NMR}$  (300 MHz,  $\text{DMSO-d}_6$ )  $\delta$  10.2 (br s, 1H), 8.41 (br s, 1H), 7.79 (d,  $J = 8.0$  Hz, 2H), 7.64 (d,  $J = 8.5$  Hz, 2H), 7.35~7.15 (m, 10H), 5.53 (br s, 1H), 4.13 (d,  $J = 5.5$  Hz, 1H), 2.07 (m, 1H), 1.30~1.15 (m, 4H), 0.73 (t,  $J = 7.1$  Hz, 3H), 0.49 (t,  $J = 6.9$  Hz, 3H);  $^{13}\text{C NMR}$  (100 MHz,  $\text{DMSO-d}_6$ )  $\delta$  180.91, 143.97, 141.18, 128.64, 128.52, 127.69, 127.48, 126.29, 122.41, 64.43, 63.71, 56.32, 26.68, 23.98, 10.98, 8.53; IR(KBr) 3205.3, 2962.3, 1945.9, 1741.5, 1517.8, 1324.9, 1245.9, 1066.5, 840.9, 700.1, 597.9  $\text{cm}^{-1}$ ; HRMS(FAB<sup>+</sup>) for  $\text{C}_{27}\text{H}_{31}\text{F}_3\text{N}_3\text{S}$   $[\text{M}+\text{H}]^+$  Calcd: 486.2191, Found: 486.2163.

### 1-[(1*R*,2*R*)-2-(Pentan-3-ylamino)-1,2-diphenylethyl]-3-(perfluorophenyl)thiourea (1h)

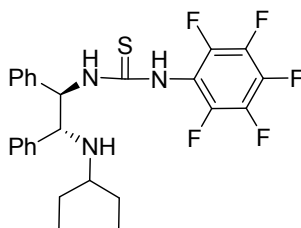

89% yield;  $[\alpha]_{\text{D}}^{20} = +80.4$  ( $c = 0.02$ ,  $\text{CH}_2\text{Cl}_2$ );  $^1\text{H NMR}$  (300 MHz,  $\text{DMSO-d}_6$ )  $\delta$  9.47 (s, 1 H), 8.61 (s, 1 H), 7.30~7.15 (m, 10 H), 5.48 (br s, 1 H), 4.13 (d,  $J = 6.1$  Hz, 1 H), 2.08 (m, 1 H), 1.54 (br, 1 H), 1.30~1.14 (m, 4 H), 0.74 (t,  $J = 7.4$  Hz, 3 H), 0.55 (t,  $J = 6.3$  Hz, 3 H);  $^{13}\text{C NMR}$  (100 MHz,  $\text{DMSO-d}_6$ )  $\delta$  183.63, 145.82, 143.43, 141.90, 140.77, 139.01, 138.84, 136.56, 129.39, 128.61, 128.43, 127.68, 127.60, 115.93, 64.77, 64.53, 56.37, 26.72, 24.16, 10.86, 8.58; IR (KBr) 3299.8, 2964.2, 1525.5, 1344.2, 1145.6, 991.3, 912.2, 700.1, 605.6  $\text{cm}^{-1}$ ; HRMS (FAB<sup>+</sup>) for  $\text{C}_{26}\text{H}_{27}\text{F}_5\text{N}_3\text{S}$   $[\text{M}+\text{H}]^+$  Calcd: 508.1846, Found: 508.1823.

### 1-(2,6-Difluorophenyl)-3-[(1*R*,2*R*)-2-(pentan-3-ylamino)-1,2-diphenylethyl]thiourea (1i)

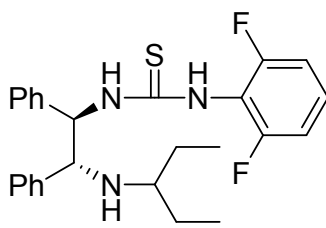

91% yield;  $[\alpha]_{\text{D}}^{20} = +391.0$  ( $c = 0.12$ ,  $\text{CH}_2\text{Cl}_2$ );  $^1\text{H NMR}$  (300 MHz,  $\text{DMSO-d}_6$ )  $\delta$  9.28 (s, 1 H), 8.21 (d,  $J = 3.57$  Hz, 1 H), 7.44~7.34 (m, 2 H), 7.27~7.14 (m, 10 H), 5.43 (br, 1 H), 4.10 (d,  $J = 5.77$  Hz, 1 H), 2.04 (br, 1H), 1.48 (br, 1H), 1.23~1.10 (m, 4H), 0.603 (t,  $J = 7.42$  3H), 0.492 (br, 3H); IR(KBr) 3155.0, 2960.2, 2360.4, 1951.6, 1735.6, 1469.5, 1294.0, 1241.9, 1006.7, 837.0, 700.0, 572.8  $\text{cm}^{-1}$ ; HRMS(FAB<sup>+</sup>) for  $\text{C}_{26}\text{H}_{30}\text{F}_2\text{N}_3\text{S}$   $[\text{M}+\text{H}]^+$  Calcd: 454.2129, Found: 454.2133

### (*R*)-Dimethyl 2-(2-nitro-1-phenylethyl)malonate (5a)

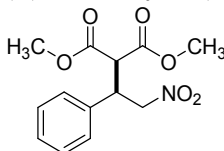

$[\alpha]_{\text{D}}^{20} = -1.98$  ( $c = 1.33$ ,  $\text{CH}_2\text{Cl}_2$ );  $^1\text{H NMR}$  (300 MHz,  $\text{CDCl}_3$ )  $\delta$  7.40~7.15 (m, 5H), 5.15~5.03 (m, 1H), 4.93 (dd,  $J = 4.5, 12.8$  Hz, 1H), 4.88~4.76 (m, 2H), 4.20 (td,  $J = 4.5, 9.5$  Hz, 1H), 3.76 (d,  $J = 9.5$  Hz, 1H), 1.24 (d,  $J = 6.1$  Hz, 3H), 1.07 (d,  $J = 6.4$  Hz, 3H), 1.01 (d,  $J = 6.4$  Hz, 3H) ppm;  $^{13}\text{C NMR}$  (100 MHz,  $\text{CDCl}_3$ )  $\delta$  167.1, 166.4, 136.3, 128.9, 128.3, 128.2, 77.9, 69.9, 69.5, 55.1, 42.9, 21.5, 21.4, 21.19, 21.17 ppm; IR(KBr) 3030, 2985, 1727, 1557  $\text{cm}^{-1}$ ; HRMS(ESI) for  $\text{C}_{13}\text{H}_{16}\text{N}_1\text{O}_6$   $[\text{M}+\text{H}]^+$  Calcd: 282.09726, Found: 282.09728; HPLC [Chiralcel AD-H, hexane/2-propanol = 95/5, 1.0 mL/min,  $\lambda = 254$  nm, retention times: (major) 23.3 min, (minor) 38.0 min].

### (*R*)-Diethyl 2-(2-nitro-1-phenylethyl)malonate (5b)

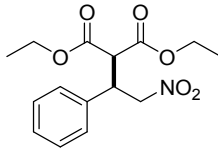

$[\alpha]_{\text{D}}^{20} = -4.61$  ( $c = 0.23$ ,  $\text{CH}_2\text{Cl}_2$ );  $^1\text{H NMR}$  (300 MHz,  $\text{CDCl}_3$ )  $\delta$  7.30~7.20 (m, 5H), 4.93 (dd,  $J = 4.6, 13.1$  Hz, 1H), 4.86 (dd,  $J = 9.2, 13.1$  Hz, 1H), 4.24~4.17 (m, 3H), 3.98~3.97 (q,  $J = 7.2$  Hz, 2H), 3.81~3.79 (d,  $J = 9.5$  Hz, 1H), 1.25 (t,  $J = 7.2$  Hz, 3H), 1.03 (t,  $J = 7.2$  Hz, 3H) ppm;  $^{13}\text{C NMR}$  (100 MHz,  $\text{CDCl}_3$ )  $\delta$  167.4, 166.7, 136.2, 128.8, 128.2, 127.9, 77.6, 62.0, 61.8, 54.9, 42.9, 13.9, 13.6 ppm; IR(KBr) 2989, 2938, 1731, 1557  $\text{cm}^{-1}$ ; HRMS(ESI) for  $\text{C}_{15}\text{H}_{20}\text{N}_1\text{O}_6$   $[\text{M}+\text{H}]^+$  Calcd: 310.12906, Found: 310.12936; HPLC [Chiralcel AD-H, hexane/ethanol = 90/10, 1.0 mL/min,  $\lambda = 254$  nm, retention times: (major) 11.5 min, (minor) 15.3 min].

### (*R*)-Diisopropyl 2-(2-nitro-1-phenylethyl)malonate (5c)

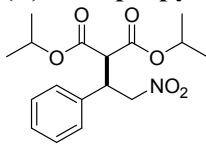

$[\alpha]_{\text{D}}^{20} = -1.24$  ( $c = 1.00$ ,  $\text{CH}_2\text{Cl}_2$ );  $^1\text{H NMR}$  (300 MHz,  $\text{CDCl}_3$ )  $\delta$  7.32~7.22 (m, 5H), 5.10 (dd,  $J = 5.0, 13.1$  Hz, 1H), 4.91~4.979 (m, 3H), 4.21~4.19 (m, 1H), 1.25 (d,  $J = 2.0$  Hz, 6H), 1.07 (dd,  $J = 2.0, 2.0$  Hz, 6H) ppm;  $^{13}\text{C NMR}$  (100 MHz,  $\text{CDCl}_3$ )  $\delta$  167.27, 166.54, 136.47, 129.07, 128.34, 127.9, 78.15, 70.15, 69.75, 55.35, 43.14, 21.80, 21.67, 21.48 ppm; IR(KBr) 3029, 2956, 1737, 1558  $\text{cm}^{-1}$ ; HRMS(ESI) for  $\text{C}_{17}\text{H}_{24}\text{N}_1\text{O}_6$   $[\text{M}+\text{H}]^+$  Calcd: 338.16036 Found: 338.10532; HPLC [Chiralcel AD-H, hexane/2-propanol = 95/5, 1.0 mL/min,  $\lambda = 254$  nm, retention times: (major) 14.8 min, (minor) 34.4 min].

**(R)-Dipropyl 2-(2-nitro-1-phenylethyl)malonate (5d)**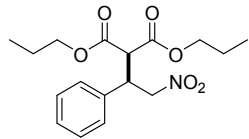

$[\alpha]_D^{20} = -1.73$  (*c* 0.10, CH<sub>2</sub>Cl<sub>2</sub>); <sup>1</sup>H NMR (300 MHz, CDCl<sub>3</sub>) δ 7.31~7.22 (m, 5H), 4.92~4.87 (t, *J* = 5.0, 9.5 Hz, 2H), 4.24 (m, 1H), 4.15~4.09 (m, 2H), 3.92~3.83 (dd, *s*, *J* = 6.6, 9.7 Hz, 3H), 1.68~1.61 (m, 2H), 1.49~1.42 (m, 2H), 0.93~0.88 (t, *J* = 7.4, 7.4 Hz, 3H), 0.82~0.77 (t, *J* = 7.4, 7.4 Hz, 3H) ppm; <sup>13</sup>C NMR (100 MHz, CDCl<sub>3</sub>) δ 167.79, 167.17, 136.46, 129.14, 128.52, 128.17, 77.85, 67.86, 67.65, 55.17, 43.16, 21.97, 21.81, 10.48 ppm; IR(KBr) 3029, 2956, 1737, 1558 cm<sup>-1</sup>; HRMS(ESI) for C<sub>17</sub>H<sub>24</sub>N<sub>1</sub>O<sub>6</sub>[M+H]<sup>+</sup> Calcd: 338.16036 Found: 338.16336; HPLC [Chiralcel AD-H, hexane/2-propanol = 95/5, 1.0 mL/min, λ = 254 nm, retention times: (major) 18.4 min, (minor) 38.9 min].

**(R)-dibutyl 2-(2-nitro-1-phenylethyl)malonate (5e)**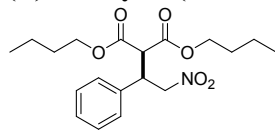

$[\alpha]_D^{20} = -2.55$  (*c* 0.10, CH<sub>2</sub>Cl<sub>2</sub>); <sup>1</sup>H NMR (400 MHz, CDCl<sub>3</sub>) δ 7.31~7.22 (m, 5H), 4.92~4.87 (t, *J* = 5.0, 9.5 Hz, 2H), 4.24 (m, 1H), 4.15~4.09 (m, 2H), 3.92~3.83 (dd, *s*, *J* = 6.6, 9.7 Hz, 3H), 1.68~1.61 (m, 2H), 1.49~1.42 (m, 2H), 0.93~0.88 (t, *J* = 7.4, 7.4 Hz, 3H), 0.82~0.77 (t, *J* = 7.4, 7.4 Hz, 3H) ppm; <sup>13</sup>C NMR (100 MHz, CDCl<sub>3</sub>) δ 167.79, 167.17, 136.46, 129.14, 128.52, 128.17, 77.85, 67.86, 67.65, 55.17, 43.16, 21.97, 21.81, 10.48 ppm; HRMS(EI) for C<sub>19</sub>H<sub>27</sub>NO<sub>6</sub>[M]<sup>+</sup> Calcd: 365.1838 Found: 365.1830; HPLC [Chiralcel AD-H, hexane/2-propanol = 95/5, 1.0 mL/min, λ = 254 nm, retention times: (major) 18.4 min, (minor) 38.9 min].

**(R)-Diethyl 2-[1-(4-bromophenyl)-2-nitroethyl]malonate (5f)**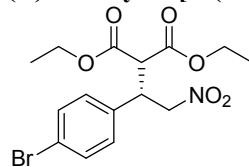

77 % yield;  $[\alpha]_D^{20} = -3.56$  (*c* 2.33, CH<sub>2</sub>Cl<sub>2</sub>); <sup>1</sup>H NMR (300 MHz, CDCl<sub>3</sub>) δ 7.44~7.42 (d, *J* = 8.5 Hz, 2H), 7.13~7.11 (d, *J* = 8.2 Hz, 2H), 4.88~4.81 (m, 2H), 4.22~4.16 (m, 3H), 4.04~3.97 (q, *J* = 7.1, 6.9 Hz, 2H), 3.78~3.75 (d, *J* = 9.4 Hz, 1H), 1.26~1.21 (t, *J* = 7.2, 7.1 Hz, 3H), 1.08~1.03 (t, *J* = 7.1, 7.1 Hz, 3H) ppm; <sup>13</sup>C NMR (100 MHz, CDCl<sub>3</sub>) δ 167.42, 166.83, 135.52, 132.29, 130.00, 122.62, 77.55, 62.50, 62.26, 54.86, 42.60, 14.17, 13.99 ppm; IR (KBr) 2983, 2950, 1732, 1556, 1490, 1445 cm<sup>-1</sup>; HRMS(ESI) for C<sub>15</sub>H<sub>19</sub>N<sub>1</sub>O<sub>6</sub>Br[M+H]<sup>+</sup> Calcd: 388.03957 Found: 388.04495; HPLC [Chiralcel AD-H, hexane/ethanol = 95/5, 1.0 mL/min, λ = 254 nm, retention times: (major) 35.9 min, (minor) 44.4 min].

**(R)-diethyl 2-(1-(4-chlorophenyl)-2-nitroethyl)malonate (5g)**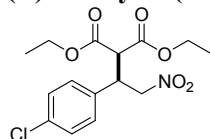

$[\alpha]_D^{20} = -0.24$  (*c* 0.43, CH<sub>2</sub>Cl<sub>2</sub>); <sup>1</sup>H NMR (300 MHz, CDCl<sub>3</sub>) δ 7.29~7.17 (dd, *J* = 20.6, 8.2 Hz, 4H), 4.88~4.81 (m, 2H), 4.23~4.16 (m, 3H), 4.04~3.97 (q, *J* = 7.1, 7.1 Hz, 2H), 3.78~3.75 (d, *J* = 9.3 Hz, 1H), 1.26~1.21 (t, *J* = 7.1, 7.2 Hz, 3H), 1.08~1.03 (t, *J* = 7.2, 6.8 Hz, 3H) ppm; <sup>13</sup>C NMR (100 MHz, CDCl<sub>3</sub>) δ 167.44, 166.83, 134.98, 134.46, 129.69, 129.32, 77.63, 62.49, 62.23, 54.92, 42.55, 14.15, 13.97 ppm; IR (KBr) 2984, 1733, 1557, 1478, 1445, 1371 cm<sup>-1</sup>; HRMS(ESI) for C<sub>15</sub>H<sub>19</sub>N<sub>1</sub>O<sub>6</sub>Cl[M+H]<sup>+</sup> Calcd: 344.08954 Found: 344.09119; HPLC [Chiralcel AD-H, hexane/ethanol = 90/10, 1.0 mL/min, λ = 254 nm, retention times: (major) 17.9 min, (minor) 24.1 min].

**(R)-Diethyl 2-[2-nitro-1-(*p*-tolyl)ethyl]malonate (5h)**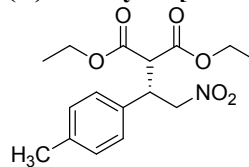

60 % yield;  $[\alpha]_D^{20} = -1.56$  (*c* 1.33, CH<sub>2</sub>Cl<sub>2</sub>); <sup>1</sup>H NMR (300 MHz, CDCl<sub>3</sub>) δ 7.09 (d, *J* = 15.2 Hz, 4H), 4.89~4.78 (m, 2H), 4.22~4.14 (m, 3H), 4.01~3.96 (q, *J* = 7.0, 7.1 Hz, 2H), 3.79 (d, *J* = 9.3 Hz, 1H), 2.27 (s, 3H), 1.25~1.22 (t, *J* = 7.1, 7.0 Hz, 3H), 1.06~1.02 (t, *J* = 7.1, 8.6 Hz, 3H) ppm; <sup>13</sup>C NMR (100 MHz, CDCl<sub>3</sub>) δ 167.74, 167.08, 138.27, 138.23, 133.30, 129.80, 128.05, 78.00, 62.32, 62.06, 55.24, 42.84, 21.28, 14.18, 13.97 ppm; IR(KBr) 3030, 2987, 1732, 1612, 1557 cm<sup>-1</sup>; HRMS(ESI) for C<sub>16</sub>H<sub>22</sub>N<sub>1</sub>O<sub>6</sub>[M+H]<sup>+</sup> Calcd: 324.14416 Found: 324.14648; HPLC [Chiralcel AD-H, hexane/ethanol = 98/2, 1.0 mL/min, λ = 254 nm, retention times: (major) 36.0 min, (minor) 42.8 min].

**(R)-Diethyl 2-[1-(4-methoxyphenyl)-2-nitroethyl]malonate (5i)**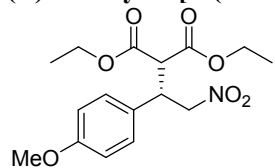

47 % yield;  $[\alpha]_D^{20} = -1.37$  (*c* 0.80, CH<sub>2</sub>Cl<sub>2</sub>); <sup>1</sup>H NMR (300 MHz, CDCl<sub>3</sub>) δ 7.16~7.13 (d, *J* = 8.5 Hz, 2H), 6.84~6.81 (d, *J* = 8.8 Hz, 2H), 4.87~4.80 (m, 2H), 4.24~4.16 (m, 3H), 4.04~3.97 (q, *J* = 7.1, 7.1 Hz, 2H), 3.79~3.78 (d, *J* = 2.7 Hz, 1H), 3.76 (s, 3H), 1.28~1.23 (t, *J* = 7.1, 7.2 Hz, 3H), 1.08~1.03 (t, *J* = 7.1, 7.1 Hz, 3H) ppm; <sup>13</sup>C NMR (100 MHz, CDCl<sub>3</sub>) δ 167.73, 167.08, 159.61, 129.36, 128.17, 114.48, 78.12, 62.34, 62.06, 55.42, 55.30, 42.53, 14.19, 14.01 ppm; IR(KBr) 2988, 2936, 2904, 1730, 1612, 1552 cm<sup>-1</sup>; HRMS(ESI) for C<sub>16</sub>H<sub>22</sub>N<sub>1</sub>O<sub>7</sub>[M+H]<sup>+</sup> Calcd: 340.13908 Found: 340.13901; HPLC [Chiralcel AD-H, hexane/ethanol = 90/10, 1.0 mL/min, λ = 254 nm, retention times: (major) 23.8 min, (minor) 39.5 min].

**(R)-Diethyl 2-[1-(2-methoxyphenyl)-2-nitroethyl]malonate (5j)**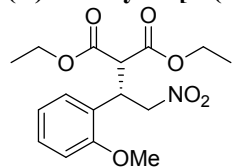

51 % yield;  $[\alpha]_D^{20} = -7.08$  (*c* 1.30, CH<sub>2</sub>Cl<sub>2</sub>); <sup>1</sup>H NMR (300 MHz, CDCl<sub>3</sub>) δ 7.26~7.21 (m, 1H), 7.15~7.12 (m, 1H), 6.87~6.83 (m, 2H), 5.06~4.98 (dd, *J* = 3.6, 1.1 Hz, 1H), 4.89~4.83 (dd, *J* = 3.6, 1.1 Hz, 1H), 4.37~4.34 (m, 1H), 4.24~4.12 (m, 3H), 3.97~3.90 (q, *J* = 7.2, 7.2 Hz, 2H), 3.85 (s, 3H), 1.28~1.23 (t, *J* = 7.1, 6.9 Hz, 3H), 1.01~0.96 (t, *J* = 7.2, 7.1 Hz, 3H) ppm; <sup>13</sup>C NMR (100 MHz, CDCl<sub>3</sub>) δ 168.14, 167.41, 157.62, 131.09, 129.83, 123.87, 120.96, 111.27, 76.40, 62.18, 61.77, 55.62, 52.89, 40.74, 14.20,

13.94 ppm; IR (KBr) 2984, 2939, 2908, 1732, 1613, 1556  $\text{cm}^{-1}$  HRMS(ESI) for  $\text{C}_{16}\text{H}_{22}\text{N}_1\text{O}_6[\text{M}]$  Calcd: 339.13125 Found: 339.12933; HPLC [Chiralcel AD-H, hexane/2-propanol = 95/5, 1.0 mL/min,  $\lambda = 254$  nm, retention times: (major) 14.9 min, (minor) 20.6 min].

**(R)-Diethyl 2-[1-(4-hydroxyphenyl)-2-nitroethyl]malonate (5k)**

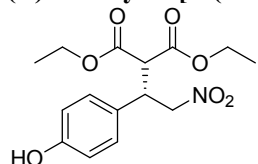

40 % yield;  $[\alpha]_{\text{D}}^{20} = -1.56$  ( $c = 0.50$ ,  $\text{CH}_2\text{Cl}_2$ );  $^1\text{H NMR}$  (300 MHz,  $\text{CDCl}_3$ )  $\delta$  7.09~7.06 (d,  $J = 8.3$  Hz, 2H), 6.72~6.70 (d,  $J = 8.2$  Hz, 2H), 5.63 (br, 1H), 4.91~4.74 (m, 2H), 4.25~4.12 (m, 3H), 4.05~3.98 (q,  $J = 7.1, 6.8$  Hz, 2H), 3.79 (d,  $J = 9.7$  Hz, 1H), 1.29~1.24 (t,  $J = 7.1, 6.6$  Hz, 3H), 1.09~1.05 (t,  $J = 7.1, 7.2$  Hz, 3H) ppm;  $^{13}\text{C NMR}$  (100 MHz,  $\text{CDCl}_3$ )  $\delta$  167.74, 167.28, 155.88, 129.54, 128.06, 78.17, 62.44, 62.23, 55.29, 42.53, 29.92, 14.20, 14.00 ppm; HRMS(ESI) for  $\text{C}_{15}\text{H}_{20}\text{N}_1\text{O}_7[\text{M}+\text{H}]^+$  Calcd: 326.12343 Found: 326.12903; HPLC [Chiralcel AD-H, hexane/ethanol = 90/10, 1.0 mL/min,  $\lambda = 254$  nm, retention times: (major) 20.4 min, (minor) 50.6 min].

**(R)-Diethyl 2-[1-(furan-2-yl)-2-nitroethyl]malonate (5l)**

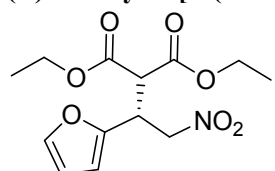

78 % yield;  $[\alpha]_{\text{D}}^{20} = +5.06$  ( $c 0.33$ ,  $\text{CH}_2\text{Cl}_2$ );  $^1\text{H NMR}$  (300 MHz,  $\text{CDCl}_3$ )  $\delta$  7.34~7.26 (d,  $J = 23.9$  Hz, 1H), 6.29~6.28 (t,  $J = 2.9, 1.6$  Hz, 1H), 6.22~6.21 (d,  $J = 3.0$  Hz, 1H), 4.91~4.88 (m, 2H), 4.39~4.37 (m, 1H), 4.25~4.11 (m, 4H), 3.91~3.88 (d,  $J = 7.9$  Hz, 1H), 1.28~1.23 (t,  $J = 7.1, 6.9$  Hz, 3H), 1.22~1.17 (t,  $J = 7.1, 6.9$  Hz, 3H) ppm;  $^{13}\text{C NMR}$  (100 MHz,  $\text{CDCl}_3$ )  $\delta$  167.35, 167.04, 149.74, 142.95, 110.74, 108.67, 75.64, 62.38, 53.20, 37.03, 29.92, 14.17, 14.11 ppm; IR (KBr) 2985, 2940, 1734, 1559, 1506, 1466, 1448; HRMS(ESI) for  $\text{C}_{13}\text{H}_{18}\text{N}_1\text{O}_7[\text{M}+\text{H}]^+$  Calcd: 300.10778 Found: 300.10742; HPLC [Chiralcel AD-H, hexane/2-propanol = 95/5, 0.6 mL/min,  $\lambda = 254$  nm, retention times: (major) 22.7 min, (minor) 29.2 min].

**(R)-4-amino-3-phenylbutanoic acid (6a)**

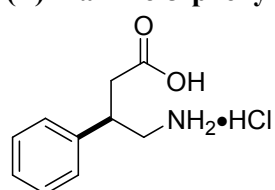

$[\alpha]_{\text{D}}^{20} = +3.12$  ( $c 2.33$ , MeOH);  $^1\text{H NMR}$  (400 MHz,  $\text{D}_2\text{O}$ )  $\delta$  7.27~7.19 (m, 5H), 3.21 (m, 2H), 3.11~3.08 (d, 1H), 2.69 (dd, 1H,  $J = 16.0, 6.0$  Hz), 2.59~2.55 (dd, 1H,  $J = 16.5, 8.5$  Hz) ppm;  $^{13}\text{C NMR}$  (100 MHz,  $\text{DMSO}-d_6$ )  $\delta$  175.29, 138.61, 129.57, 128.11, 44.10, 39.94, 38.35 ppm; HRMS(ESI $^+$ ) for  $\text{C}_9\text{H}_{12}\text{ClNO}_2[\text{M}-\text{HCl}]^+$  Calcd: 180.10, Found: 180.20.

# Copy of HPLC Chromatograms

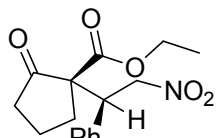

HPLC [Chiralpak OD-H column, hexanes/2-propanol = 93/7, flow rate = 1 mL/min, λ = 220 nm] retention times: (major enantiomer) = 19.4 min, (minor enantiomer) = 13.2 min, (minor diastereomers) 11.3, 15.7 min.  
 Racemic mixture

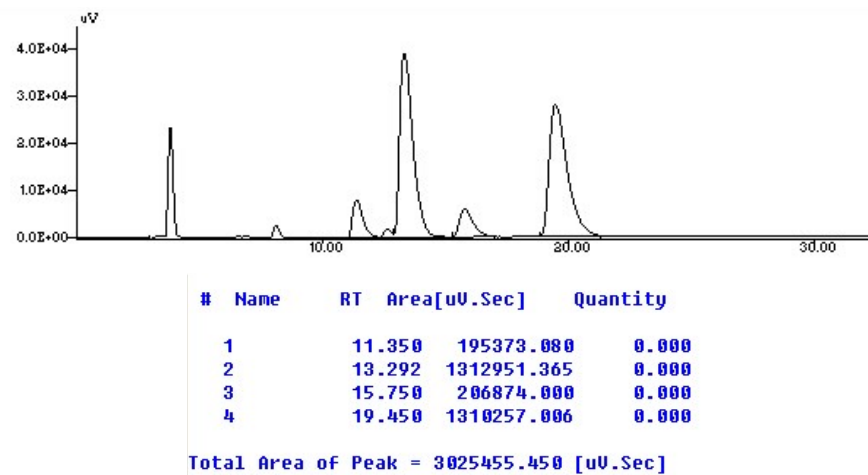

Table 1-1

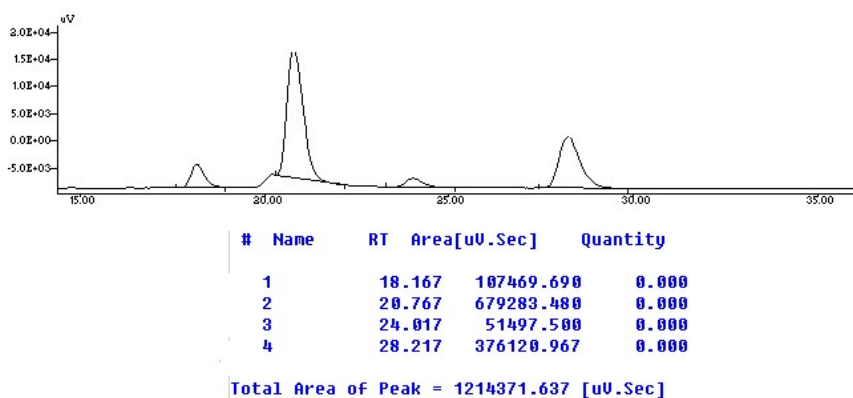

Table 1-2

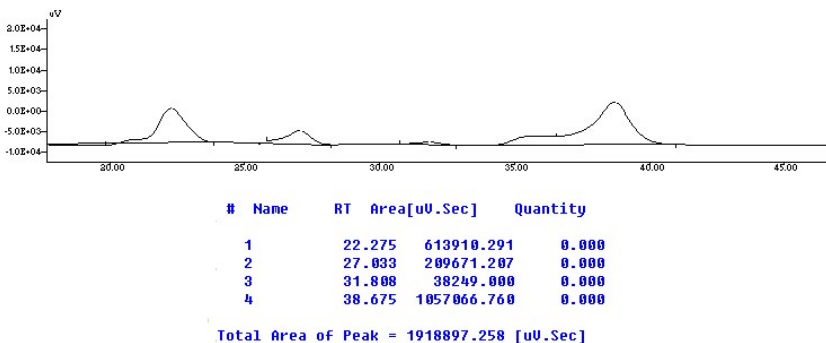

Table 1-3

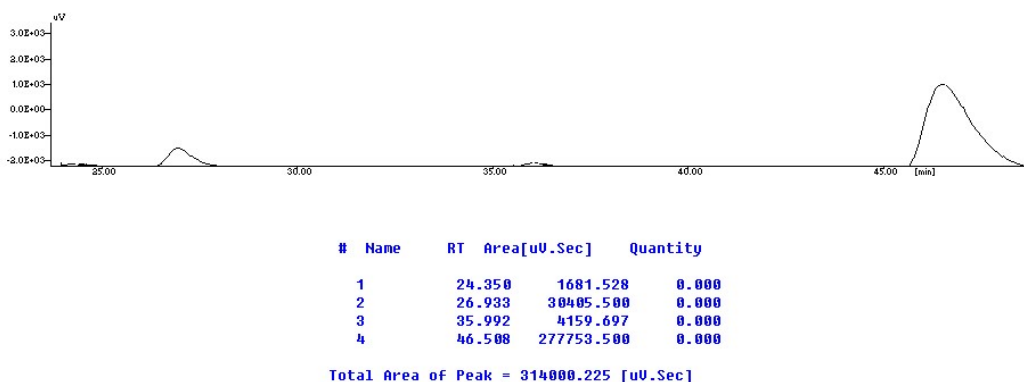

Table 1-4

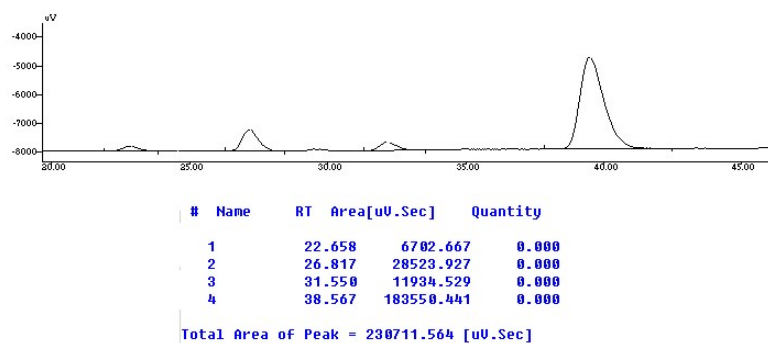

Table 1-5

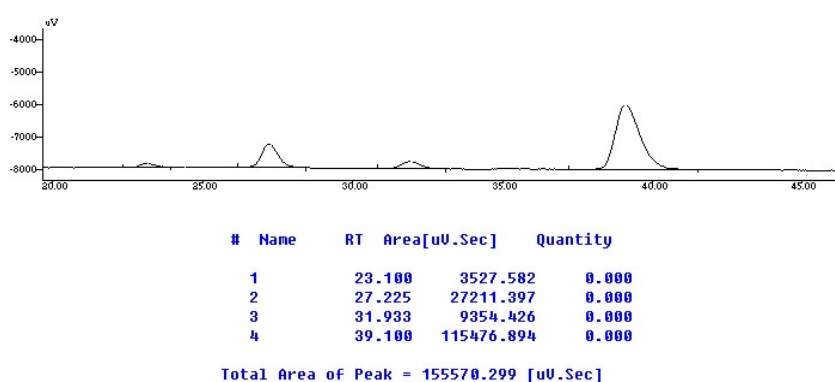

Table 1-6

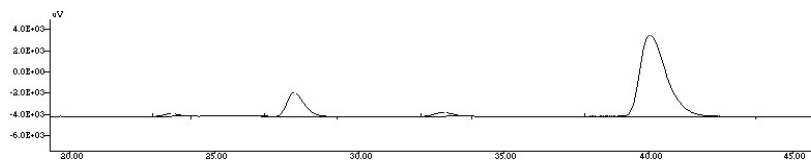

| # | Name | RT     | Area[uV.Sec] | Quantity |
|---|------|--------|--------------|----------|
| 1 |      | 23.492 | 9057.771     | 0.000    |
| 2 |      | 27.750 | 90877.987    | 0.000    |
| 3 |      | 32.917 | 16670.317    | 0.000    |
| 4 |      | 40.017 | 475406.545   | 0.000    |

Total Area of Peak = 592012.620 [uV.Sec]

Table 1-7

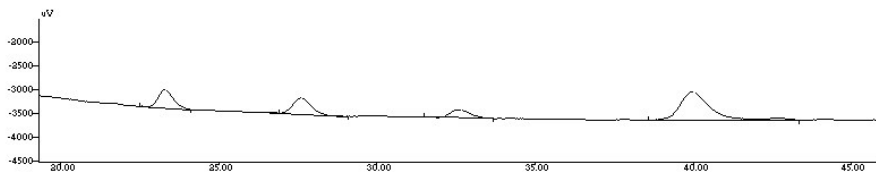

| # | Name | RT     | Area[uV.Sec] | Quantity |
|---|------|--------|--------------|----------|
| 1 |      | 23.300 | 12629.394    | 0.000    |
| 2 |      | 27.600 | 13772.279    | 0.000    |
| 3 |      | 32.592 | 6729.778     | 0.000    |
| 4 |      | 39.975 | 40892.005    | 0.000    |

Total Area of Peak = 74023.456 [uV.Sec]

Table 1-8

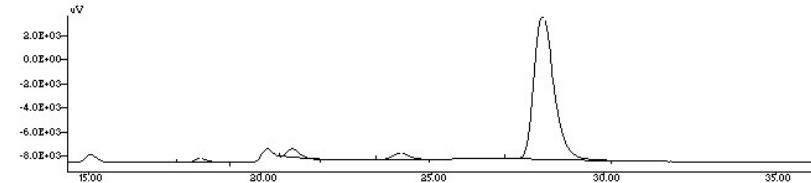

| # | Name | RT     | Area[uV.Sec] | Quantity |
|---|------|--------|--------------|----------|
| 1 |      | 18.225 | 8143.243     | 0.000    |
| 2 |      | 20.933 | 17234.385    | 0.000    |
| 3 |      | 24.058 | 17373.441    | 0.000    |
| 4 |      | 28.192 | 473902.584   | 0.000    |

Total Area of Peak = 516653.653 [uV.Sec]

Table 1-9

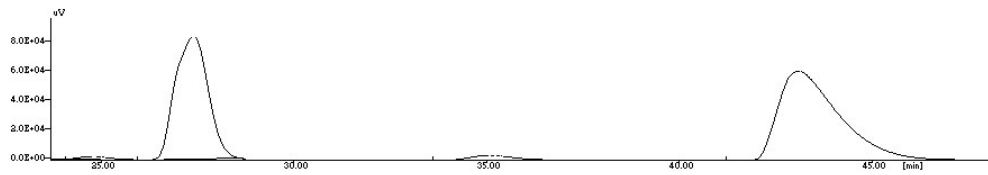

| # | Name | RT     | Area[uV.Sec] | Quantity |
|---|------|--------|--------------|----------|
| 1 |      | 24.767 | 113410.757   | 0.000    |
| 2 |      | 27.383 | 4790171.109  | 0.000    |
| 3 |      | 35.050 | 238650.438   | 0.000    |
| 4 |      | 43.058 | 6496952.627  | 0.000    |

Total Area of Peak = 11639184.931 [uV.Sec]

Table 1-10

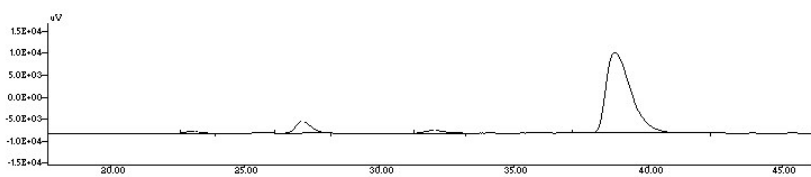

| # | Name | RT     | Area[uV.Sec] | Quantity |
|---|------|--------|--------------|----------|
| 1 |      | 23.033 | 15540.833    | 0.000    |
| 2 |      | 27.133 | 106738.827   | 0.000    |
| 3 |      | 32.008 | 30123.500    | 0.000    |
| 4 |      | 38.750 | 1146387.500  | 0.000    |

Total Area of Peak = 1298790.660 [uV.Sec]

Table 1-11

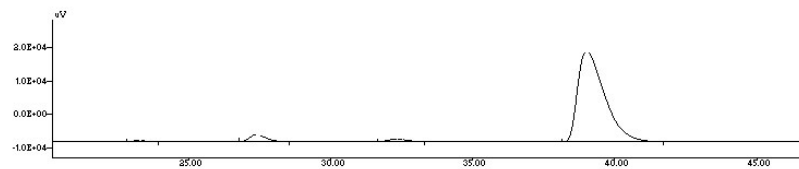

| # | Name | RT     | Area[uV.Sec] | Quantity |
|---|------|--------|--------------|----------|
| 1 |      | 23.258 | 11272.750    | 0.000    |
| 2 |      | 27.400 | 80813.000    | 0.000    |
| 3 |      | 32.325 | 34228.500    | 0.000    |
| 4 |      | 39.000 | 1715774.000  | 0.000    |

Total Area of Peak = 1842088.250 [uV.Sec]

Table 2-1

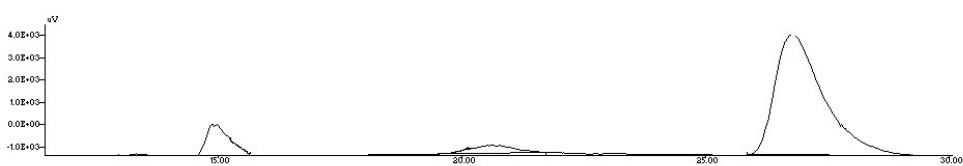

| # | Name | RT     | Area[uV.Sec] | Quantity |
|---|------|--------|--------------|----------|
| 1 |      | 12.875 | 3464.500     | 0.000    |
| 2 |      | 15.400 | 64993.571    | 0.000    |
| 3 |      | 18.558 | 14985.613    | 0.000    |
| 4 |      | 23.142 | 278168.000   | 0.000    |

Total Area of Peak = 361611.683 [uV.Sec]

Table 2-2



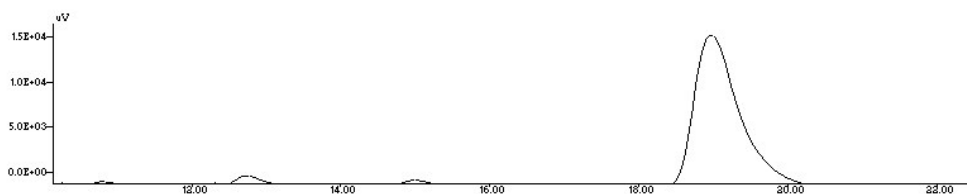

| # | Name | RT     | Area[uU.Sec] | Quantity |
|---|------|--------|--------------|----------|
| 1 |      | 18.800 | 10446.500    | 0.000    |
| 2 |      | 12.733 | 33284.986    | 0.000    |
| 3 |      | 14.958 | 20855.099    | 0.000    |
| 4 |      | 18.958 | 708711.500   | 0.000    |

Total Area of Peak = 773298.085 [uU.Sec]

Table 2-3

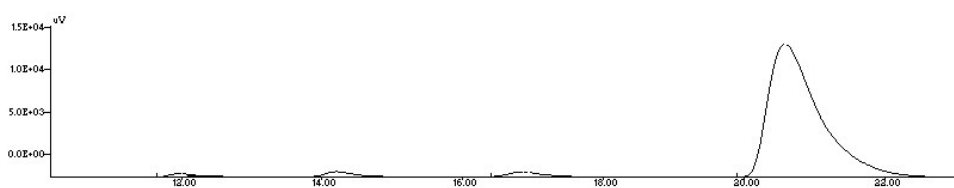

| # | Name | RT     | Area[uU.Sec] | Quantity |
|---|------|--------|--------------|----------|
| 1 |      | 11.967 | 9032.000     | 0.000    |
| 2 |      | 14.192 | 17037.750    | 0.000    |
| 3 |      | 16.833 | 18151.500    | 0.000    |
| 4 |      | 20.575 | 773422.000   | 0.000    |

Total Area of Peak = 817643.250 [uU.Sec]

Table 2-4

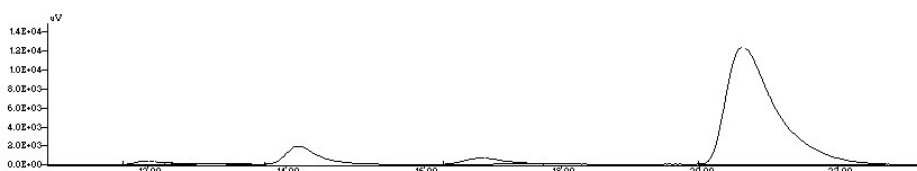

| # | Name | RT     | Area[uU.Sec] | Quantity |
|---|------|--------|--------------|----------|
| 1 |      | 11.983 | 7555.750     | 0.000    |
| 2 |      | 14.175 | 53969.500    | 0.000    |
| 3 |      | 16.850 | 23893.500    | 0.000    |
| 4 |      | 20.608 | 599360.750   | 0.000    |

Total Area of Peak = 684779.500 [uU.Sec]

Table 2-5

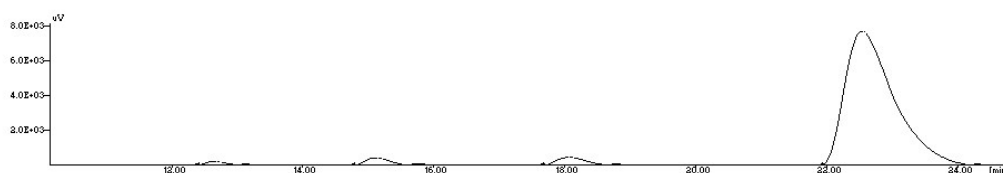

| # | Name | RT     | Area[uU.Sec] | Quantity |
|---|------|--------|--------------|----------|
| 1 |      | 12.658 | 5720.820     | 0.000    |
| 2 |      | 15.117 | 10307.920    | 0.000    |
| 3 |      | 18.042 | 13619.910    | 0.000    |
| 4 |      | 22.542 | 396788.250   | 0.000    |

Total Area of Peak = 426436.901 [uU.Sec]

Table 2-6

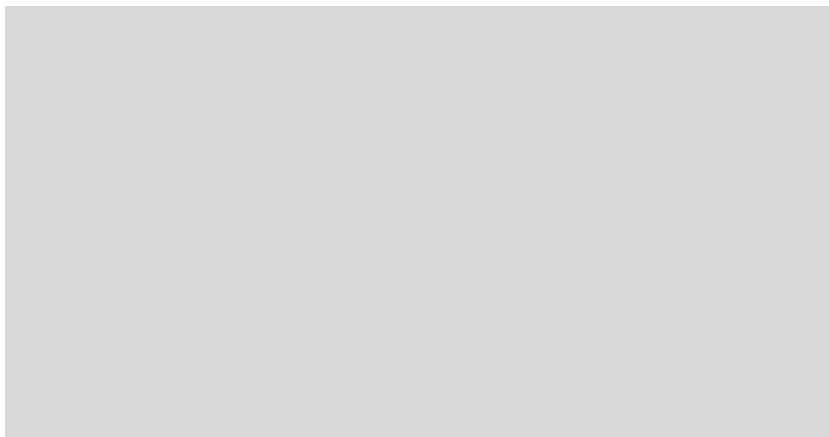

| # | Name | RT     | Area[uU.Sec] | Quantity |
|---|------|--------|--------------|----------|
| 1 |      | 8.075  | 999079.308   | 0.000    |
| 2 |      | 10.800 | 21685612.295 | 0.000    |
| 3 |      | 11.450 | 14579985.667 | 0.000    |
| 4 |      | 19.925 | 579822.500   | 0.000    |

Total Area of Peak = 37844499.769 [uU.Sec]

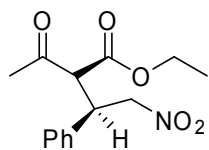

HPLC [Chiralcel AD-H, hexane/2-propanol = 80/20, 0.8 mL/min,  $\lambda$  = 210 nm, retention times: (major diastereomer) 10.0, 11.4 min, (minor diastereomer) 8.0, 19.9 min].

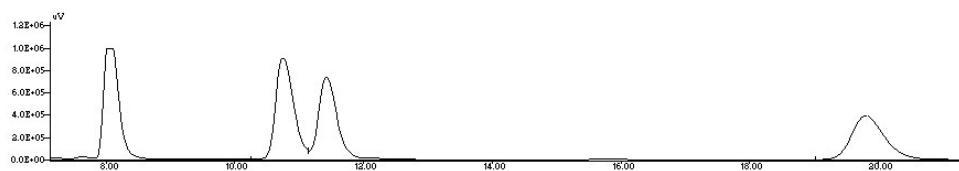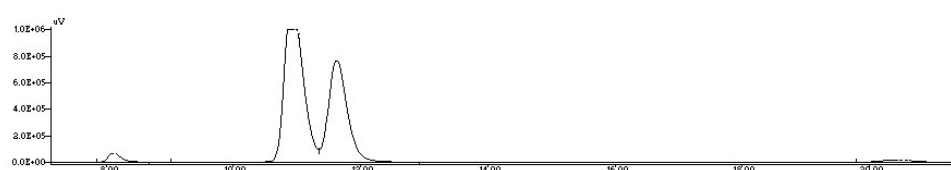

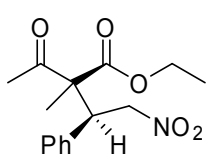

| # | Name | RT     | Area[uU.Sec] | Quantity |
|---|------|--------|--------------|----------|
| 1 |      | 25.775 | 21847099.500 | 0.000    |
| 2 |      | 33.400 | 4525516.000  | 0.000    |
| 3 |      | 41.133 | 21951201.500 | 0.000    |
| 4 |      | 52.708 | 4436148.000  | 0.000    |

Total Area of Peak = 52759965.000 [uU.Sec]

HPLC [Chiralcel OD-H, hexane/2-propanol = 90/10, 0.5 mL/min,  $\lambda = 210$  nm, retention times: (major diastereomer) 41.1, 52.7 min, (minor diastereomer) 25.7, 33.4 min].

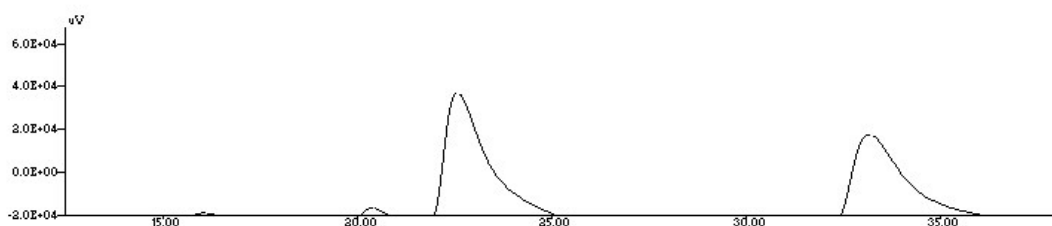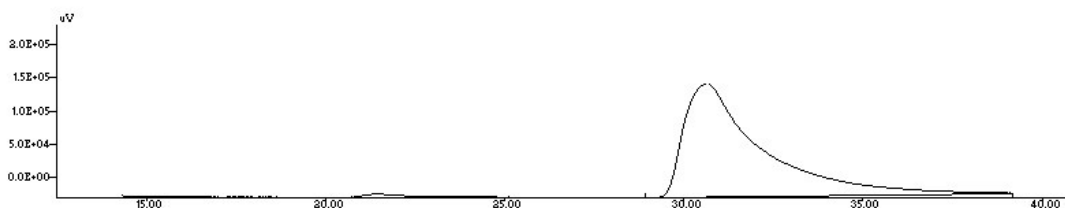

| # | Name | RT     | Area[uU.Sec] | Quantity |
|---|------|--------|--------------|----------|
| 1 |      | 15.742 | 306537.004   | 0.000    |
| 2 |      | 18.517 | 997411.375   | 0.000    |
| 3 |      | 23.392 | 216029.330   | 0.000    |
| 4 |      | 28.858 | 871957.569   | 0.000    |

Total Area of Peak = 2391935.278 [uU.Sec]

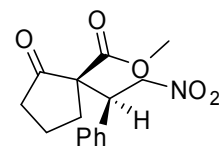

HPLC [Chiralcel OD-H, hexane/2-propanol = 93/7, 0.5 mL/min,  $\lambda = 210$  nm, retention times: (major enantiomer) 28.8 min, (minor enantiomer) 23.3 min, (minor diastereomers) 15.7, 18.5 min].

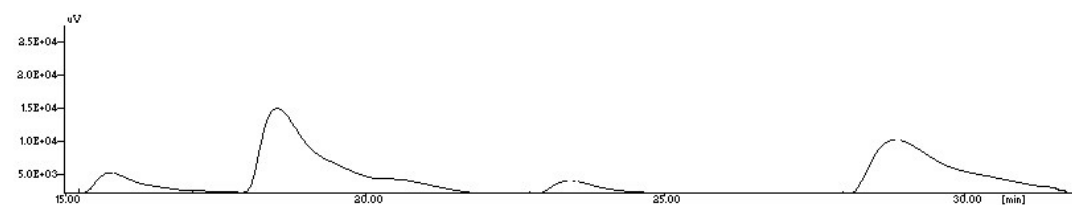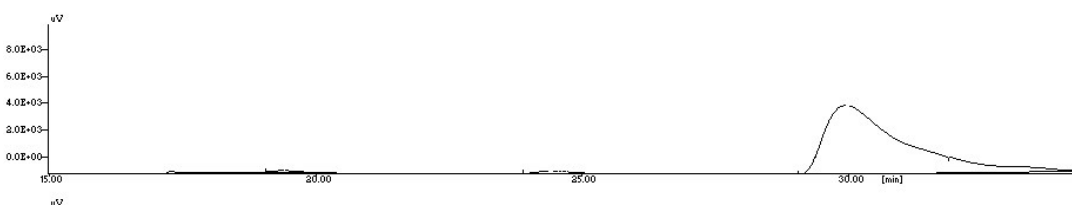

| # | Name | RT     | Area[uU.Sec] | Quantity |
|---|------|--------|--------------|----------|
| 1 |      | 45.617 | 26882150.251 | 0.000    |
| 2 |      | 50.875 | 23058528.250 | 0.000    |
| 3 |      | 71.742 | 4202070.500  | 0.000    |
| 4 |      | 94.417 | 3951120.871  | 0.000    |

Total Area of Peak = 58093869.871 [uU.Sec]

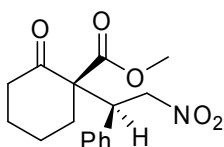

HPLC [Chiralcel OJ-H, hexane/2-propanol = 80/20, 0.5 mL/min,  $\lambda = 210$  nm, retention times: (major enantiomer) 50.8 min, (minor enantiomer) 45.6 min, (minor diastereomers) 71.7, 94.4 min].

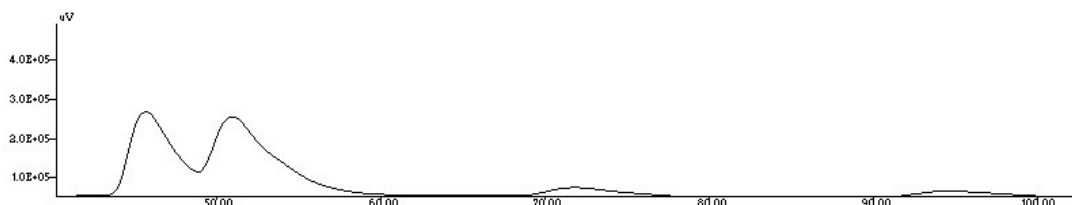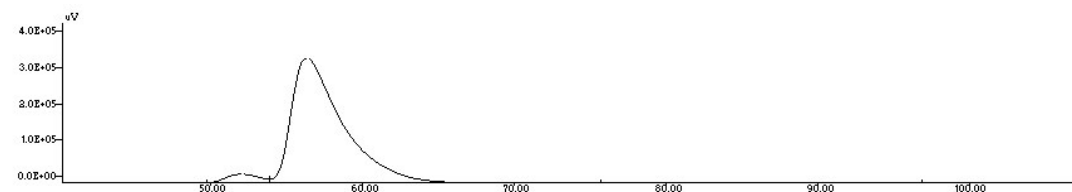

| # | Name | RT     | Area[uU.Sec] | Quantity |
|---|------|--------|--------------|----------|
| 1 |      | 17.375 | 1125496.998  | 0.000    |
| 2 |      | 18.717 | 32770035.805 | 0.000    |
| 3 |      | 20.400 | 755597.780   | 0.000    |
| 4 |      | 22.258 | 1629143.717  | 0.000    |

Total Area of Peak = 36280274.300 [uU.Sec]

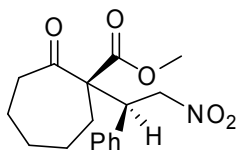

HPLC [Chiralcel AD-H, hexane/2-propanol = 90/10, 0.5 mL/min,  $\lambda = 210$  nm, retention times: (major enantiomer) 18.7 min, (minor enantiomer) 22.2 min, (minor diastereomers) 17.3, 20.4 min].

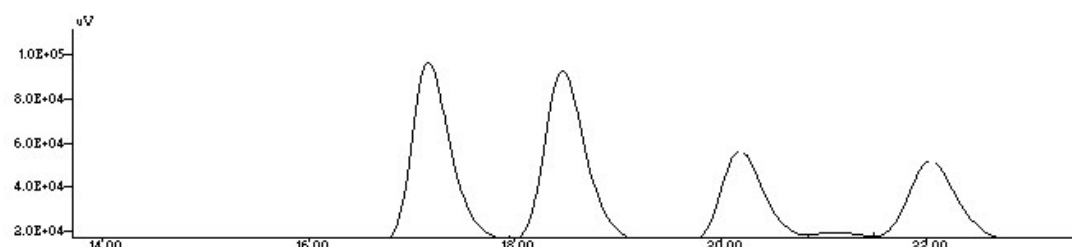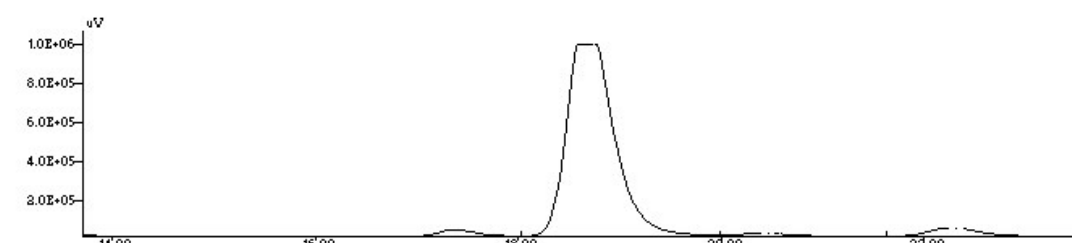

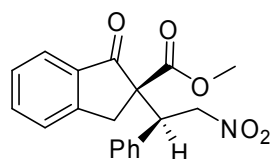

| # | Name | RT     | Area[uU.Sec]  | Quantity |
|---|------|--------|---------------|----------|
| 1 |      | 14.758 | 23687076.790  | 0.000    |
| 2 |      | 17.067 | 12451976.710  | 0.000    |
| 3 |      | 37.392 | 51315109.000  | 0.000    |
| 4 |      | 68.642 | 256725602.500 | 0.000    |

Total Area of Peak = 344179765.000 [uU.Sec]

HPLC [Chiralcel OD-H, hexane/2-propanol = 90/10, 1 mL/min,  $\lambda$  = 210 nm, retention times: (major enantiomer) 68.6 min, (minor enantiomer) 14.7 min, (minor diastereomers) 17.0, 37.4 min].

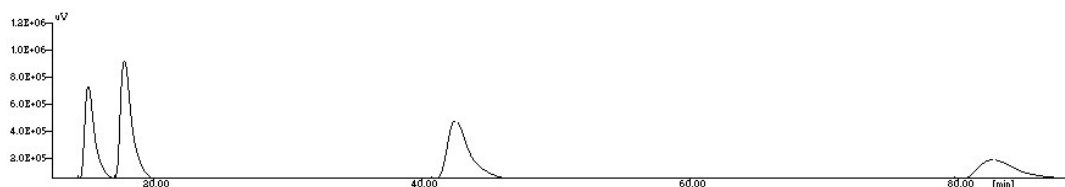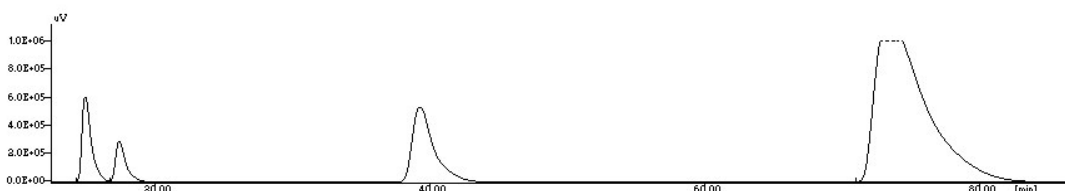

| # | Name | RT     | Area[uU.Sec] | Quantity |
|---|------|--------|--------------|----------|
| 1 |      | 26.600 | 2068457.000  | 0.000    |
| 2 |      | 34.483 | 2050302.290  | 0.000    |
| 3 |      | 42.175 | 69383439.750 | 0.000    |
| 4 |      | 54.225 | 5310285.500  | 0.000    |

Total Area of Peak = 78812484.541 [uU.Sec]

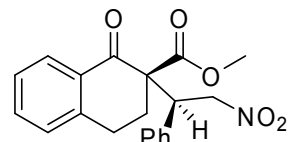

HPLC [Chiralcel OD-H, hexane/2-propanol = 90/10, 0.5 mL/min,  $\lambda$  = 254 nm, retention times: (major enantiomer) 42.1 min, (minor enantiomer) 26.6 min, (minor diastereomers) 34.4, 54.2 min].

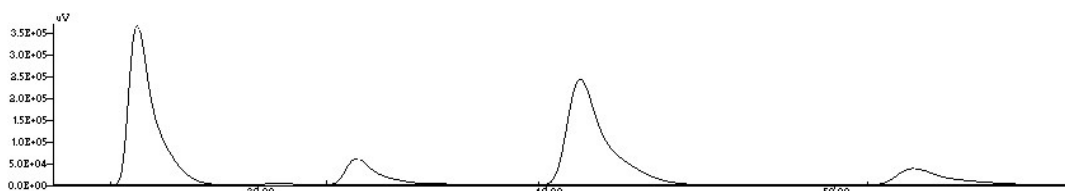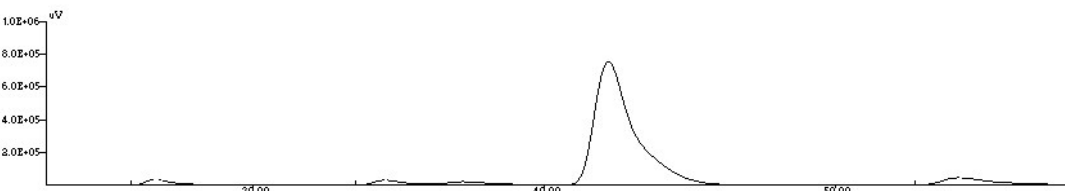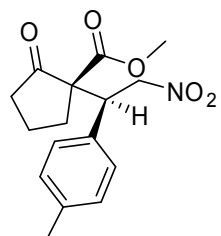

| # | Name | RT     | Area[uU.Sec] | Quantity |
|---|------|--------|--------------|----------|
| 1 |      | 13.725 | 3601024.709  | 0.000    |
| 2 |      | 16.492 | 3829099.026  | 0.000    |
| 3 |      | 18.042 | 2579399.430  | 0.000    |
| 4 |      | 25.117 | 20101765.874 | 0.000    |

Total Area of Peak = 30111289.838 [uU.Sec]

HPLC [Chiralcel OD-H, hexane/2-propanol = 97/3, flow rate = 1 mL/min,  $\lambda$  = 220 nm: retention times: (major enantiomer) 25.1 min, (minor enantiomer) 16.4 min, (minor diastereomers) 13.7, 18.0 min].

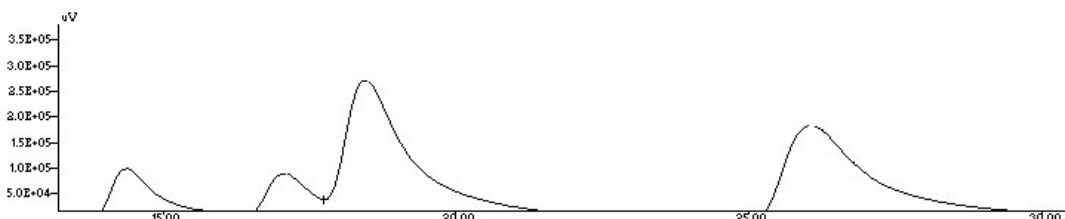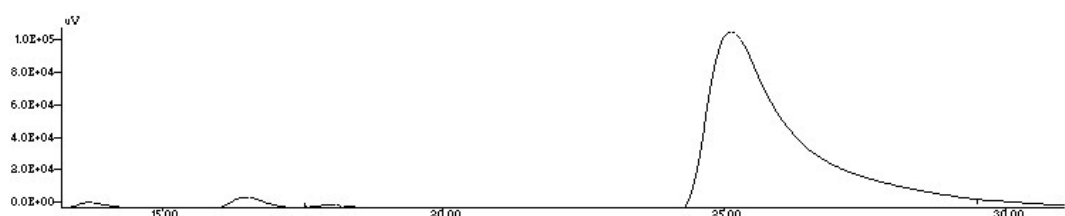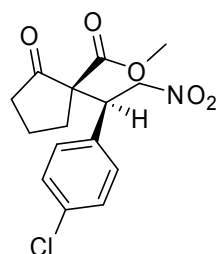

| # | Name | RT     | Area[uU.Sec] | Quantity |
|---|------|--------|--------------|----------|
| 1 |      | 19.758 | 63514.816    | 0.000    |
| 2 |      | 23.767 | 50440.492    | 0.000    |
| 3 |      | 28.342 | 132361.135   | 0.000    |
| 4 |      | 42.500 | 3650280.255  | 0.000    |

Total Area of Peak = 3896596.698 [uU.Sec]

HPLC [Chiralcel OD-H, hexane/2-propanol = 97/3, flow rate = 1 mL/min,  $\lambda$  = 220 nm: retention times: (major enantiomer) 42.5 min, (minor enantiomer) 28.3 min, (minor diastereomers) 19.7, 23.7 min].

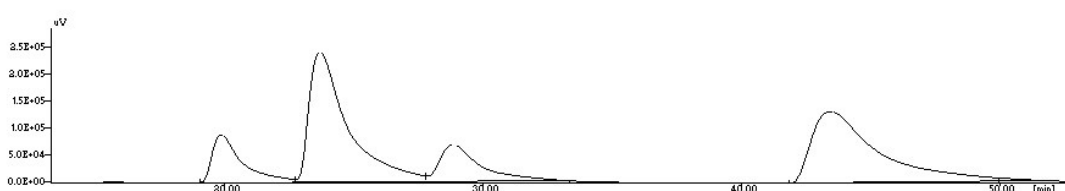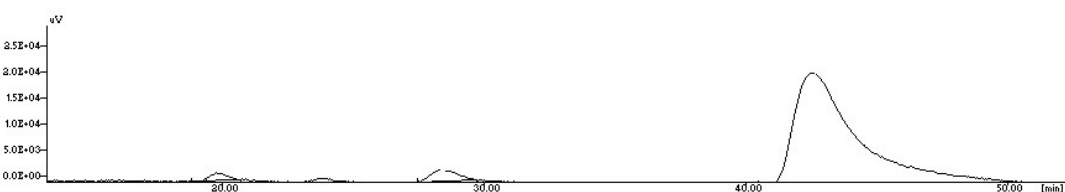

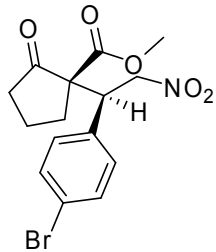

| # | Name | RT     | Area[uV.Sec] | Quantity |
|---|------|--------|--------------|----------|
| 1 |      | 21.558 | 102612.000   | 0.000    |
| 2 |      | 27.100 | 51384.339    | 0.000    |
| 3 |      | 28.067 | 232165.719   | 0.000    |
| 4 |      | 38.333 | 8224147.000  | 0.000    |

Total Area of Peak = 8610309.058 [uV.Sec]

HPLC [Chiralcel OD-H, hexane/2-propanol = 97/3, flow rate = 1 mL/min,  $\lambda$  = 220 nm: retention times: (major enantiomer) 38.3 min, (minor enantiomer) 28.0 min, (minor diastereomers) 21.5, 27.1 min].

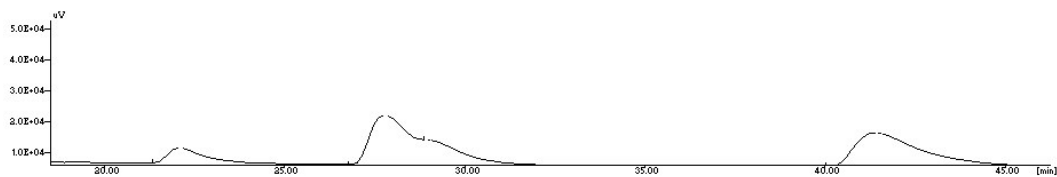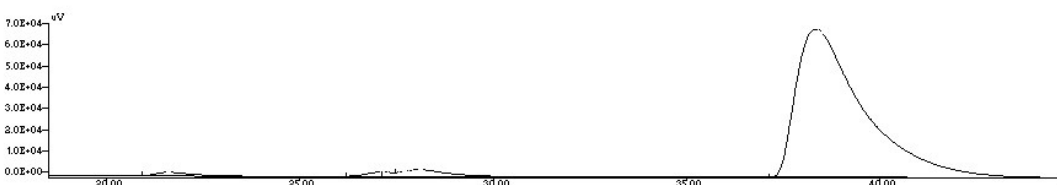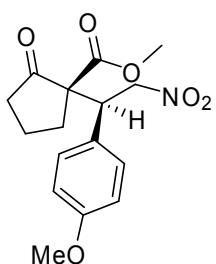

| # | Name | RT     | Area[uV.Sec] | Quantity |
|---|------|--------|--------------|----------|
| 1 |      | 29.558 | 2458846.250  | 0.000    |
| 2 |      | 35.608 | 5248699.500  | 0.000    |
| 3 |      | 41.392 | 2549363.000  | 0.000    |
| 4 |      | 47.833 | 99354544.500 | 0.000    |

Total Area of Peak = 109611453.250 [uV.Sec]

HPLC [Chiralcel OD-H, hexane/2-propanol = 97/3, flow rate = 1 mL/min,  $\lambda$  = 220 nm: retention times: (major enantiomer) 47.8 min, (minor enantiomer) 35.6 min, (minor diastereomers) 29.5, 41.3 min].

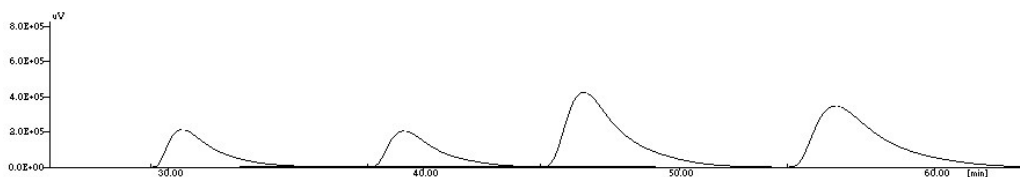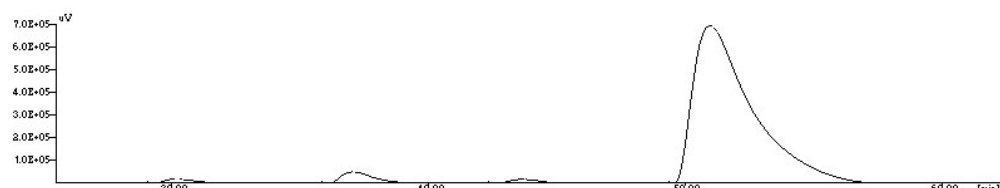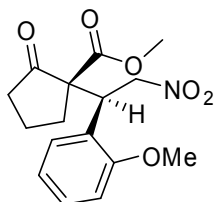

| # | Name | RT     | Area[uV.Sec] | Quantity |
|---|------|--------|--------------|----------|
| 1 |      | 45.842 | 23268493.702 | 0.000    |
| 2 |      | 51.633 | 8688388.588  | 0.000    |
| 3 |      | 54.383 | 13760978.045 | 0.000    |
| 4 |      | 61.158 | 24242080.942 | 0.000    |

Total Area of Peak = 69959941.278 [uV.Sec]

HPLC [Chiralcel OJ-H, hexane/2-propanol = 95/5, flow rate = 1 mL/min,  $\lambda$  = 220 nm: retention times: (major enantiomer) 45.8 min, (minor enantiomer) 51.6 min, (minor diastereomers) 54.3, 61.1 min].

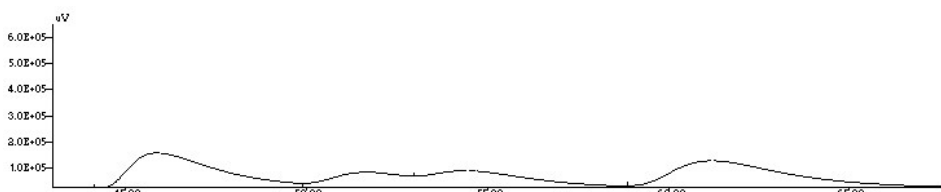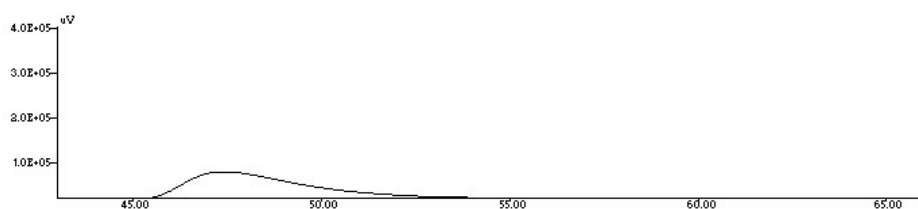

| # | Name | RT     | Area[uV.Sec] | Quantity |
|---|------|--------|--------------|----------|
| 1 |      | 17.125 | 138674.097   | 0.000    |
| 2 |      | 19.533 | 34286.500    | 0.000    |
| 3 |      | 20.550 | 25535.500    | 0.000    |
| 4 |      | 23.467 | 11243377.000 | 0.000    |

Total Area of Peak = 11441873.097 [uV.Sec]

HPLC [Chiralcel OD-H, hexane/2-propanol = 95/5, flow rate = 0.5 mL/min,  $\lambda$  = 215 nm: retention times: (major enantiomer) 23.4 min, (minor enantiomer) 17.1 min, (minor diastereomers) 19.5, 20.5 min].

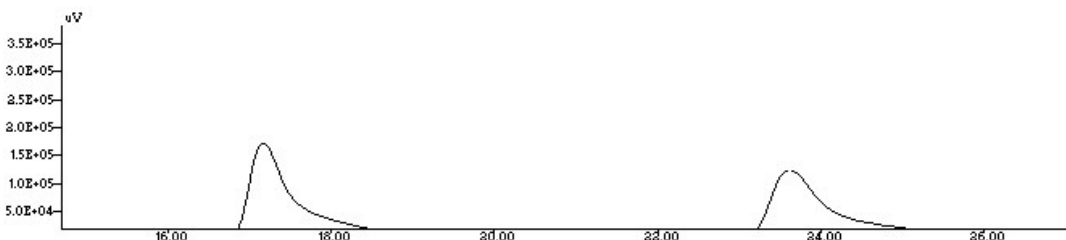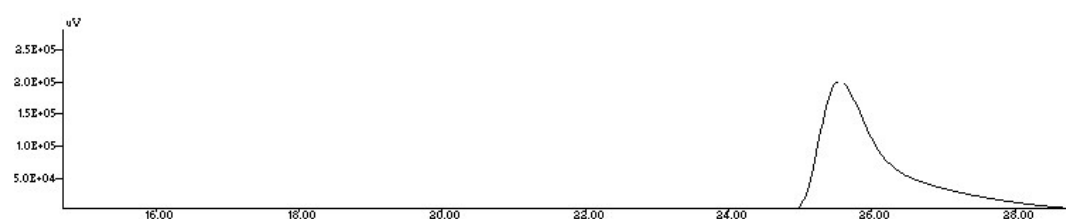



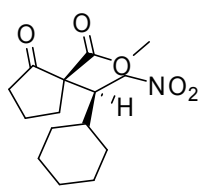

| # | Name | RT     | Area[uV.Sec] | Quantity |
|---|------|--------|--------------|----------|
| 1 |      | 12.258 | 234762.862   | 0.000    |
| 2 |      | 12.683 | 233306.982   | 0.000    |
| 3 |      | 17.300 | 15429728.384 | 0.000    |
| 4 |      | 19.192 | 19723716.998 | 0.000    |

Total Area of Peak = 35621515.226 [uV.Sec]

HPLC [Chiralcel OD-H, hexane/2-propanol = 95/5, flow rate = 0.5 mL/min,  $\lambda = 215$  nm: retention times: (major enantiomer) 19.1 min, (minor enantiomer) 17.3 min, (minor diastereomers) 12.2, 12.6 min].

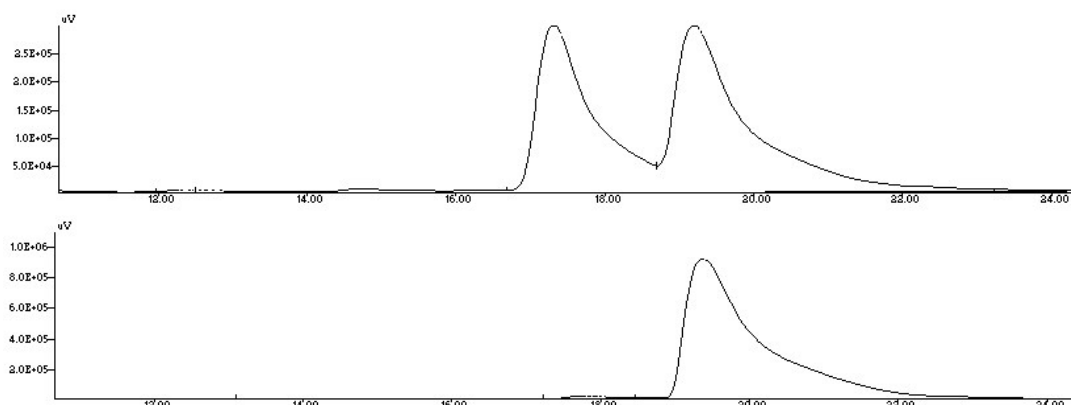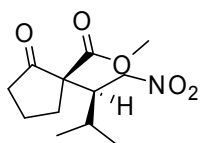

| # | Name | RT     | Area[uV.Sec] | Quantity |
|---|------|--------|--------------|----------|
| 1 |      | 10.283 | 181057.925   | 0.000    |
| 2 |      | 11.417 | 11934421.750 | 0.000    |

Total Area of Peak = 12115479.675 [uV.Sec]

HPLC [Chiralcel OD-H, hexane/2-propanol = 95/5, flow rate = 1 mL/min,  $\lambda = 215$  nm: retention times: (major enantiomer) 11.4 min, (minor enantiomer) 10.2 min, (minor diastereomers) 19.3, 36.1 min].

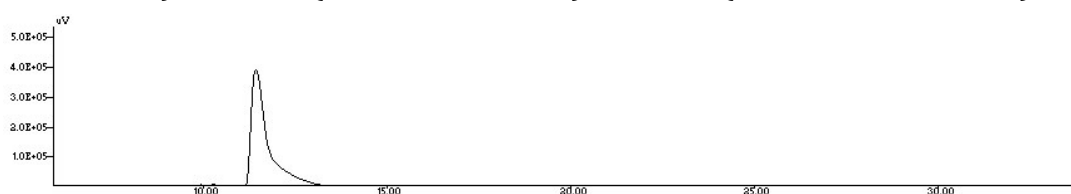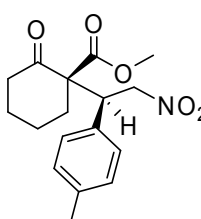

| # | Name | RT     | Area[uV.Sec] | Quantity |
|---|------|--------|--------------|----------|
| 1 |      | 23.875 | 707145.501   | 0.000    |
| 2 |      | 25.892 | 668944.701   | 0.000    |
| 3 |      | 35.267 | 13748602.776 | 0.000    |
| 4 |      | 41.950 | 12519083.891 | 0.000    |

Total Area of Peak = 27643776.869 [uV.Sec]

HPLC [Chiralcel OJ-H, hexane/2-propanol = 80/20, 0.5 mL/min,  $\lambda = 210$  nm, retention times: (major enantiomer) 41.9 min, (minor enantiomer) 25.8 min, (minor diastereomers) 35.2, 23.8 min].

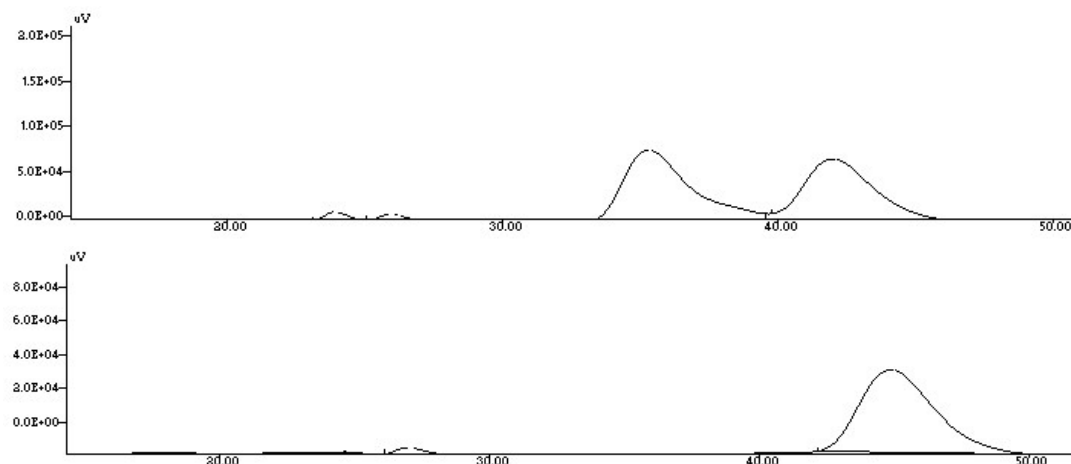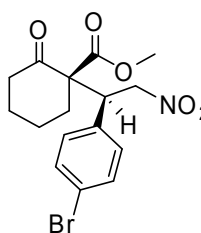

| # | Name | RT     | Area[uV.Sec] | Quantity |
|---|------|--------|--------------|----------|
| 1 |      | 17.783 | 64424.000    | 0.000    |
| 2 |      | 19.742 | 75275.000    | 0.000    |
| 3 |      | 38.500 | 9593487.875  | 0.000    |
| 4 |      | 42.942 | 12434138.625 | 0.000    |

Total Area of Peak = 22167325.500 [uV.Sec]

HPLC [Chiralcel OJ-H, hexane/2-propanol = 80/20, 0.5 mL/min,  $\lambda = 210$  nm, retention times: (major enantiomer) 42.9 min, (minor enantiomer) 38.5 min, (minor diastereomers) 17.7, 19.7 min].

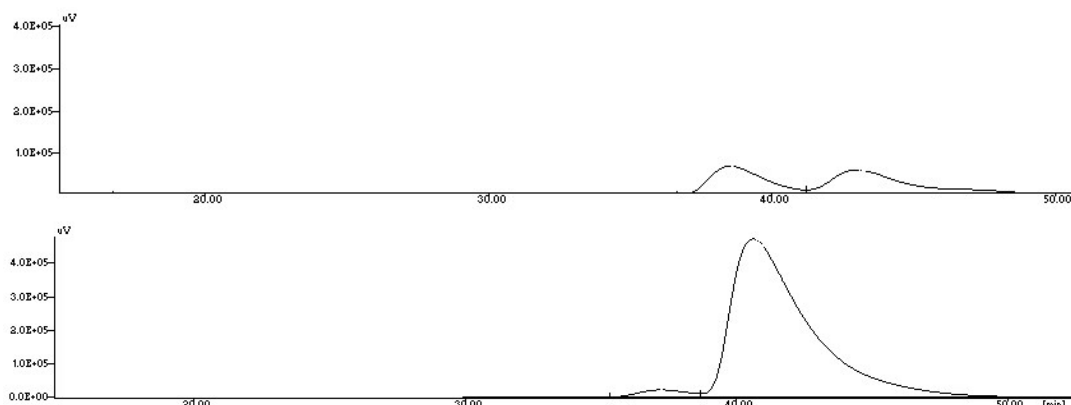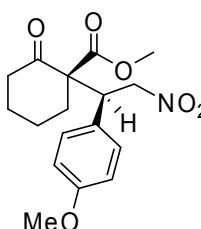

| # | Name | RT     | Area[uV.Sec] | Quantity |
|---|------|--------|--------------|----------|
| 1 |      | 46.125 | 422053.658   | 0.000    |
| 2 |      | 57.408 | 360830.957   | 0.000    |
| 3 |      | 76.758 | 2534193.945  | 0.000    |
| 4 |      | 92.450 | 3004670.000  | 0.000    |

Total Area of Peak = 6321748.560 [uV.Sec]

HPLC [Chiralcel OJ-H, hexane/2-propanol = 80/20, 0.5 mL/min,  $\lambda$  = 210 nm, retention times: (major enantiomer) 92.4 min, (minor enantiomer) 76.7 min, (minor diastereomers) 46.1, 57.4 min].

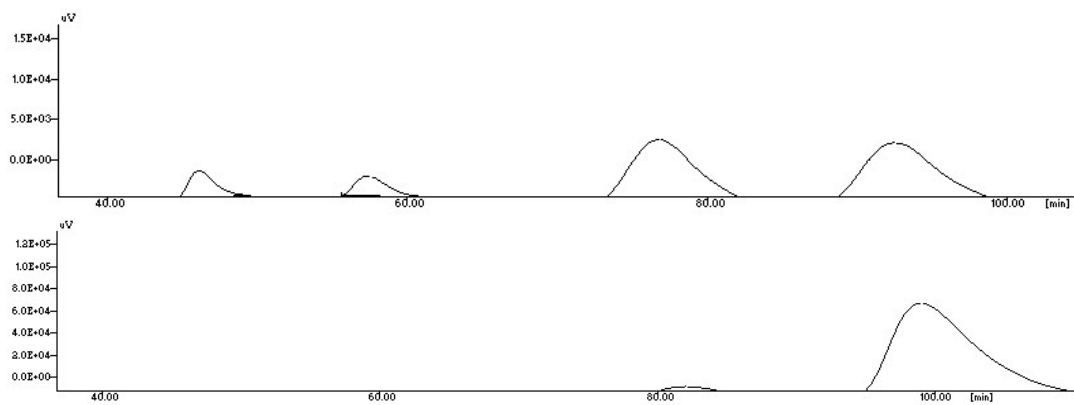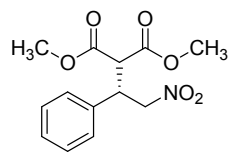

racemic

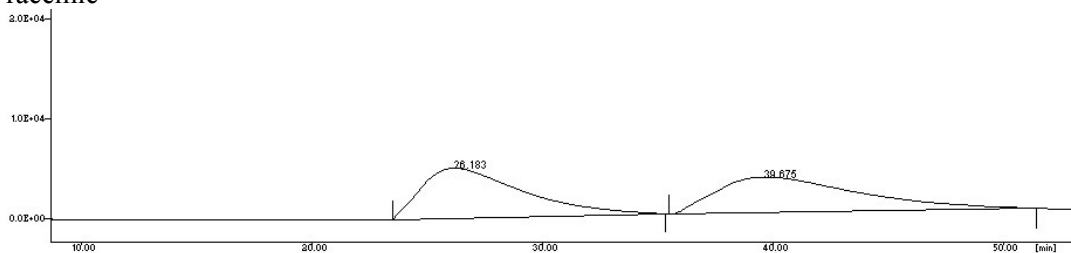

| # | Name | RT     | Area[uV.Sec] | Quantity |
|---|------|--------|--------------|----------|
| 1 |      | 26.183 | 1542949.250  | 0.000    |
| 2 |      | 39.675 | 1517415.518  | 0.000    |

Total Area of Peak = 3060364.768 [uV.Sec]

asymmetric

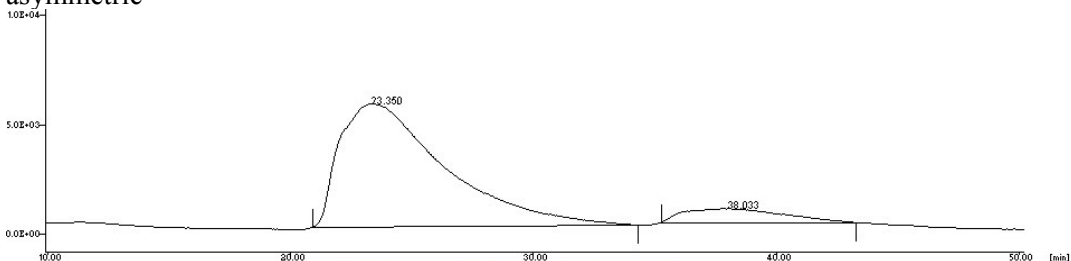

| # | Name | RT     | Area[uV.Sec] | Quantity |
|---|------|--------|--------------|----------|
| 1 |      | 23.350 | 1665563.654  | 0.000    |
| 2 |      | 38.033 | 182731.754   | 0.000    |

Total Area of Peak = 1848295.407 [uV.Sec]

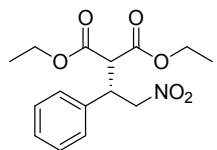

Racemic mixture

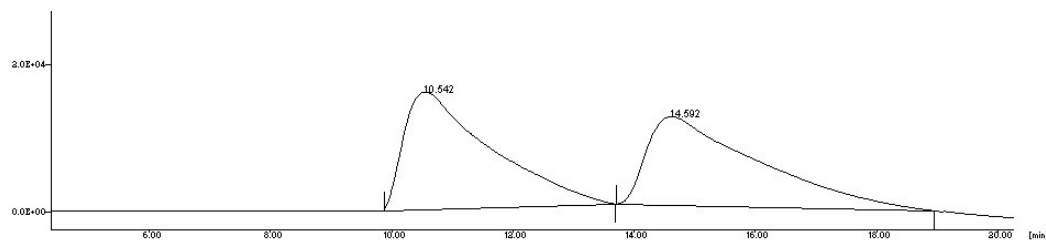

| # | Name | RT     | Area[uV.Sec] | Quantity |
|---|------|--------|--------------|----------|
| 1 |      | 10.542 | 1553861.500  | 0.000    |
| 2 |      | 14.592 | 1514396.259  | 0.000    |

Total Area of Peak = 3068257.759 [uV.Sec]

asymmetric

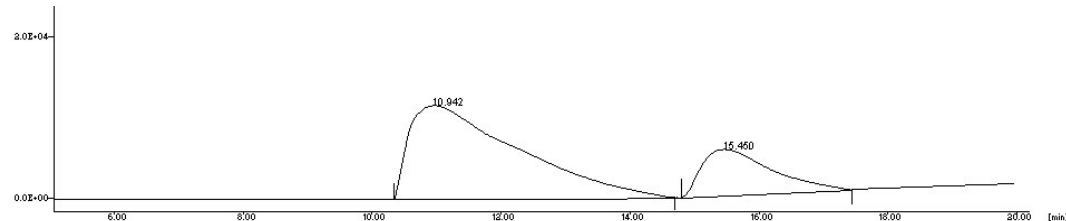

| # | Name | RT     | Area[uV.Sec] | Quantity |
|---|------|--------|--------------|----------|
| 1 |      | 10.942 | 1398174.488  | 0.000    |
| 2 |      | 15.450 | 429596.250   | 0.000    |

Total Area of Peak = 1827770.738 [uV.Sec]

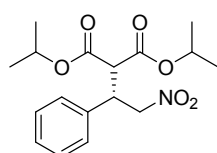

racemic

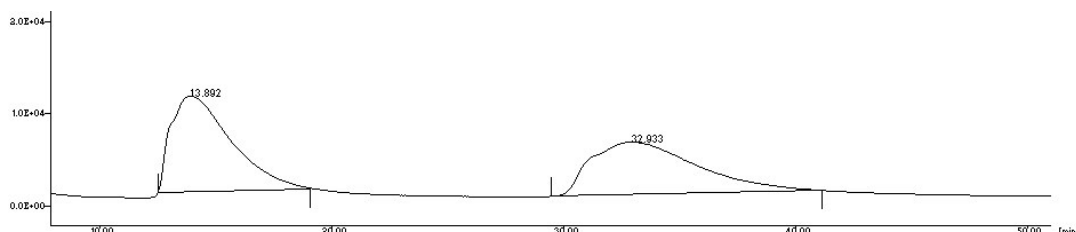

| # | Name | RT     | Area[uV.Sec] | Quantity |
|---|------|--------|--------------|----------|
| 1 |      | 13.892 | 1836013.500  | 0.000    |
| 2 |      | 32.933 | 1790358.272  | 0.000    |

Total Area of Peak = 3626371.772 [uV.Sec]

asymmetric

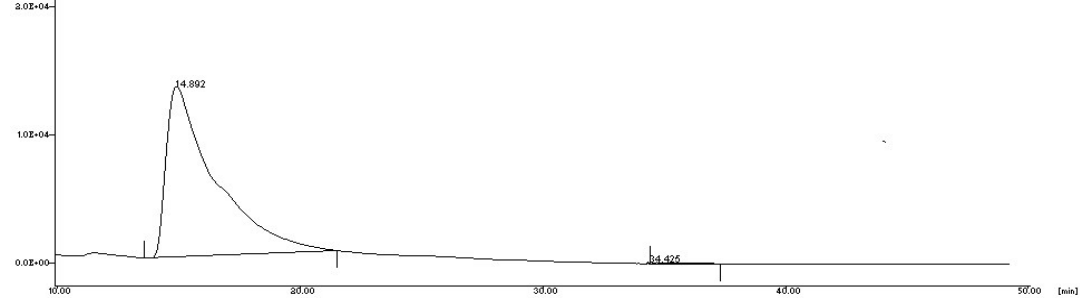

| # | Name | RT     | Area[uV.Sec] | Quantity |
|---|------|--------|--------------|----------|
| 1 |      | 14.892 | 1819330.618  | 0.000    |
| 2 |      | 34.425 | 7135.957     | 0.000    |

Total Area of Peak = 1826466.575 [uV.Sec]

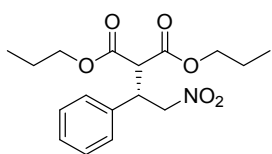

racemic

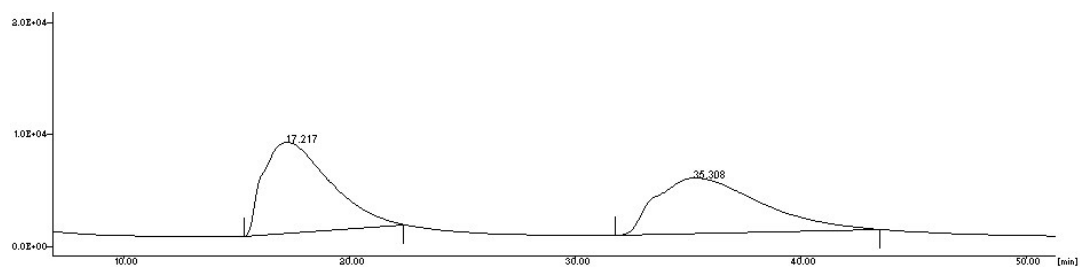

| # | Name | RT     | Area[uV.Sec] | Quantity |
|---|------|--------|--------------|----------|
| 1 |      | 17.217 | 1630453.750  | 0.000    |
| 2 |      | 35.308 | 1582824.235  | 0.000    |

Total Area of Peak = 3213277.985 [uV.Sec]

asymmetric

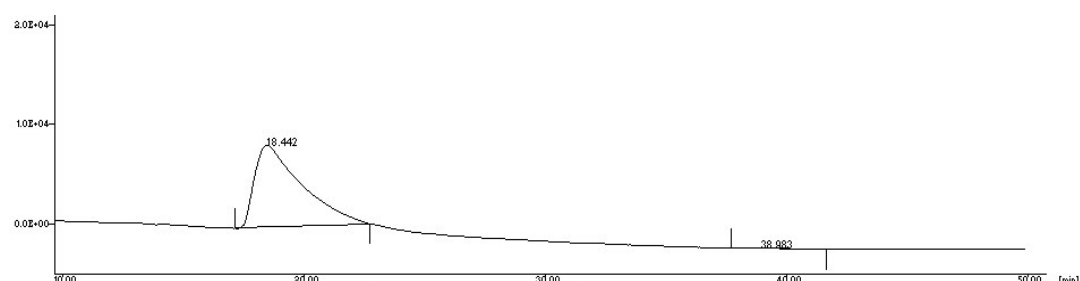

| # | Name | RT     | Area[uV.Sec] | Quantity |
|---|------|--------|--------------|----------|
| 1 |      | 18.442 | 1095668.083  | 0.000    |
| 2 |      | 38.983 | 10333.713    | 0.000    |

Total Area of Peak = 1105993.796 [uV.Sec]

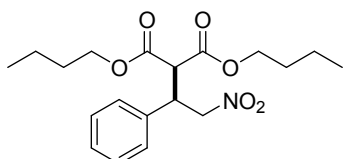

racemic

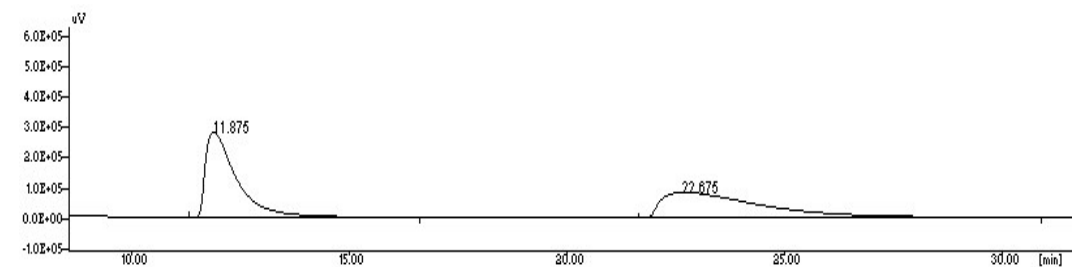

| # | Name | RT     | Area[uV.Sec] | Quantity |
|---|------|--------|--------------|----------|
| 1 |      | 11.875 | 13421786.797 | 0.000    |
| 2 |      | 22.675 | 13376909.000 | 0.000    |

Total Area of Peak = 26798695.797 [uV.Sec]

asymmetric

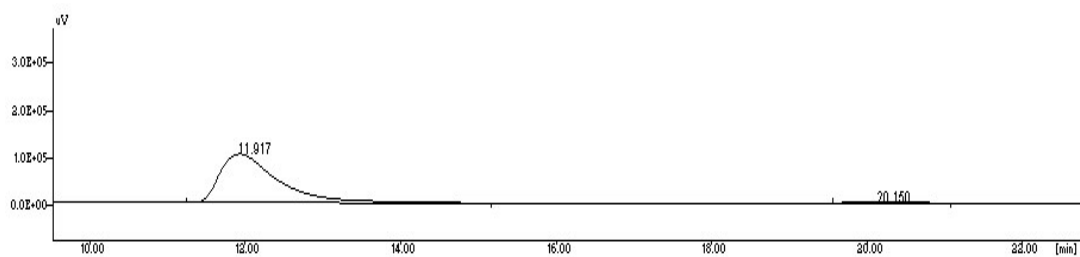

| # | Name | RT     | Area[uV.Sec] | Quantity |
|---|------|--------|--------------|----------|
| 1 |      | 11.917 | 5341073.000  | 0.000    |
| 2 |      | 20.150 | 164684.000   | 0.000    |

Total Area of Peak = 5505757.000 [uV.Sec]

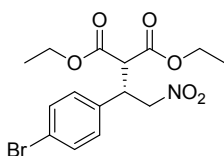

racemic

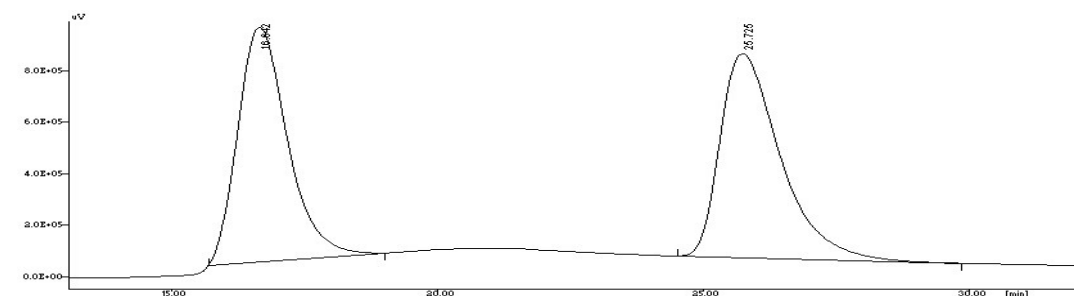

| # | Name | RT     | Area[uV.Sec] | Quantity |
|---|------|--------|--------------|----------|
| 1 |      | 16.642 | 60491517.000 | 0.000    |
| 2 |      | 25.725 | 61270776.944 | 0.000    |

Total Area of Peak = 121762293.940 [uV.Sec]

asymmetric

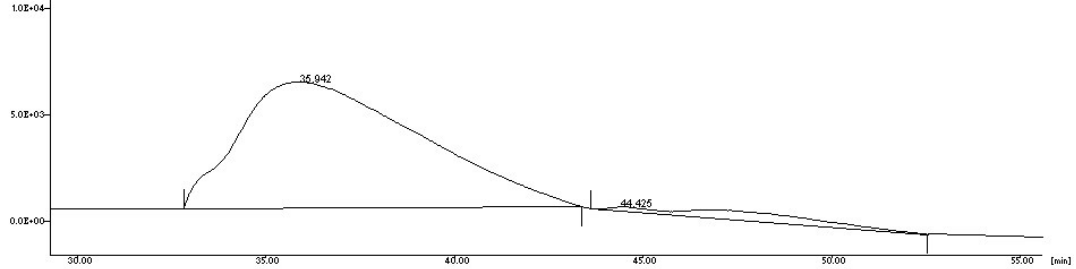

| # | Name | RT     | Area[uU.Sec] | Quantity |
|---|------|--------|--------------|----------|
| 1 |      | 35.942 | 1972322.854  | 0.000    |
| 2 |      | 44.425 | 119808.443   | 0.000    |

Total Area of Peak = 2092131.297 [uU.Sec]

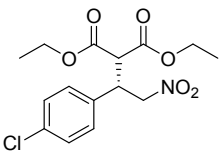

racemic

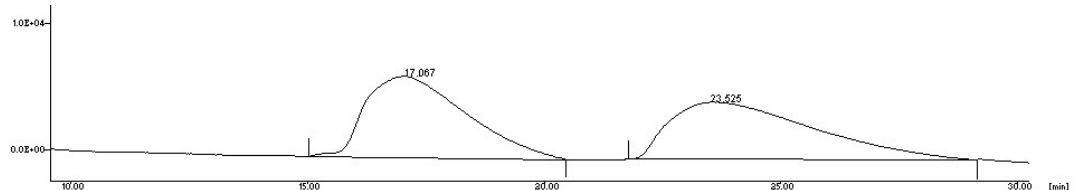

| # | Name | RT     | Area[uU.Sec] | Quantity |
|---|------|--------|--------------|----------|
| 1 |      | 17.067 | 932562.750   | 0.000    |
| 2 |      | 23.525 | 943874.557   | 0.000    |

Total Area of Peak = 1876437.307 [uU.Sec]

asymmetric

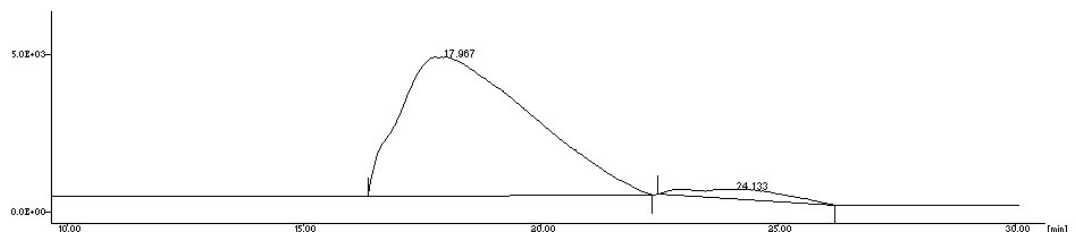

| # | Name | RT     | Area[uU.Sec] | Quantity |
|---|------|--------|--------------|----------|
| 1 |      | 17.967 | 829056.000   | 0.000    |
| 2 |      | 24.133 | 39260.000    | 0.000    |

Total Area of Peak = 868316.000 [uU.Sec]

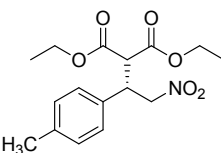

racemic

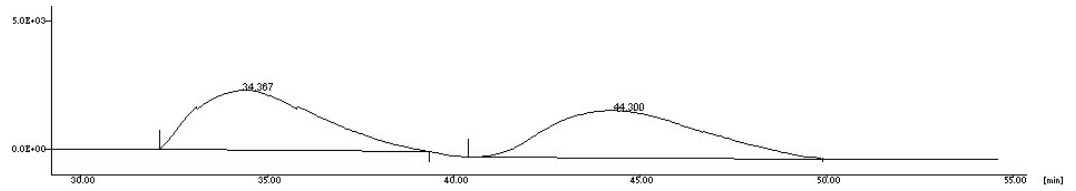

| # | Name | RT     | Area[uU.Sec] | Quantity |
|---|------|--------|--------------|----------|
| 1 |      | 34.367 | 528153.367   | 0.000    |
| 2 |      | 44.300 | 522110.714   | 0.000    |

Total Area of Peak = 1050264.081 [uU.Sec]

asymmetric

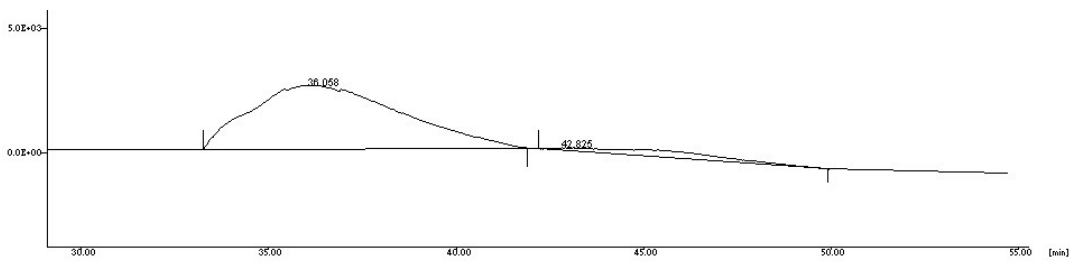

| # | Name | RT     | Area[uU.Sec] | Quantity |
|---|------|--------|--------------|----------|
| 1 |      | 36.058 | 714876.500   | 0.000    |
| 2 |      | 42.825 | 68679.473    | 0.000    |

Total Area of Peak = 783555.973 [uU.Sec]

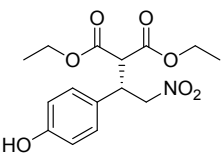

racemic

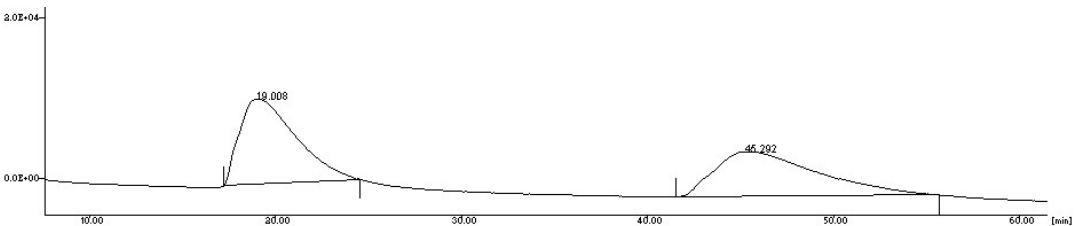

| # | Name | RT     | Area[uU.Sec] | Quantity |
|---|------|--------|--------------|----------|
| 1 |      | 19.008 | 2185303.500  | 0.000    |
| 2 |      | 45.292 | 2130083.798  | 0.000    |

Total Area of Peak = 4315387.298 [uU.Sec]

asymmetric



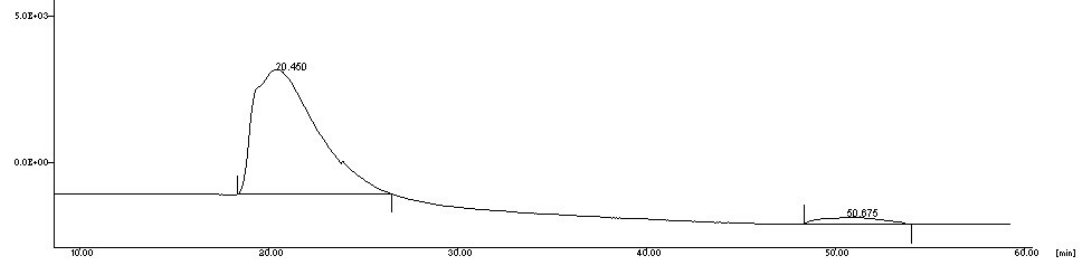

| # | Name | RT     | Area[uU.Sec] | Quantity |
|---|------|--------|--------------|----------|
| 1 |      | 20.450 | 977542.507   | 0.000    |
| 2 |      | 50.675 | 52967.106    | 0.000    |

Total Area of Peak = 1030509.613 [uU.Sec]

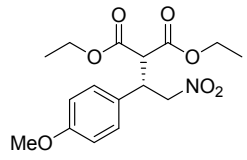

racemic

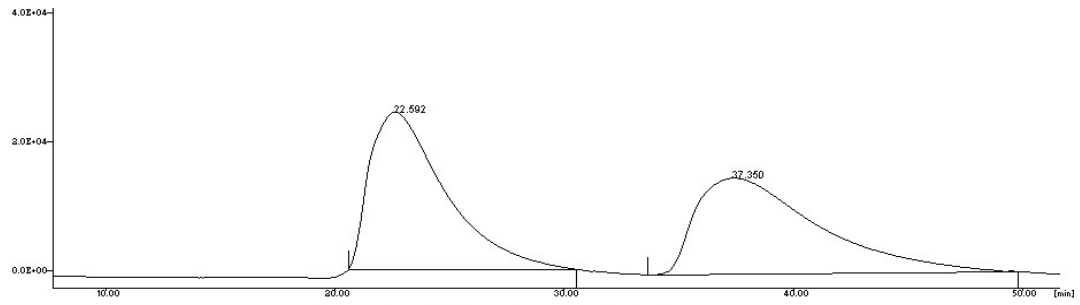

| # | Name | RT     | Area[uU.Sec] | Quantity |
|---|------|--------|--------------|----------|
| 1 |      | 22.592 | 5516004.082  | 0.000    |
| 2 |      | 37.350 | 5478535.787  | 0.000    |

Total Area of Peak = 10994619.870 [uU.Sec]

asymmetric

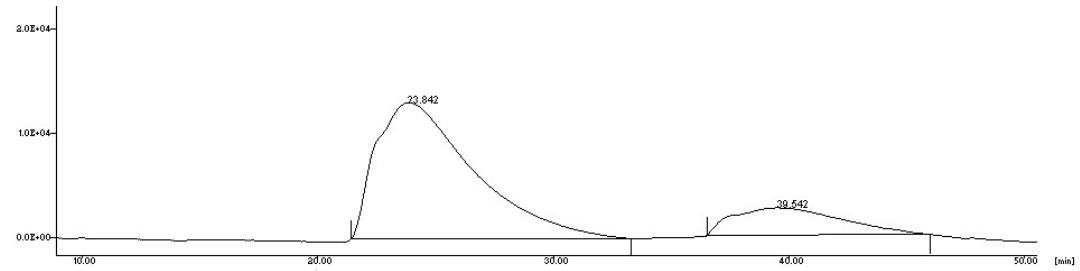

| # | Name | RT     | Area[uU.Sec] | Quantity |
|---|------|--------|--------------|----------|
| 1 |      | 23.842 | 3696676.981  | 0.000    |
| 2 |      | 39.542 | 831848.000   | 0.000    |

Total Area of Peak = 4528524.981 [uU.Sec]

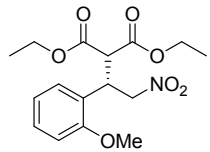

racemic

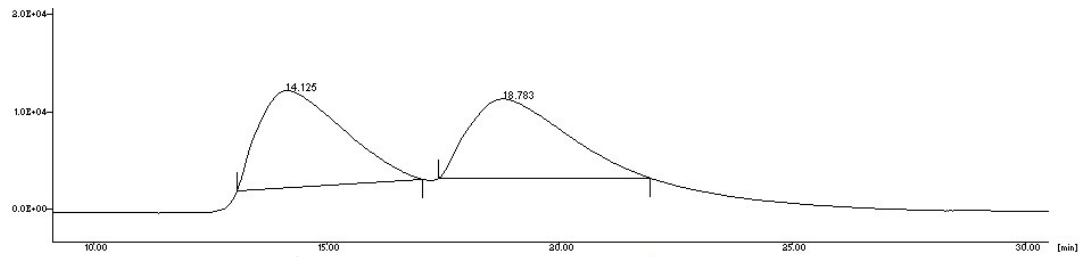

| # | Name | RT     | Area[uU.Sec] | Quantity |
|---|------|--------|--------------|----------|
| 1 |      | 14.125 | 1241599.500  | 0.000    |
| 2 |      | 18.783 | 1159655.500  | 0.000    |

Total Area of Peak = 2401255.000 [uU.Sec]

asymmetric

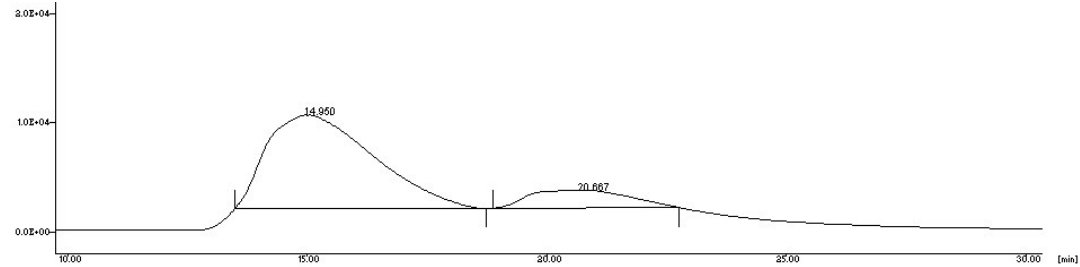

| # | Name | RT     | Area[uU.Sec] | Quantity |
|---|------|--------|--------------|----------|
| 1 |      | 14.950 | 1319133.644  | 0.000    |
| 2 |      | 20.667 | 238418.500   | 0.000    |

Total Area of Peak = 1557552.144 [uU.Sec]

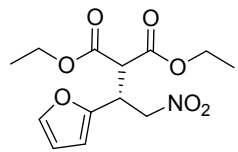

racemic

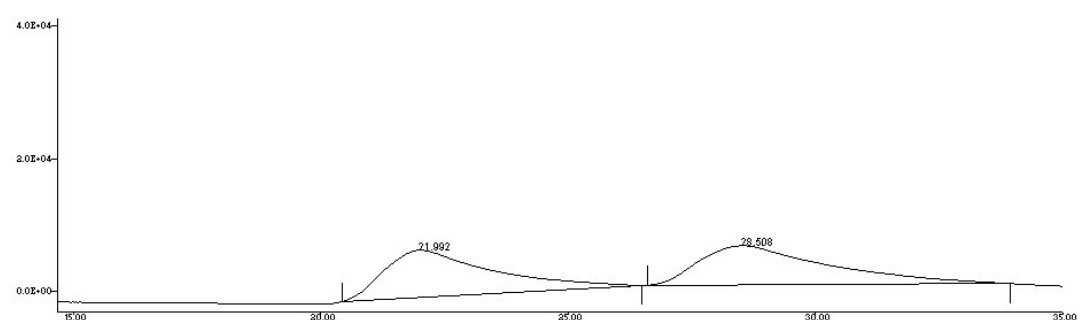

| # | Name | RT     | Area[uU.Sec] | Quantity |
|---|------|--------|--------------|----------|
| 1 |      | 21.992 | 1070477.324  | 0.000    |
| 2 |      | 28.508 | 1060758.250  | 0.000    |

Total Area of Peak = 2131235.574 [uU.Sec]

asymmetric

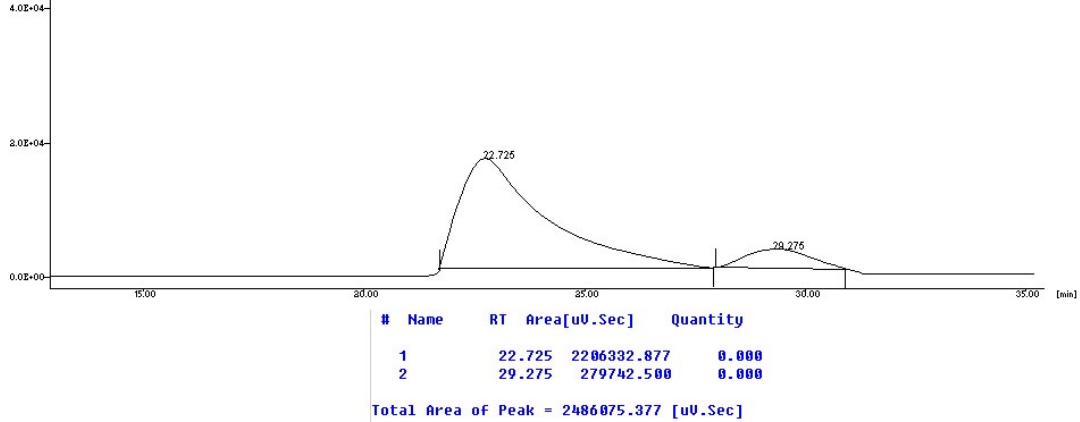

**Table 1.** Michael reactions using catalyst **1d**.

| Cycle | product   | Catalyst recovery [%] <sup>a</sup> | yield [%] <sup>a</sup> | ee [%] <sup>b</sup> |
|-------|-----------|------------------------------------|------------------------|---------------------|
| 1st   | <b>5d</b> | 99                                 | 98                     | 99                  |
| 2nd   | <b>5d</b> | 99                                 | 97                     | 99                  |
| 3rd   | <b>5d</b> | 99                                 | 97                     | 99                  |
| 4th   | <b>5d</b> | 99                                 | 97                     | 99                  |

<sup>a</sup>Isolated yield. <sup>b</sup>Determined by chiral HPLC.

1<sup>st</sup> cycle

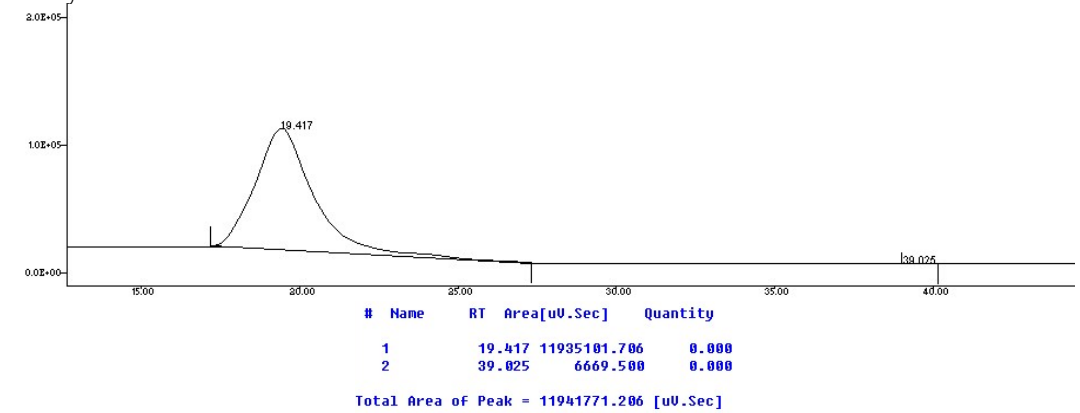

2<sup>nd</sup> cycle

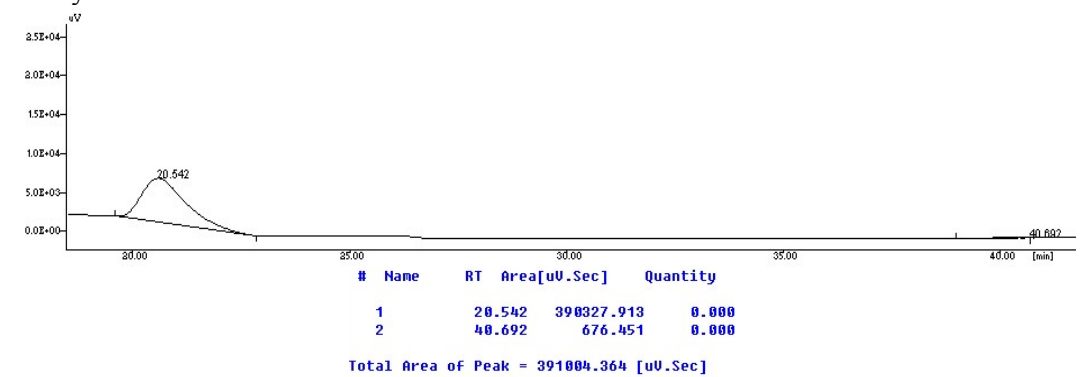

3<sup>rd</sup> cycle

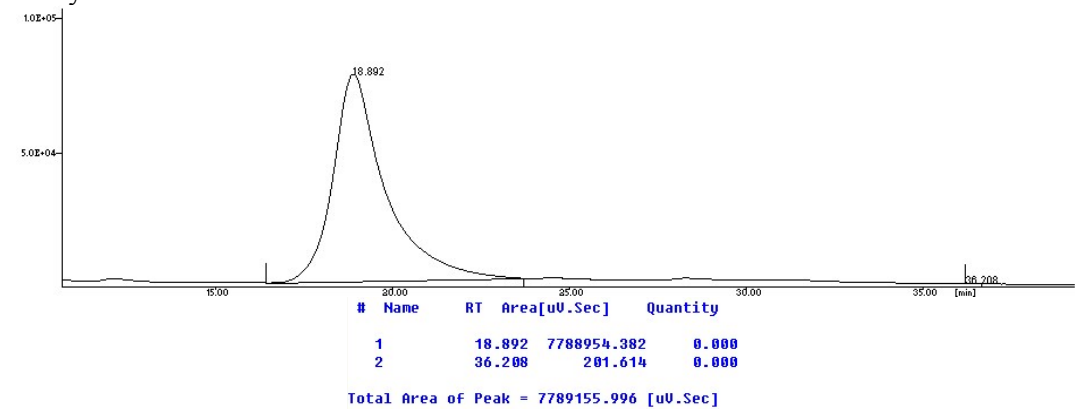

4<sup>th</sup> cycle

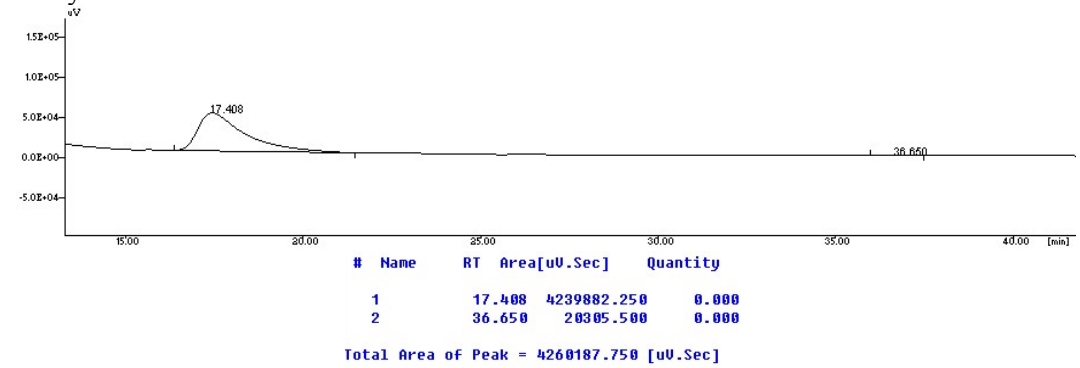

## NMR Spectra

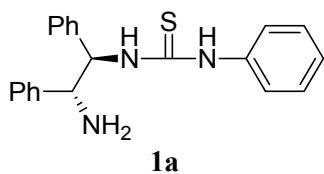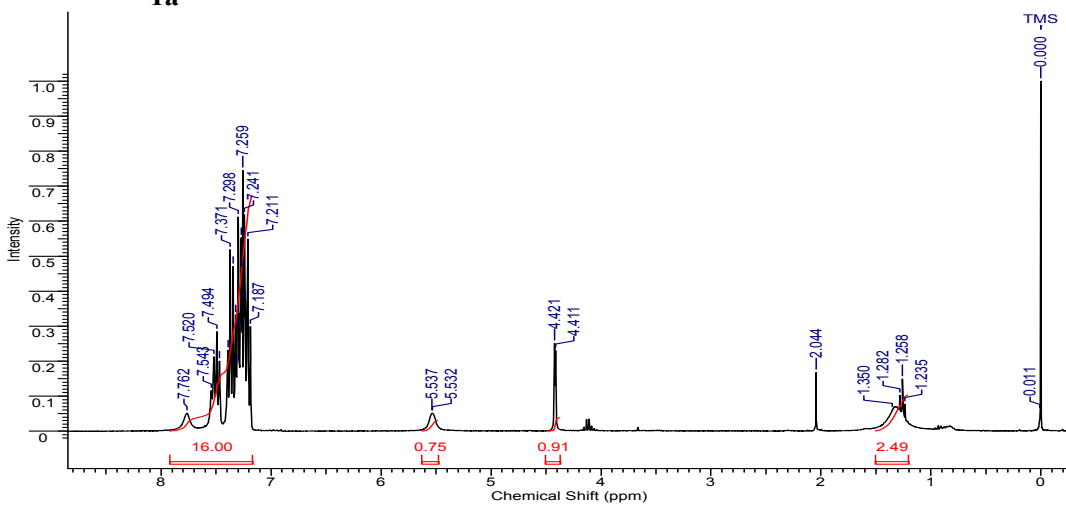

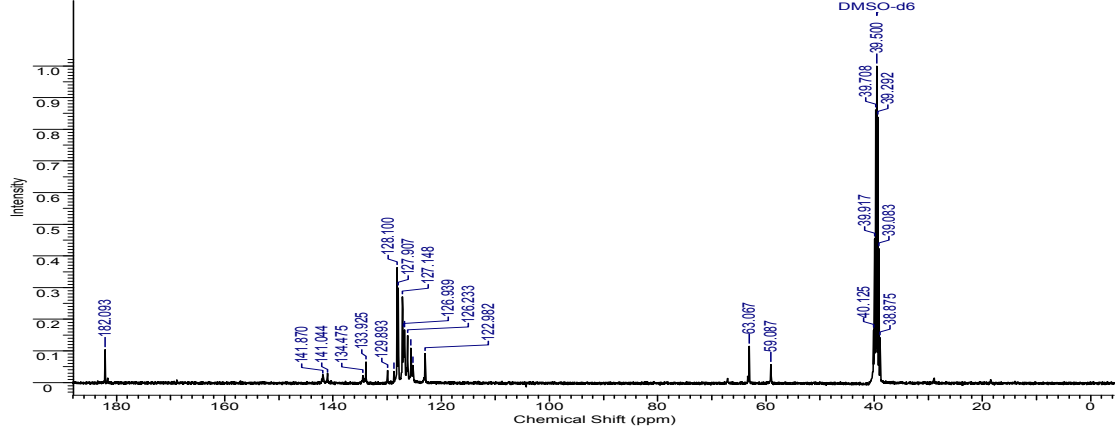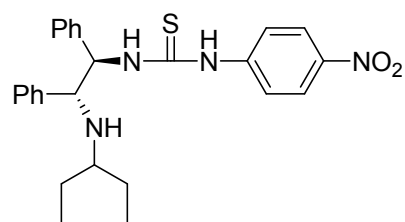

**1b**

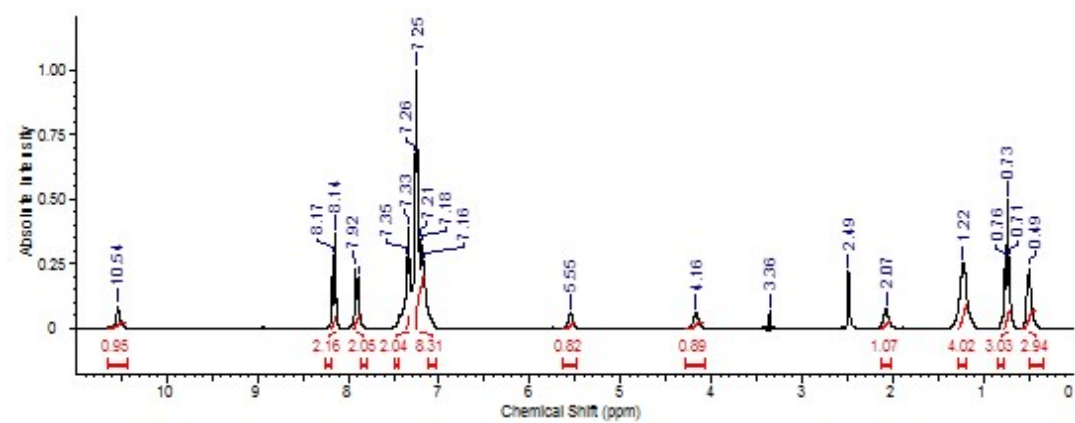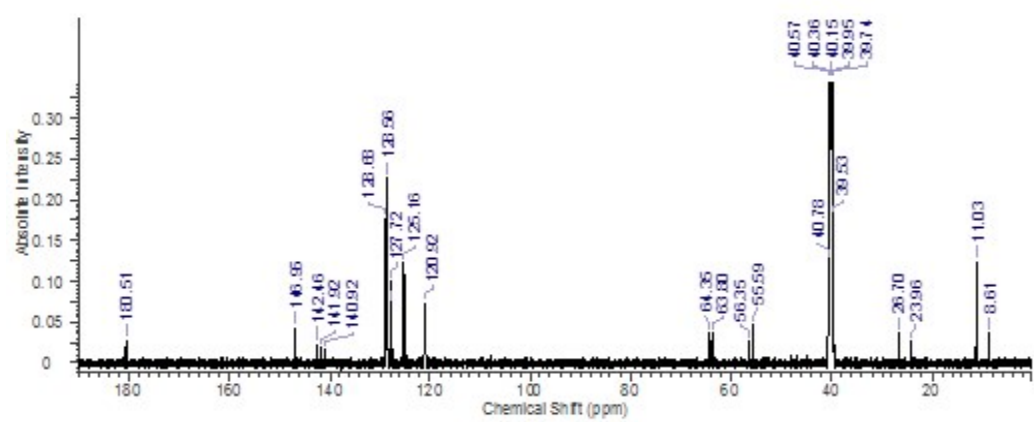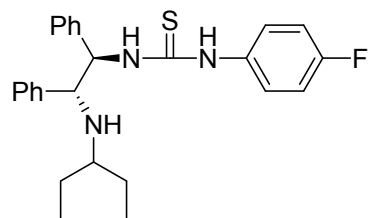

**1c**

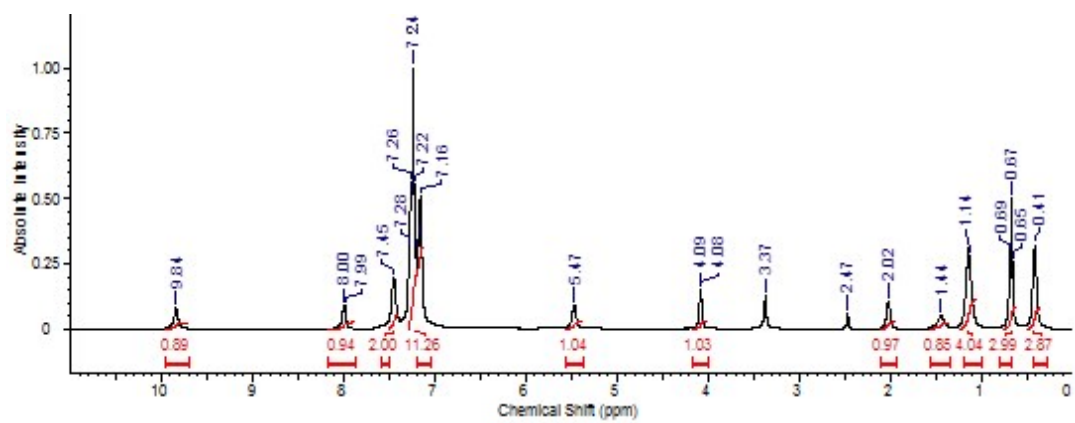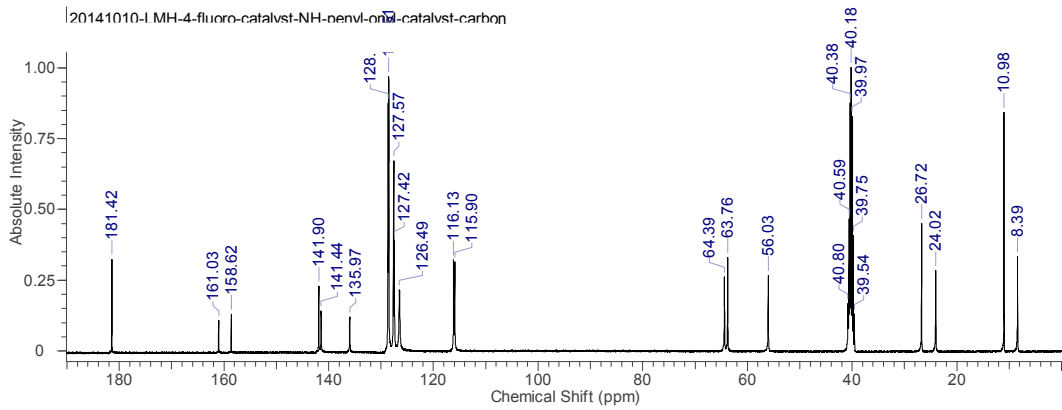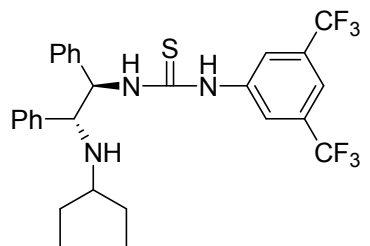

**1d**

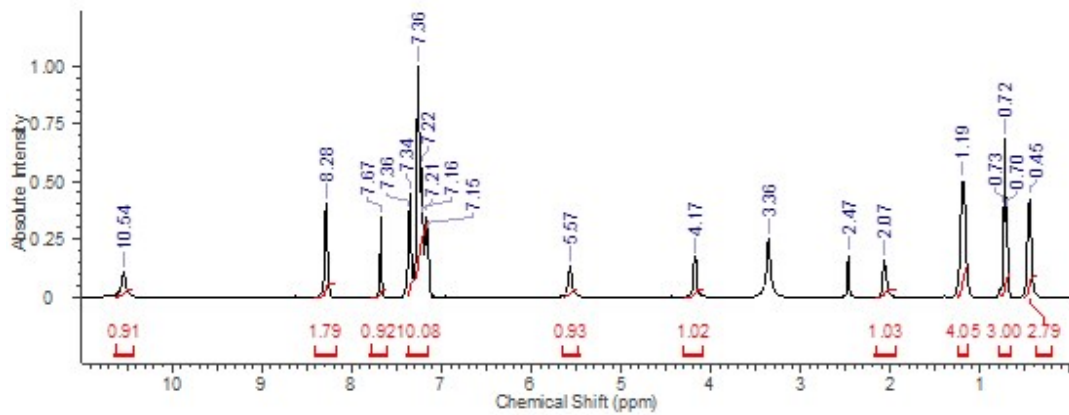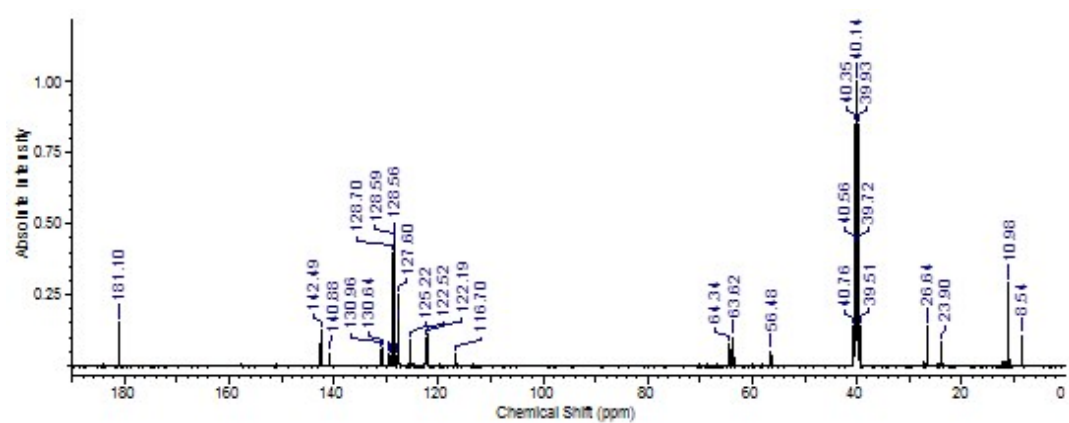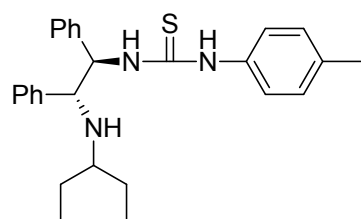

**1e**

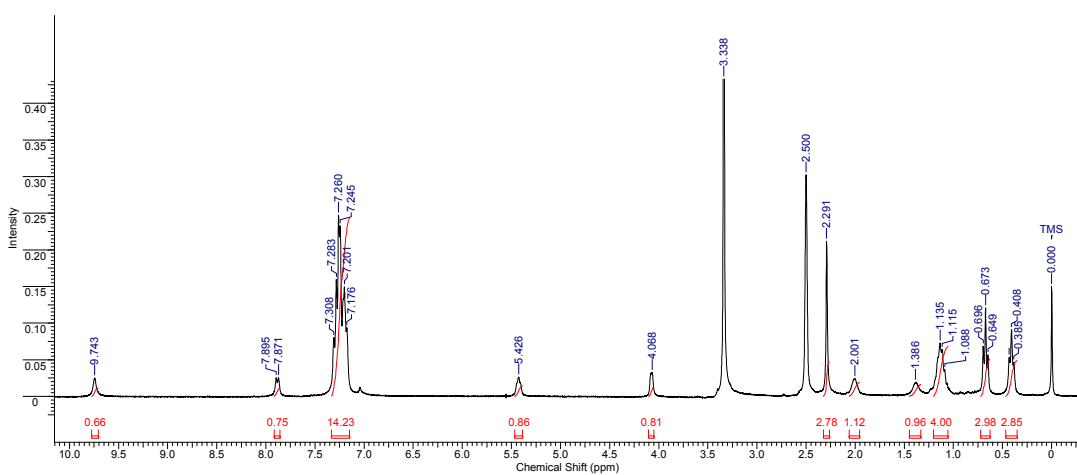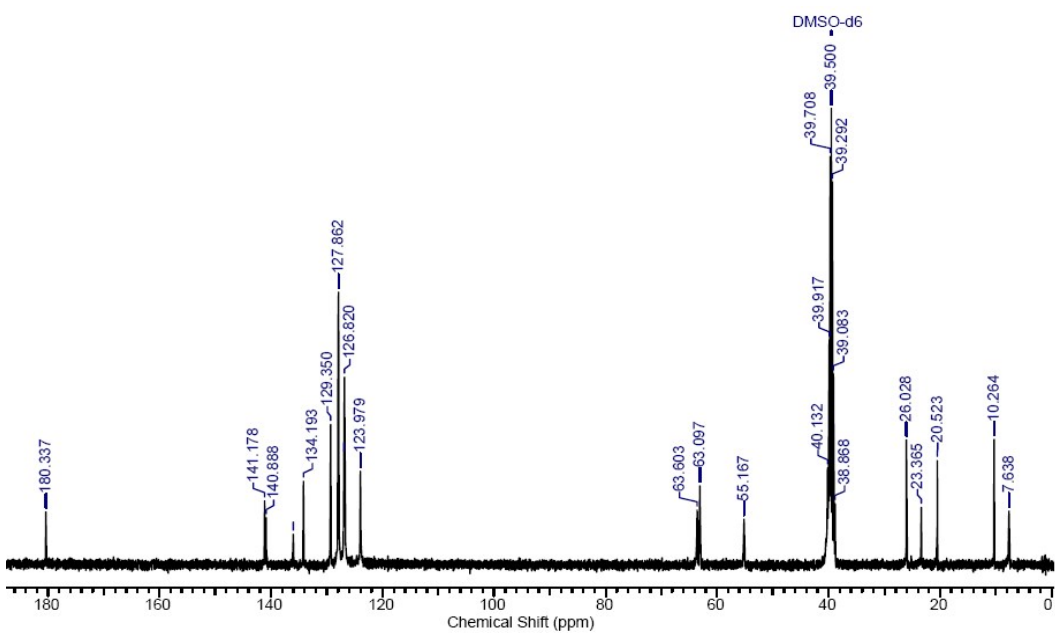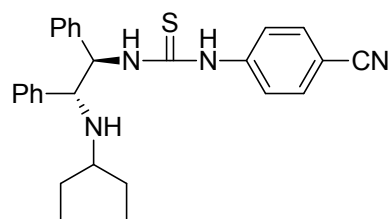

**1f**

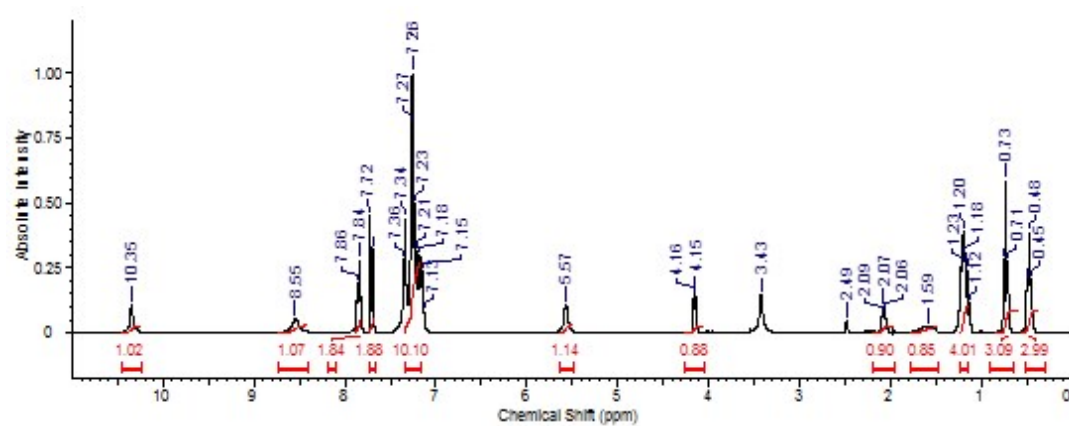

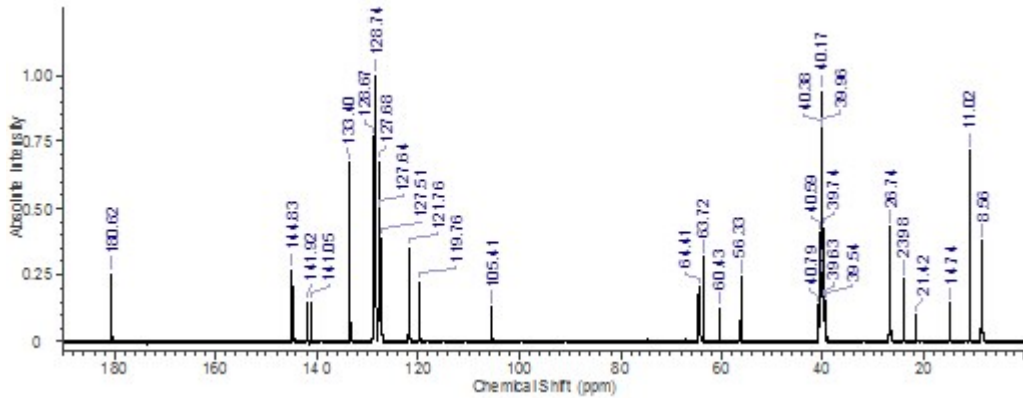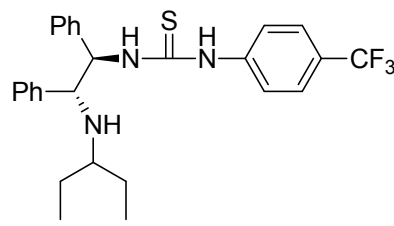

**1g**

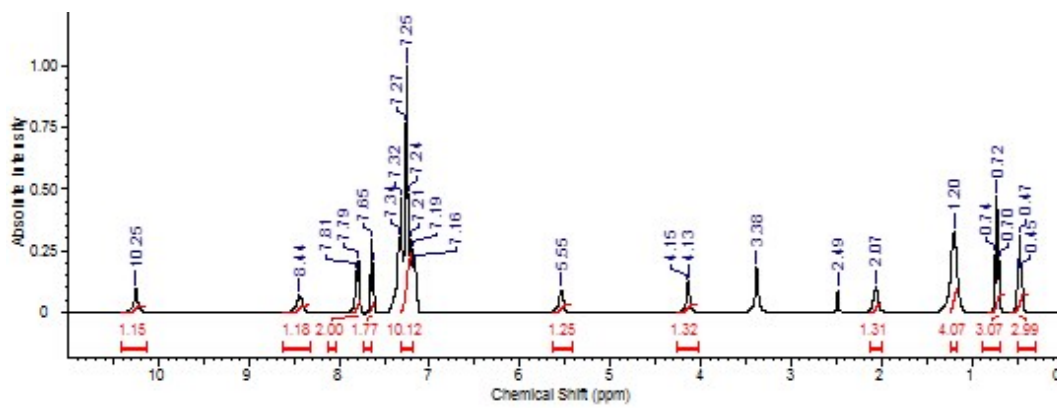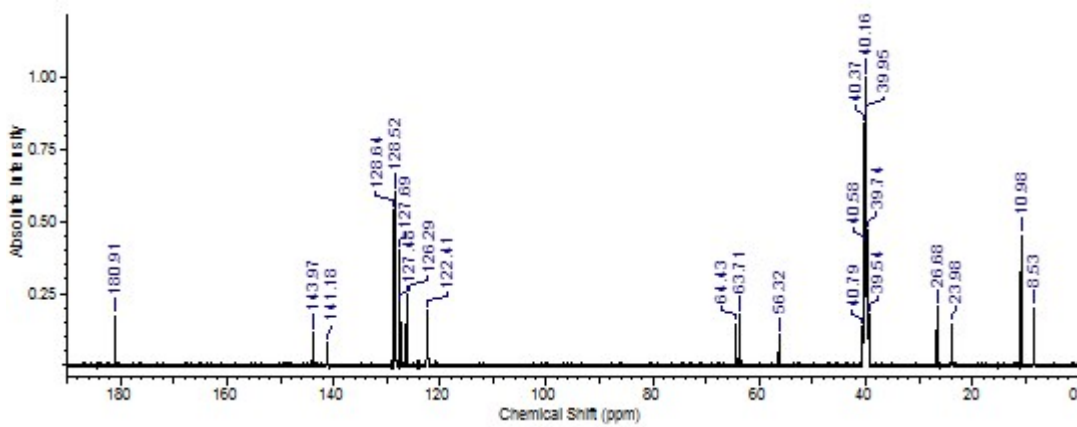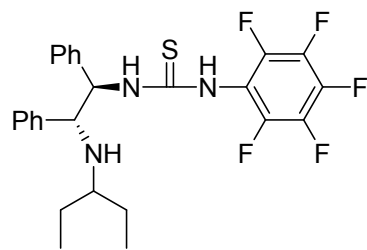

**1h**

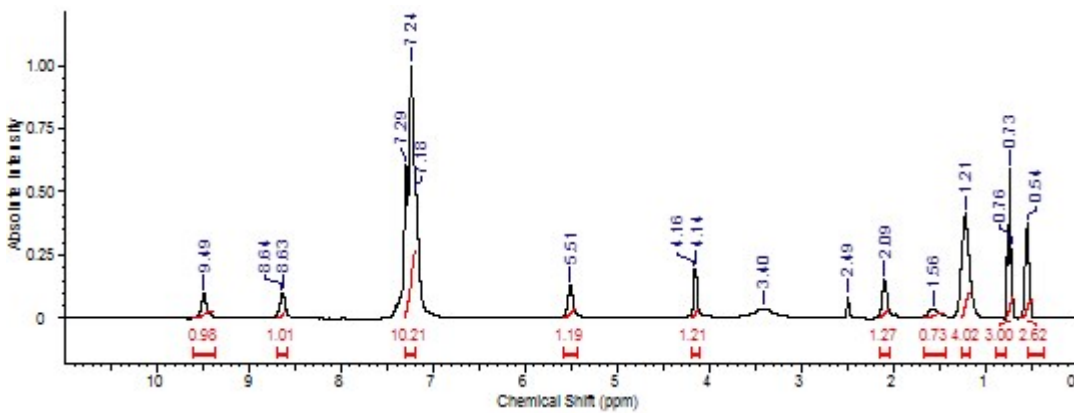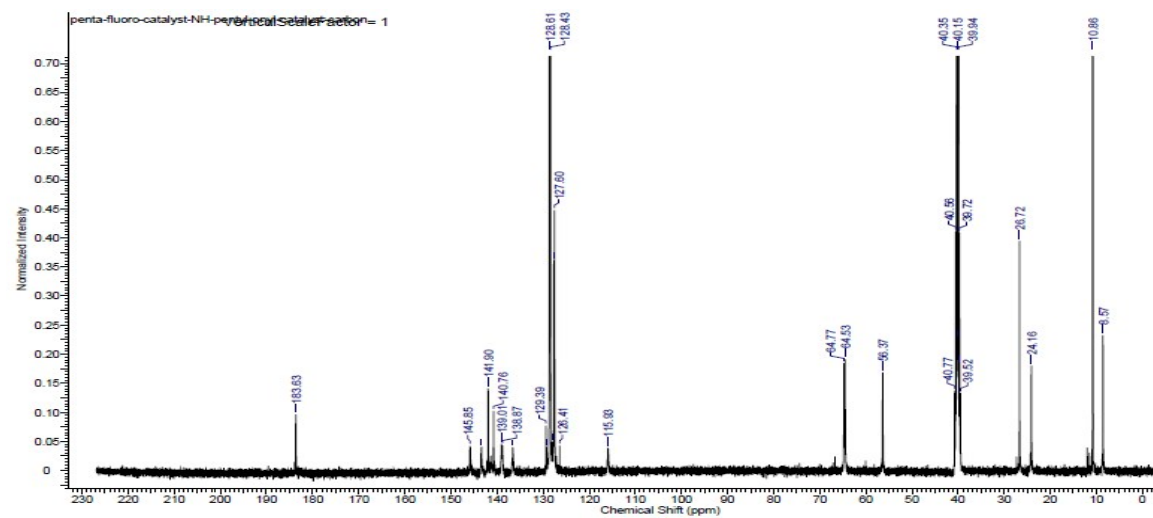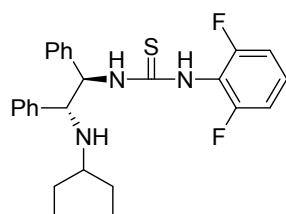

**1i**

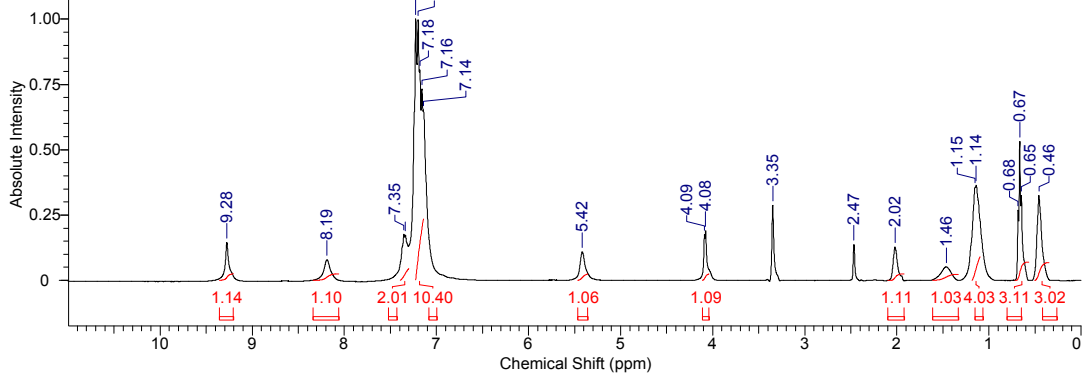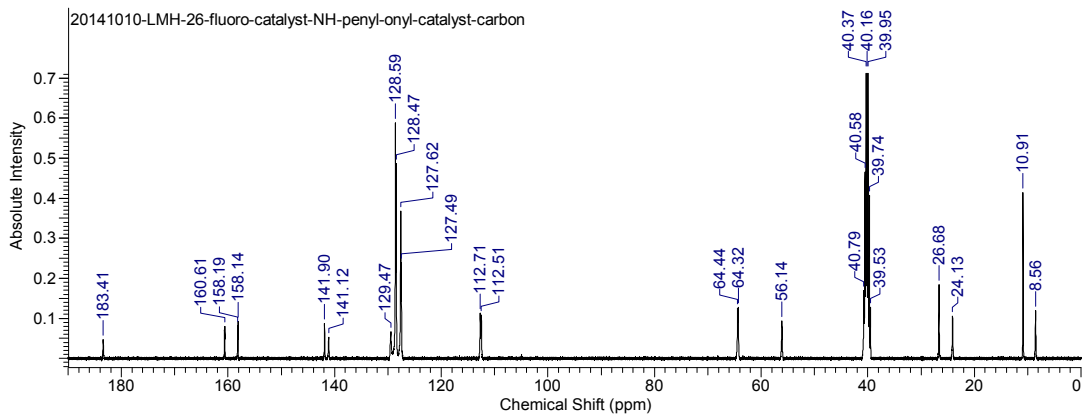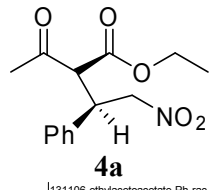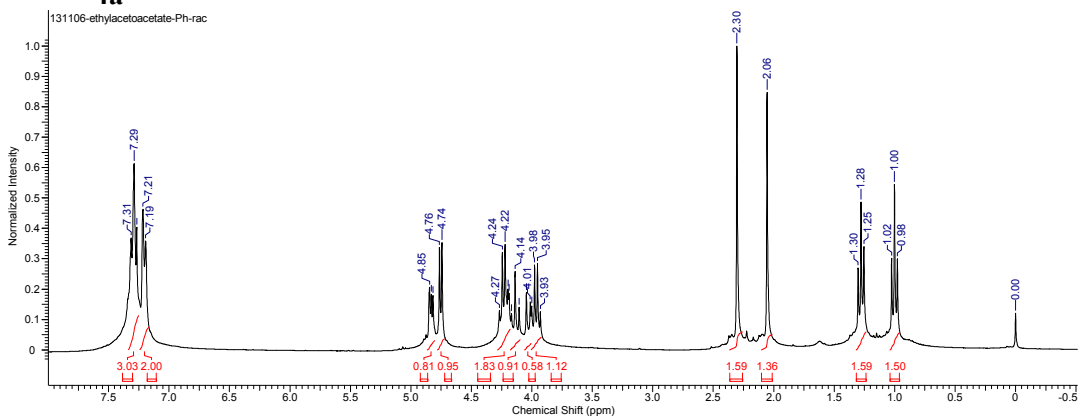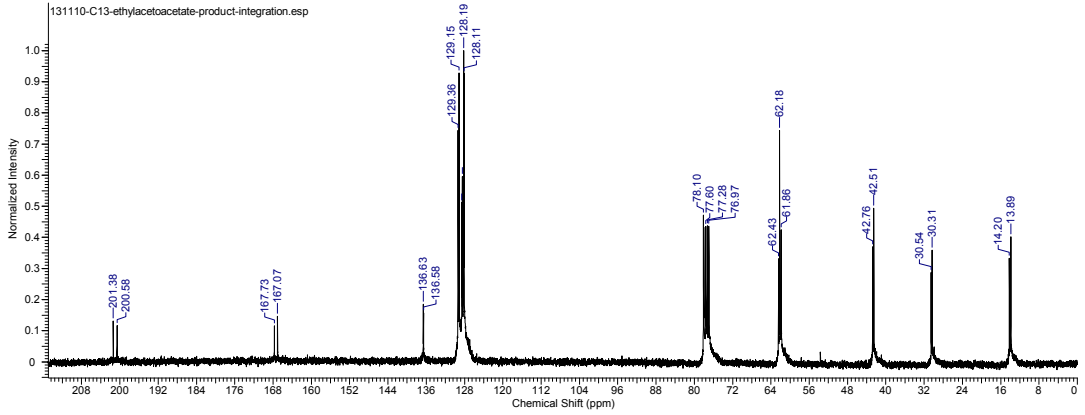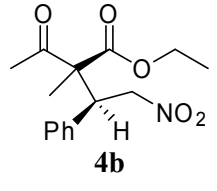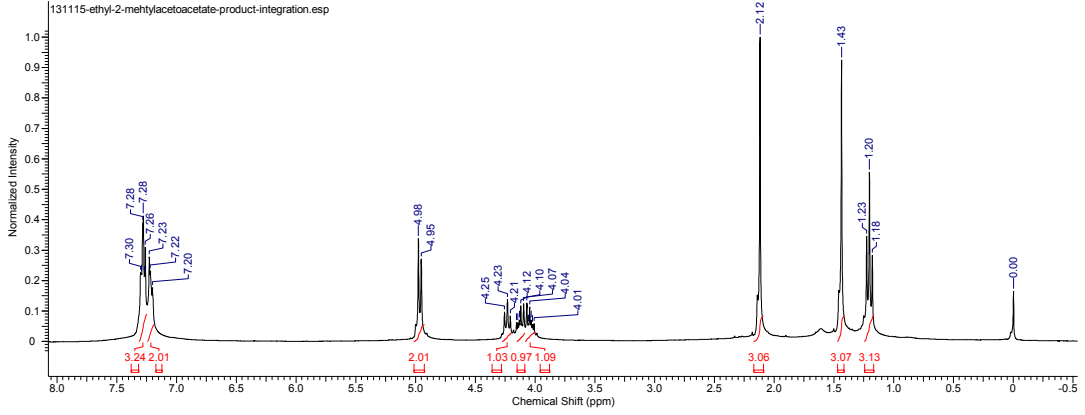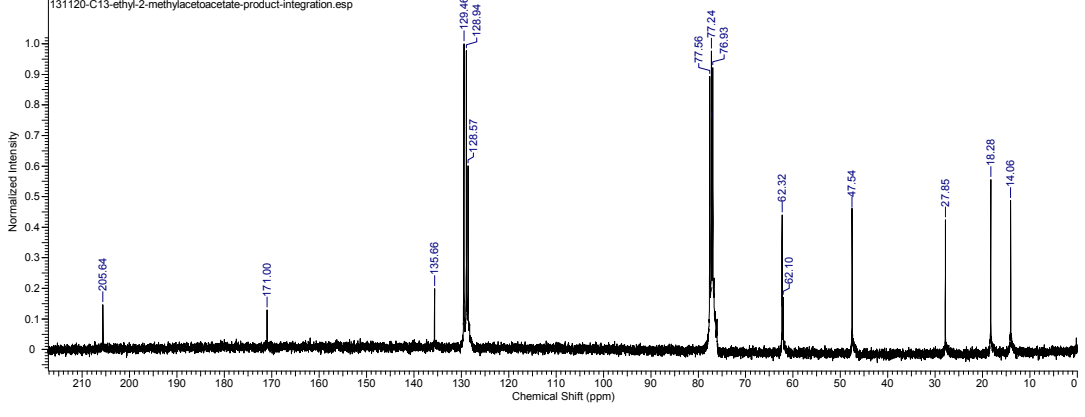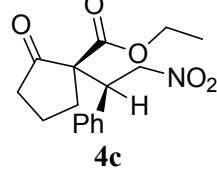



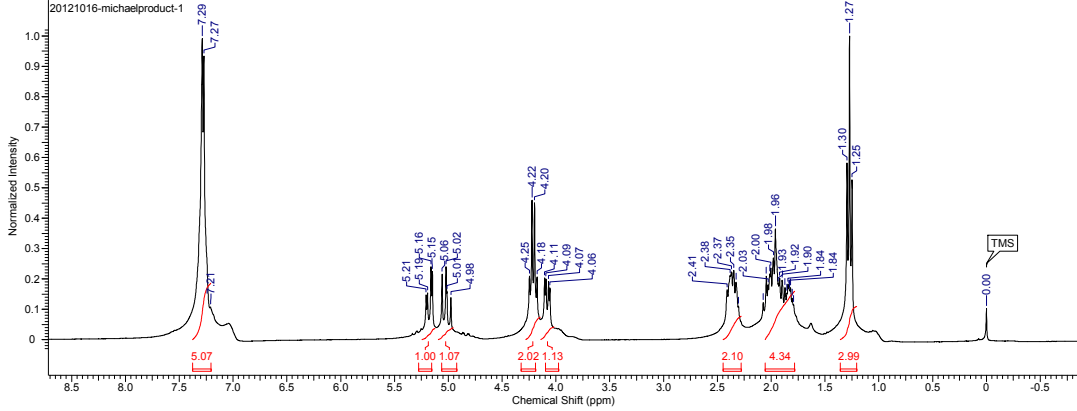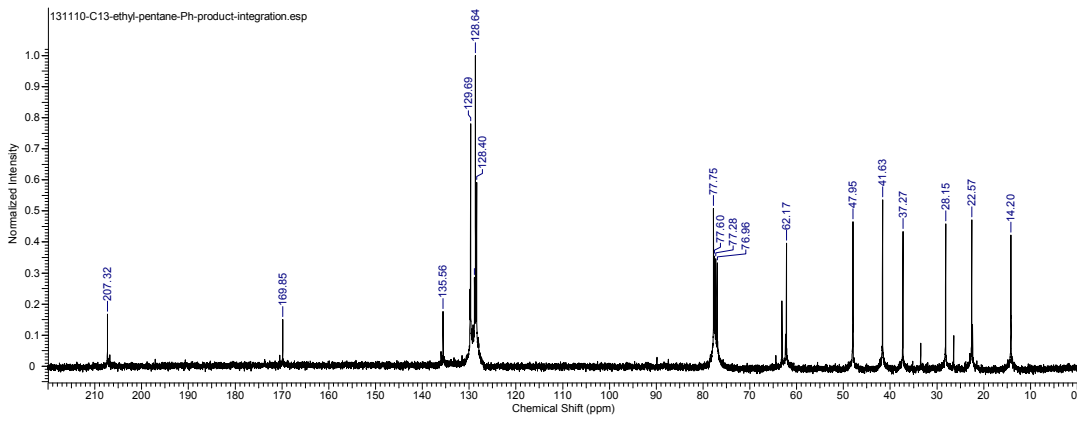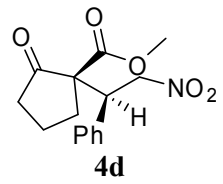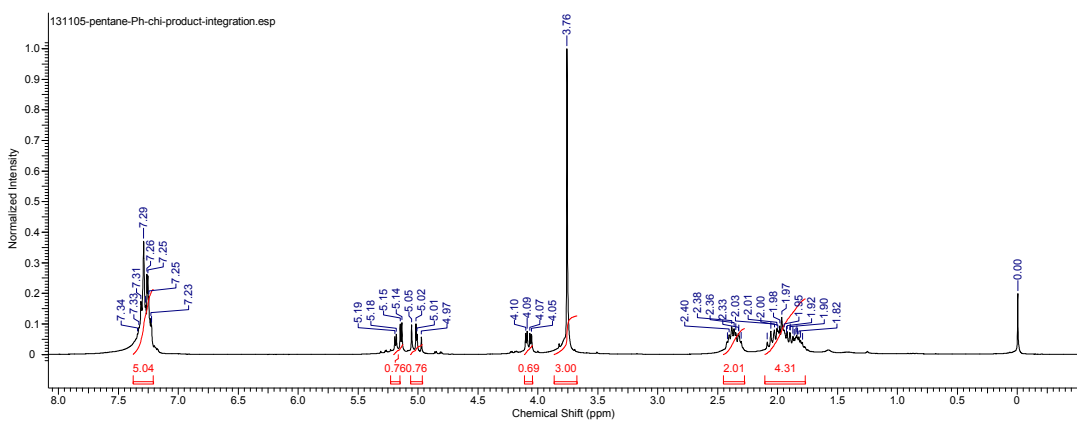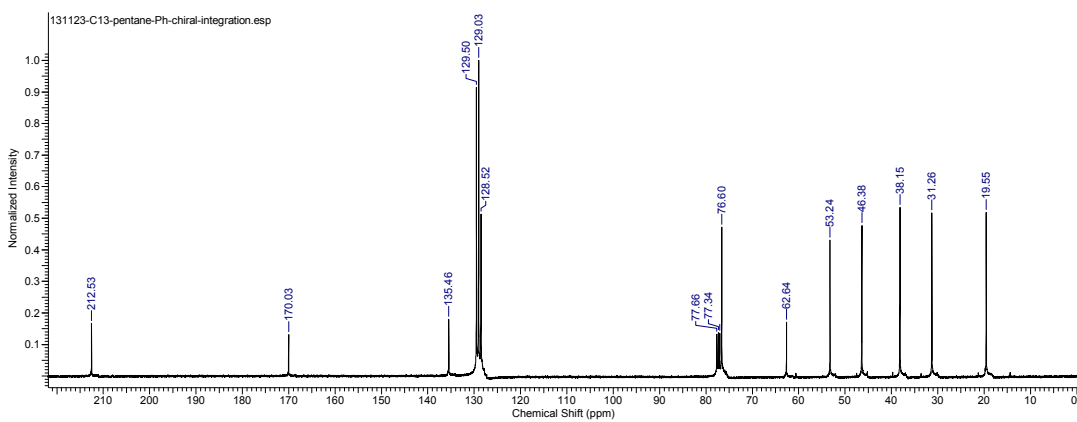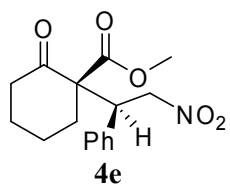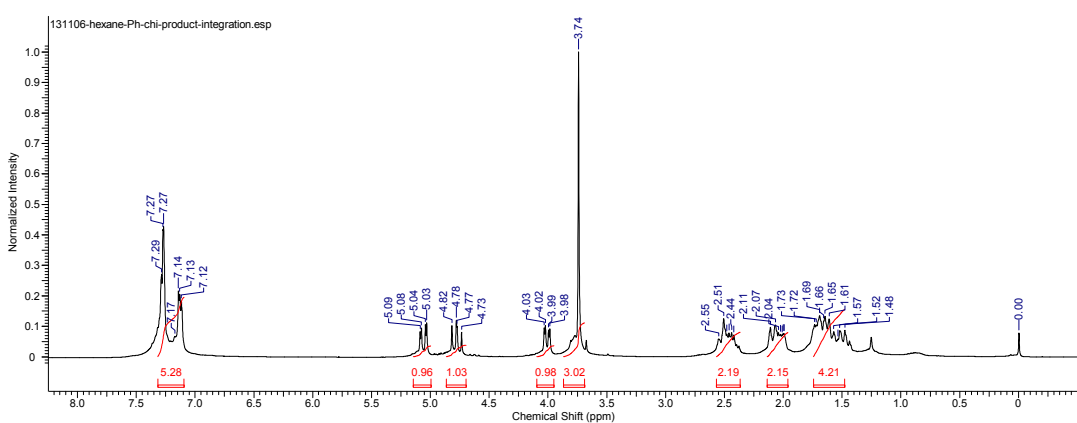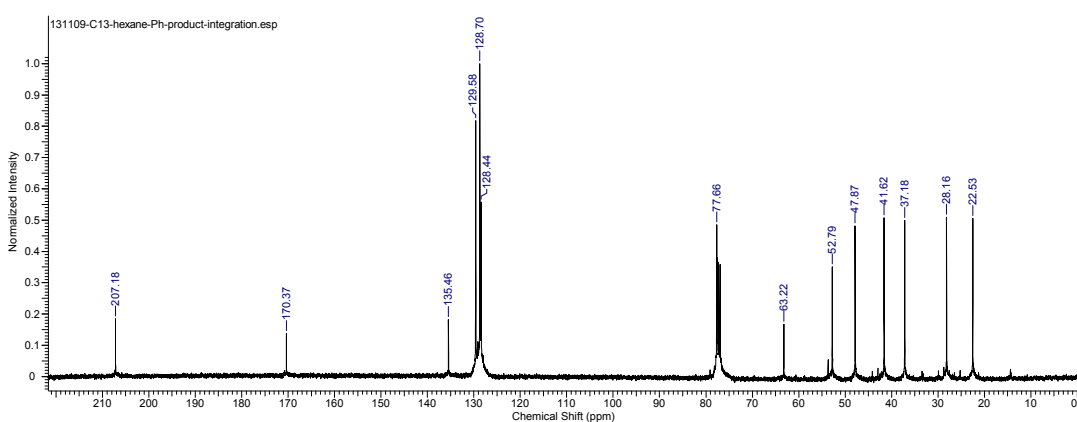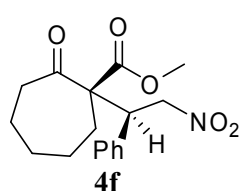

131120-heptane-Ph-chi-product-integration.esp

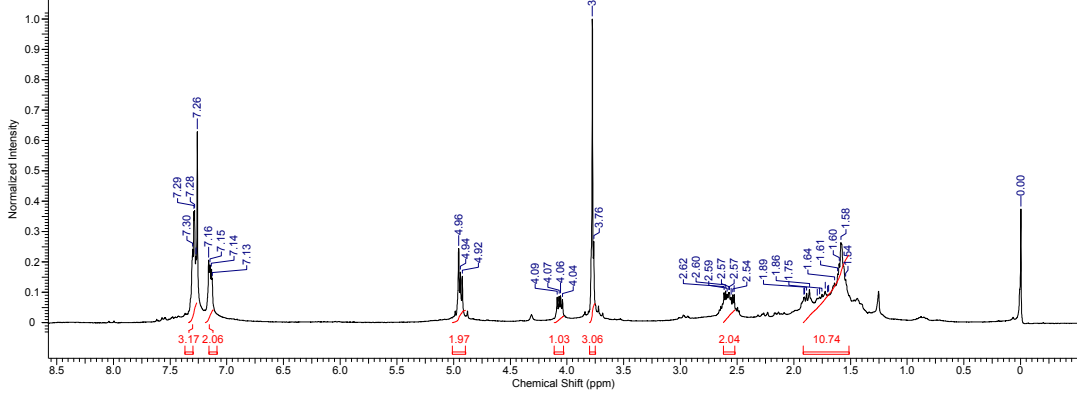

131122-C13-heptane-Ph-chi-product

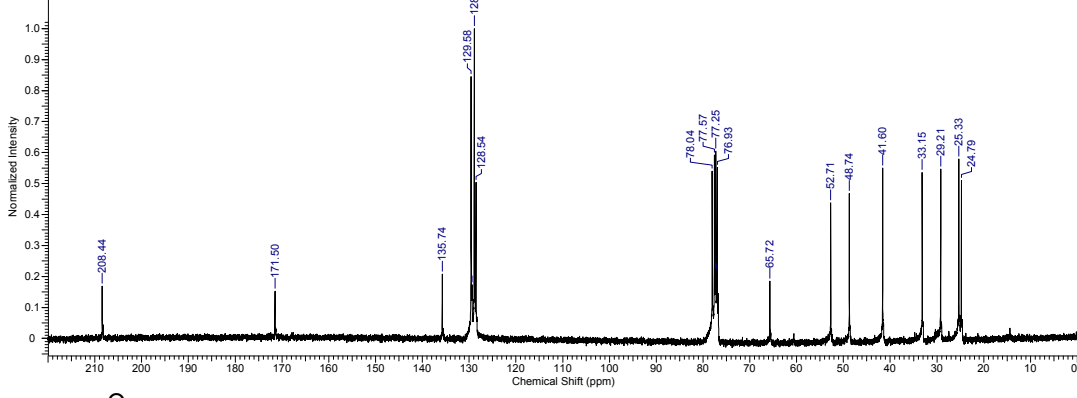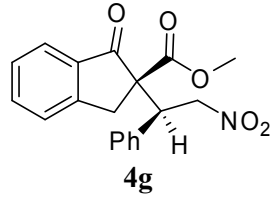

131113-indanone-chi-product-integration.esp

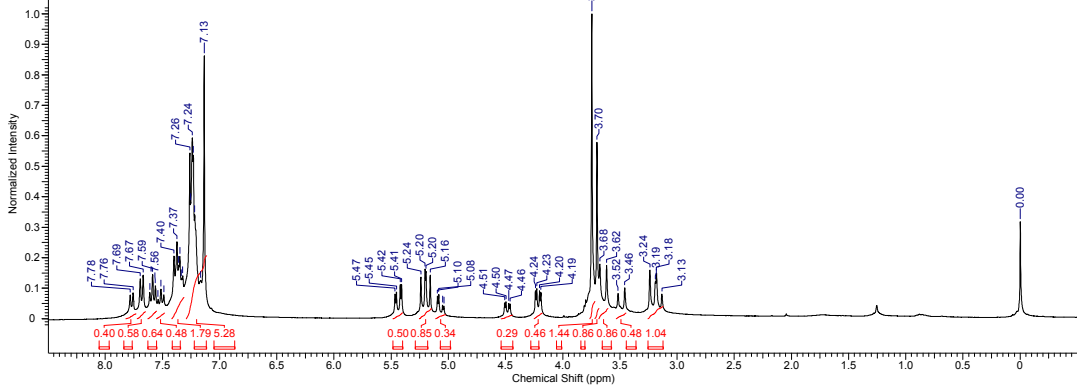

131123-C13-indanone-Ph-chiral-integration.esp

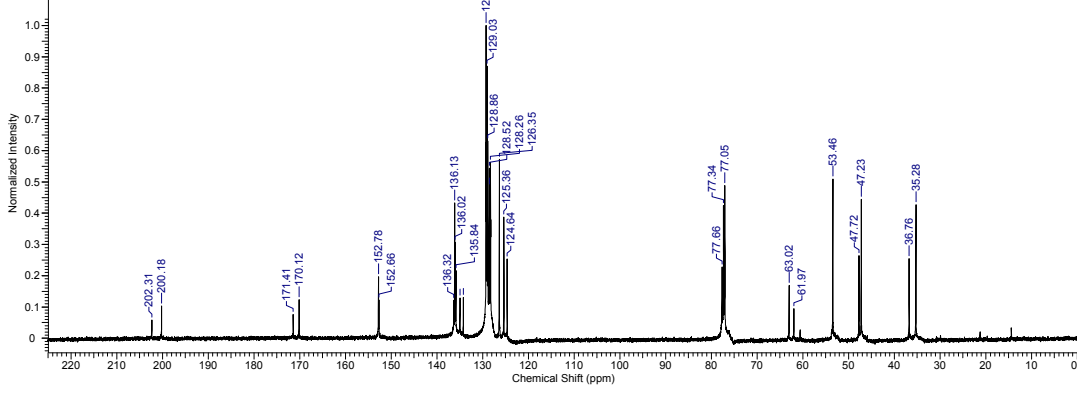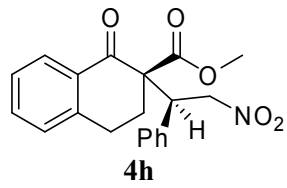

130523-alpha-tetralone-carbonate-chiral-product-integration.esp

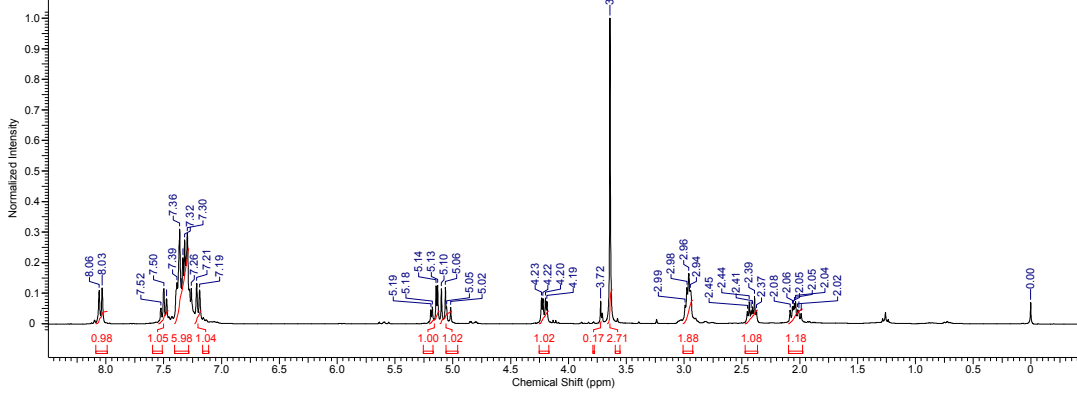

131113-C13-alpha-tetralone-chi-product-integration.esp

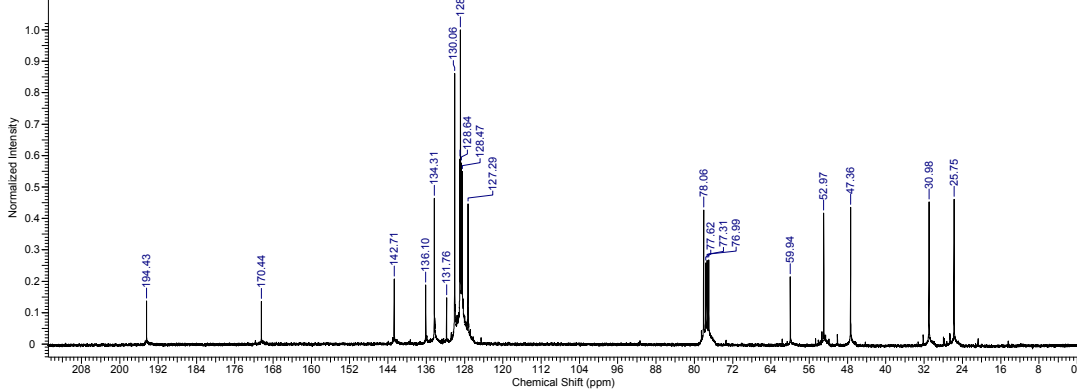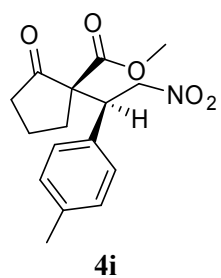



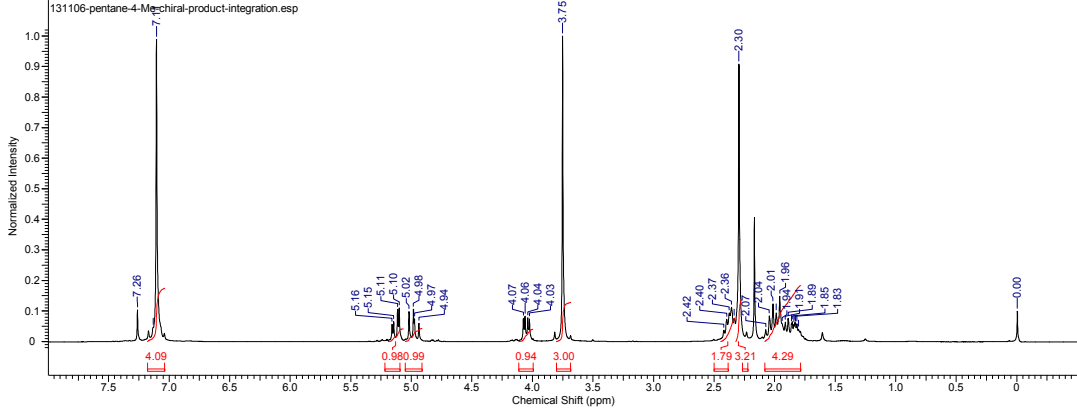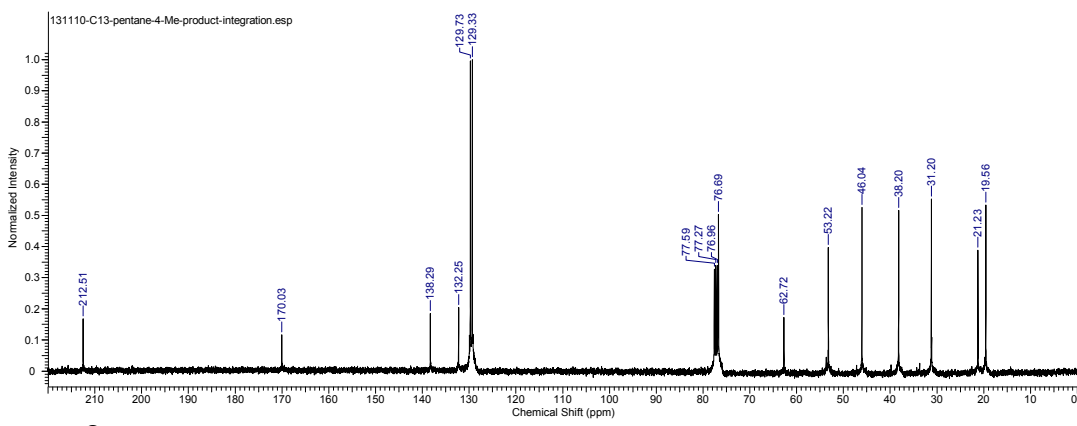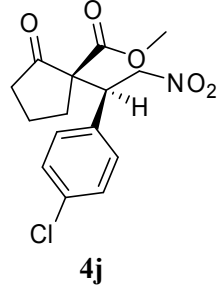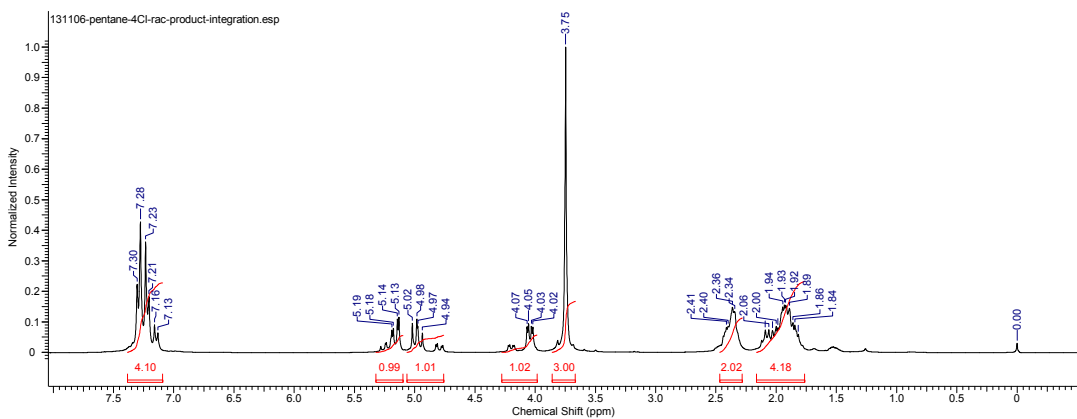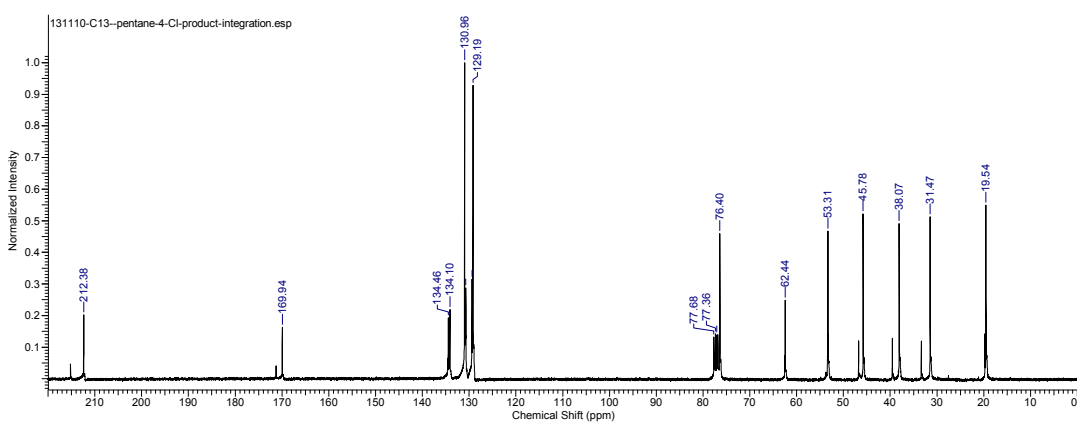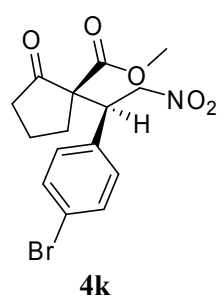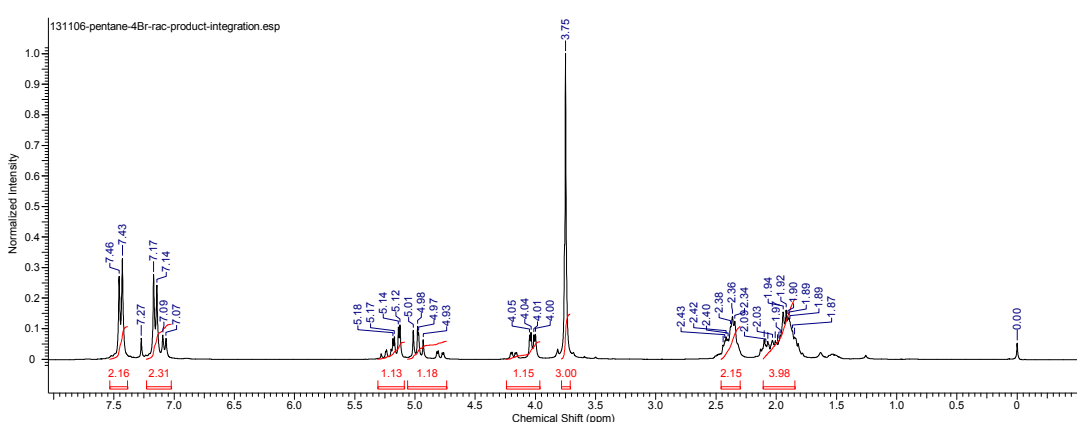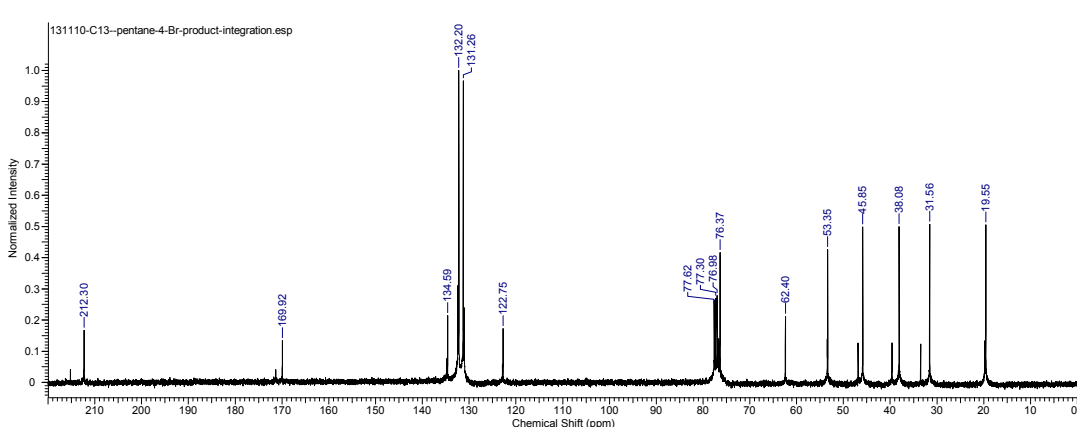

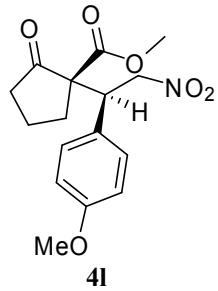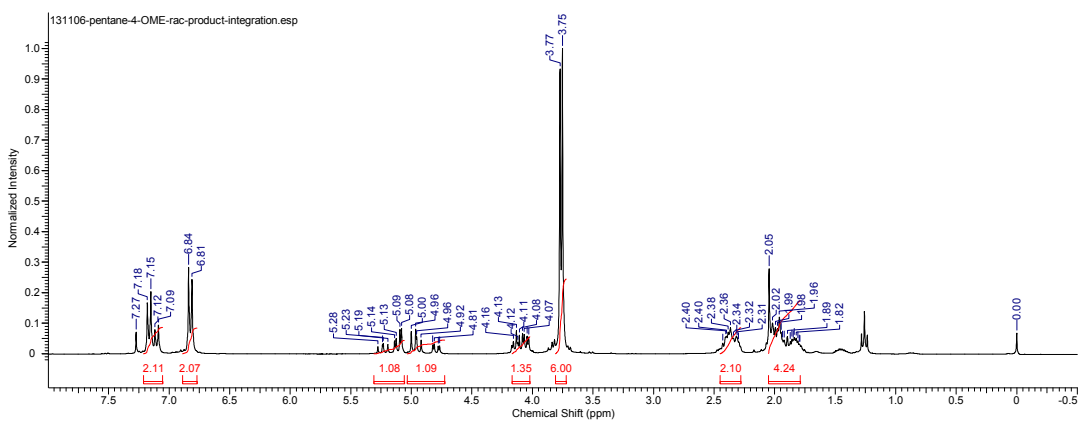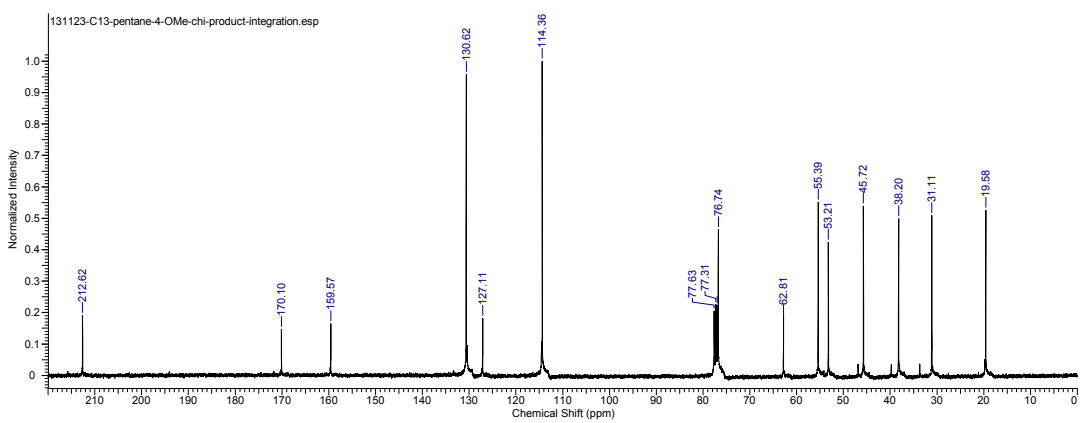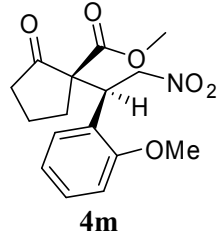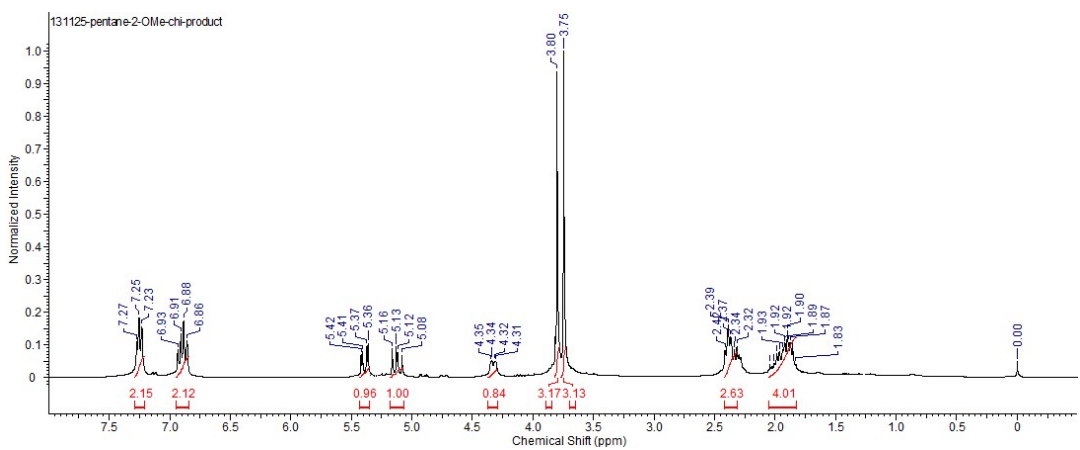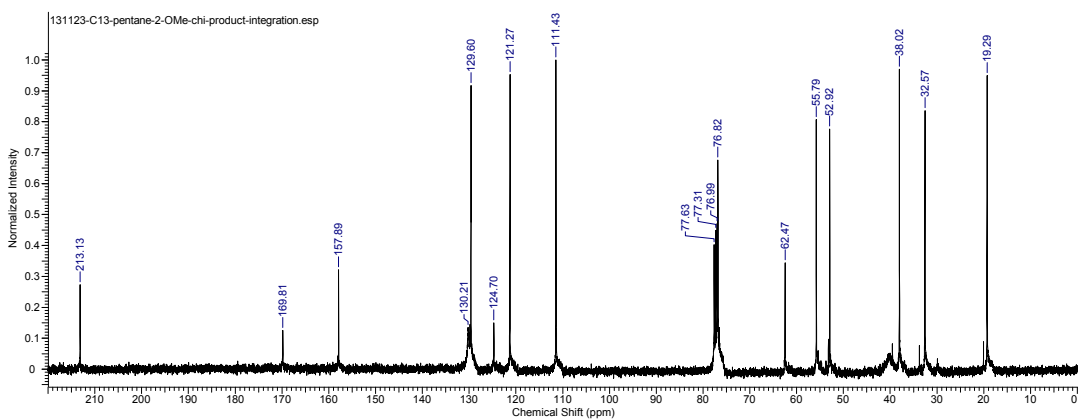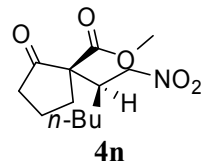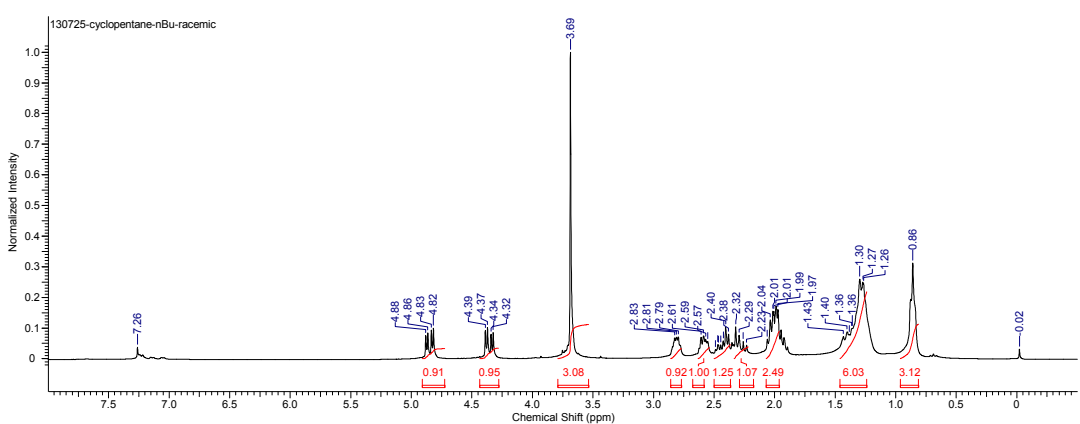

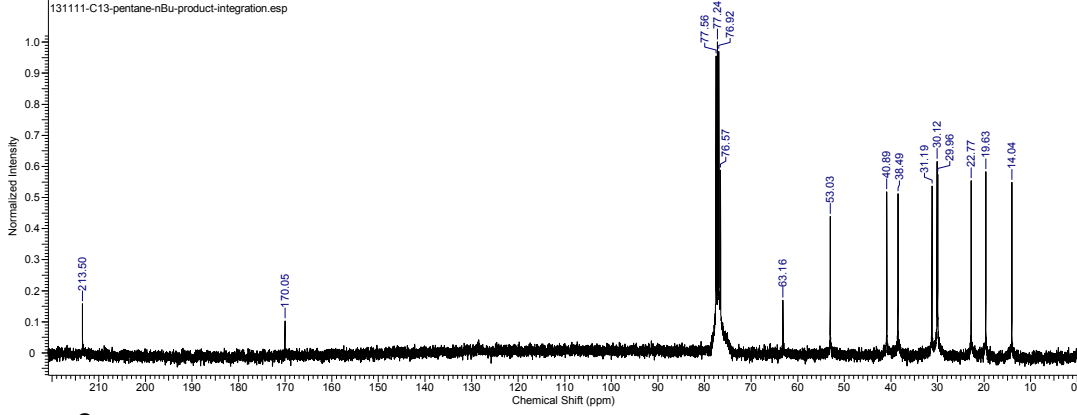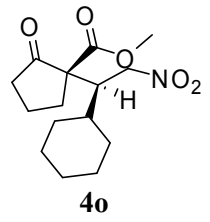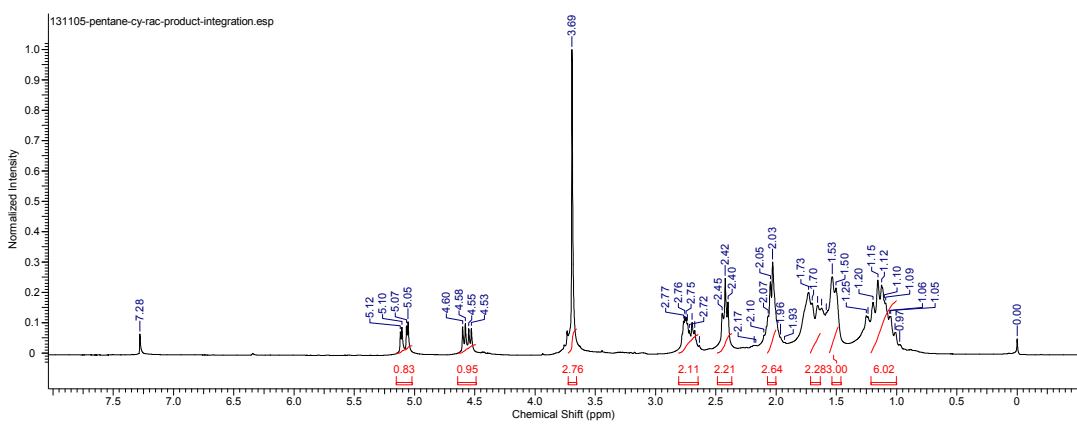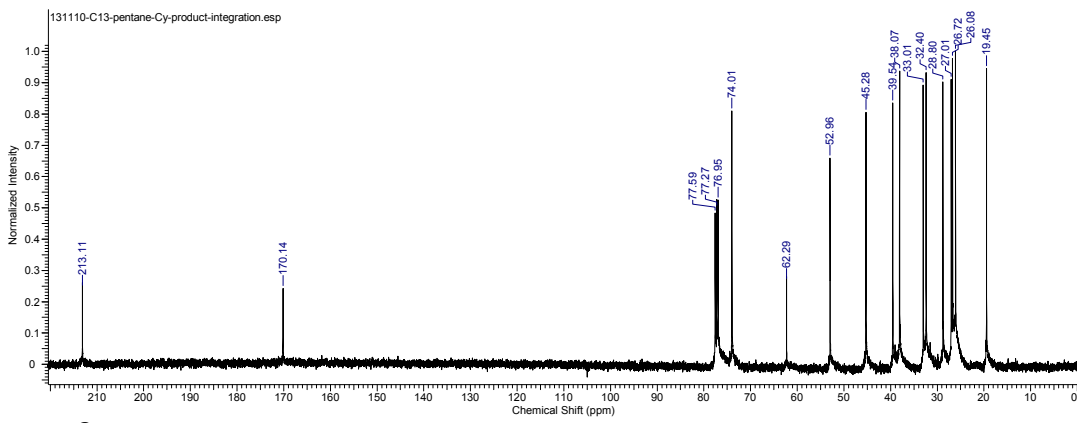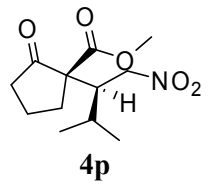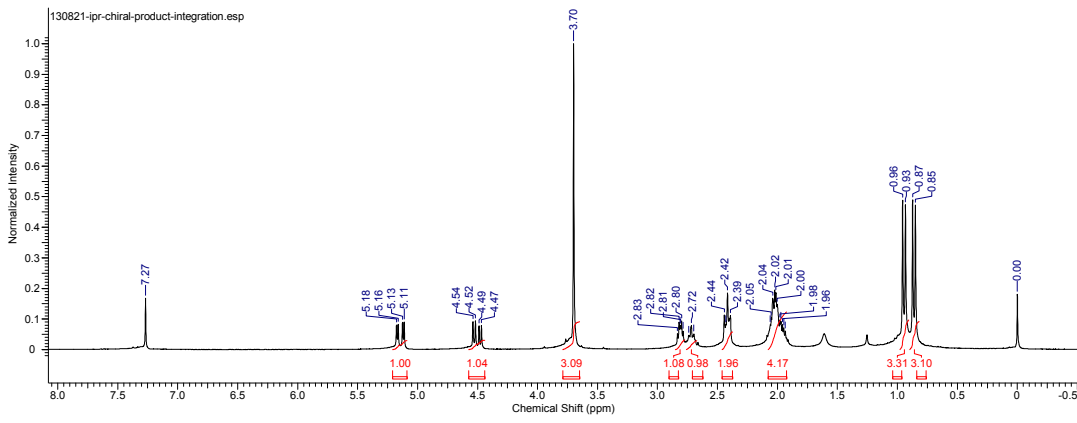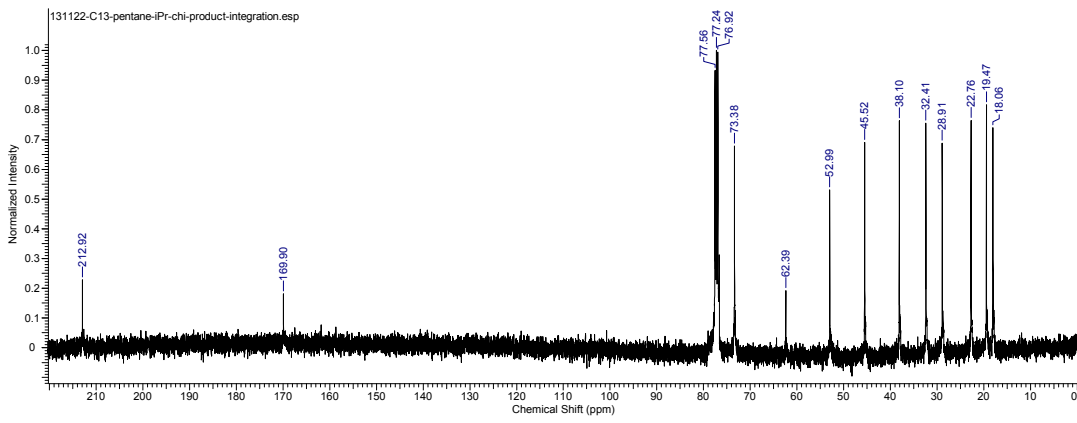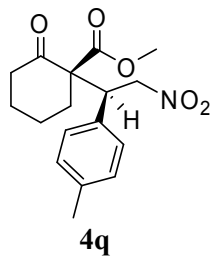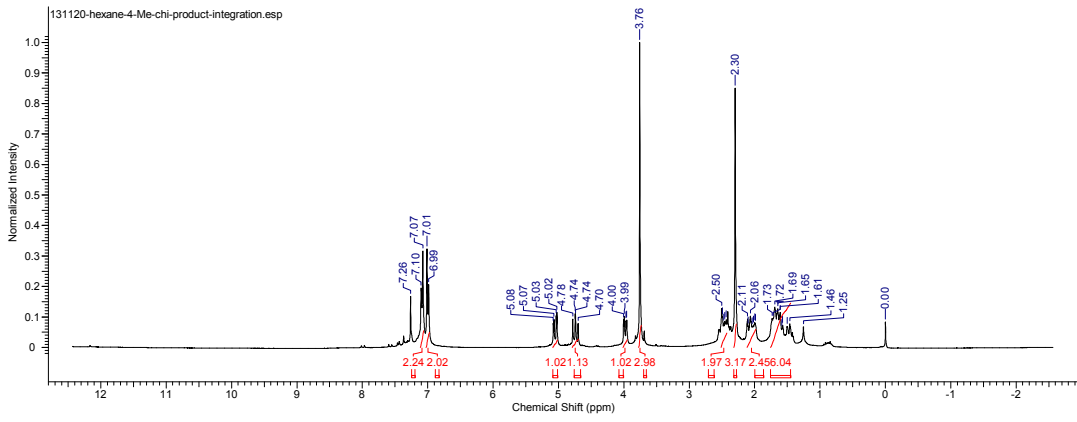

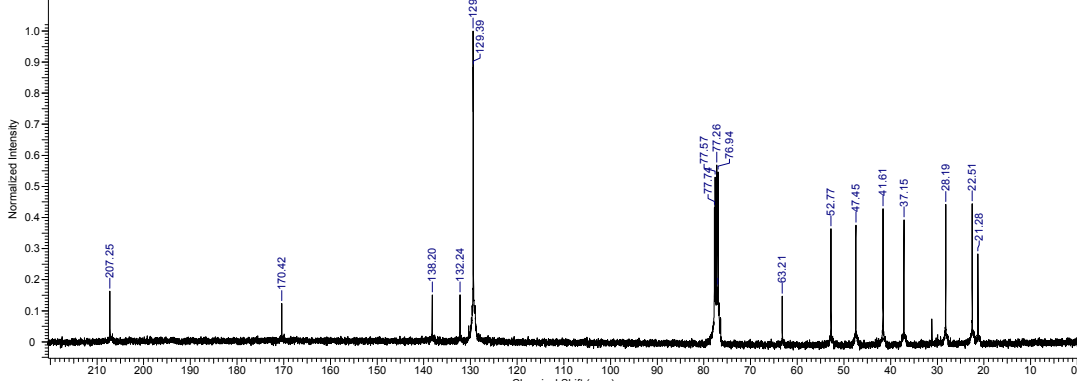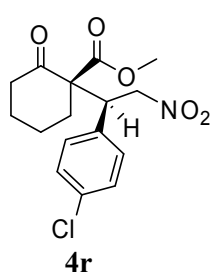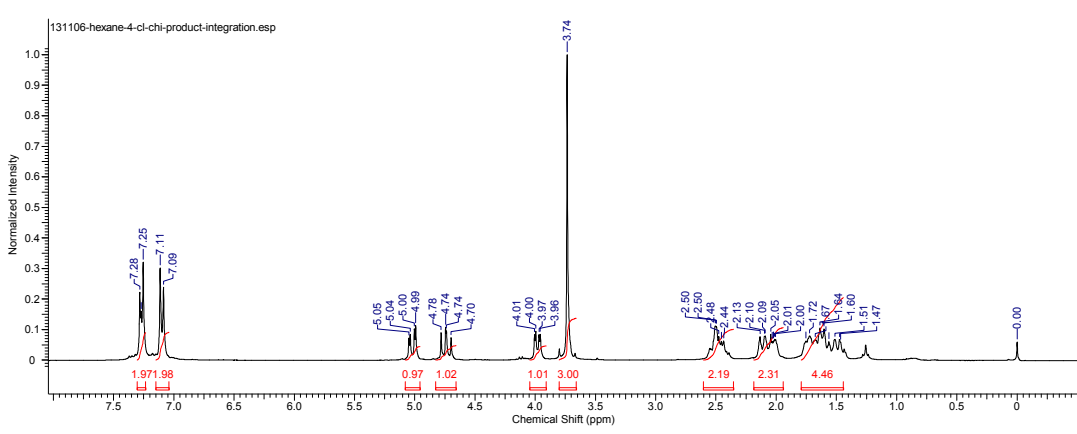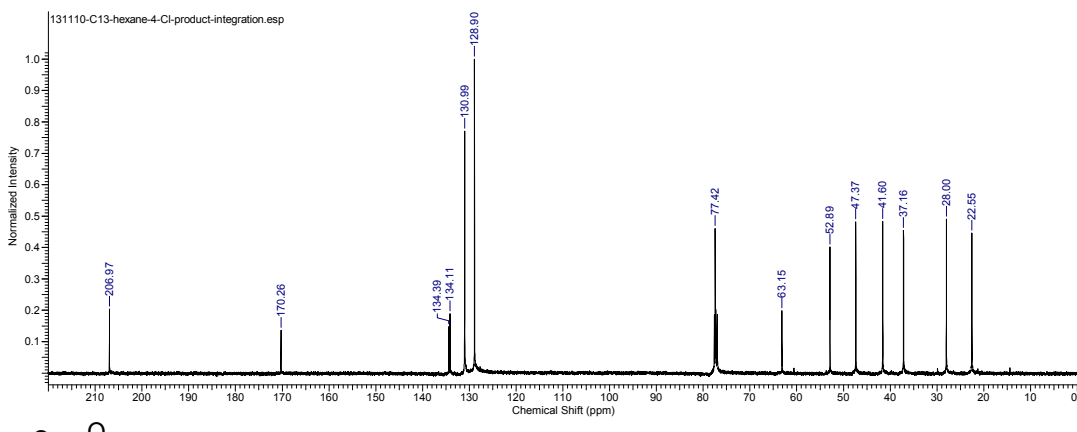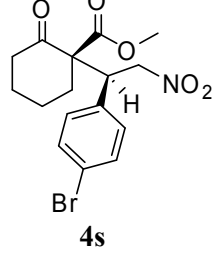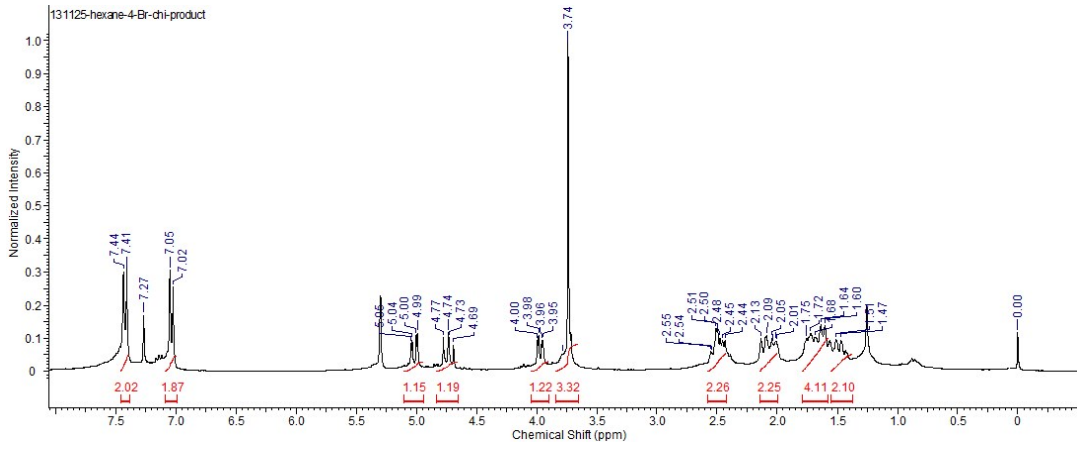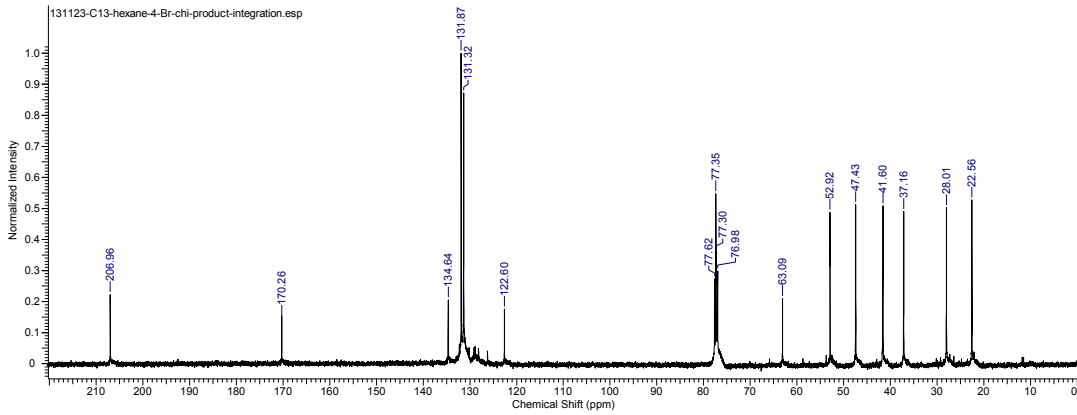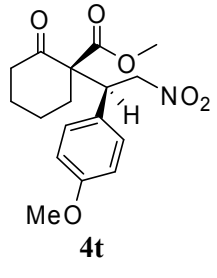

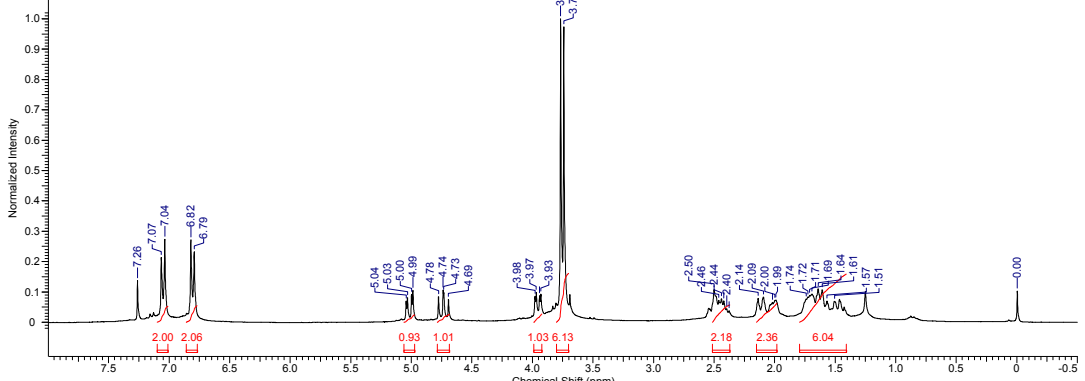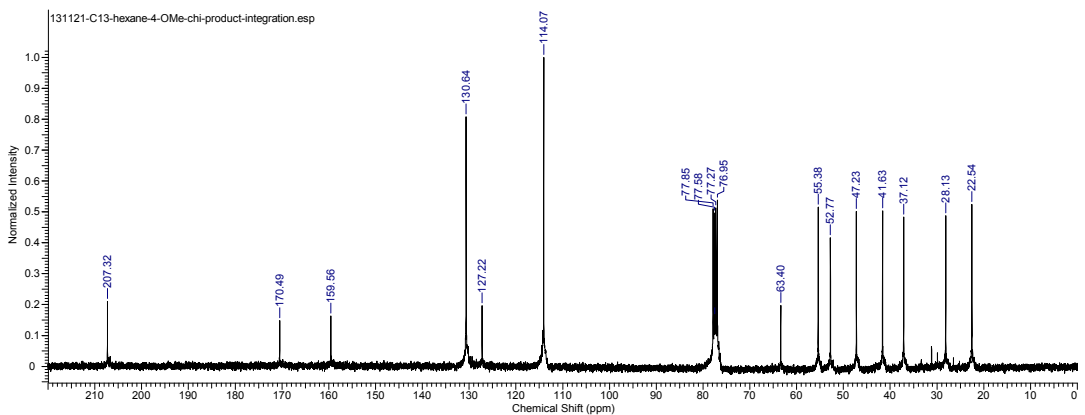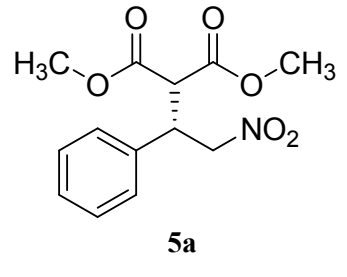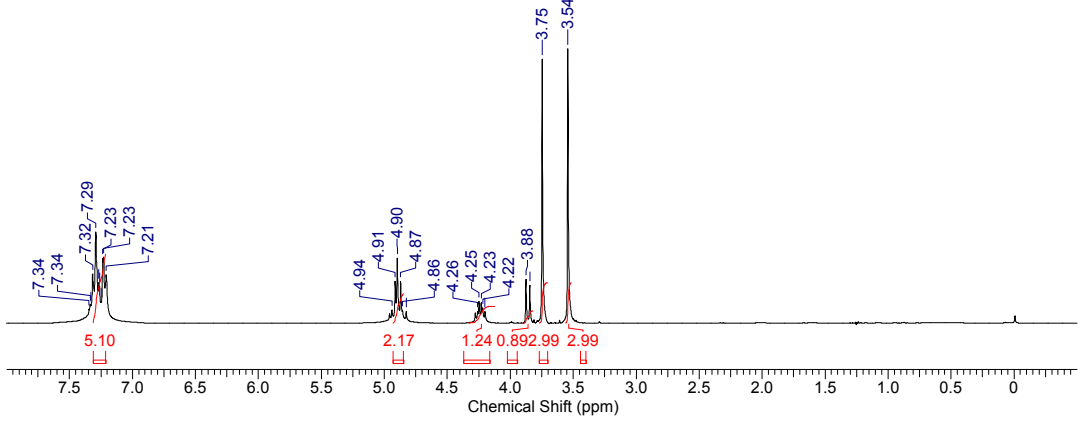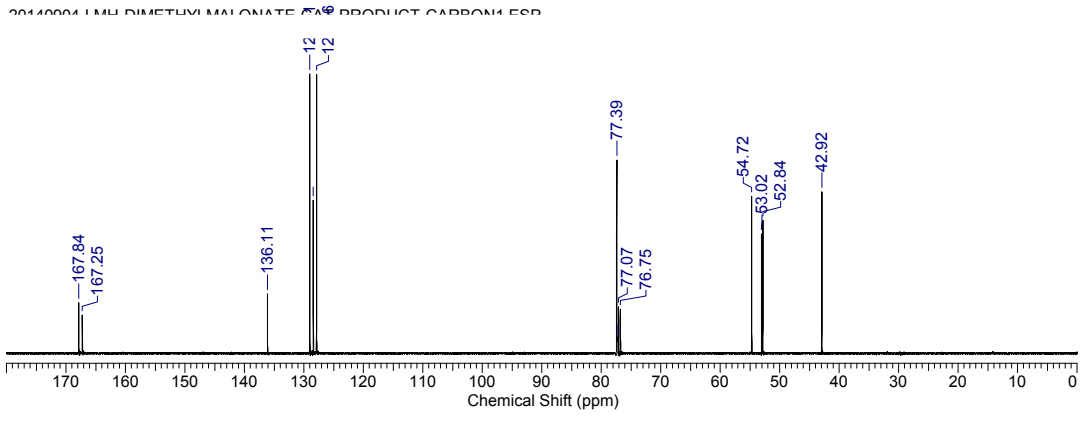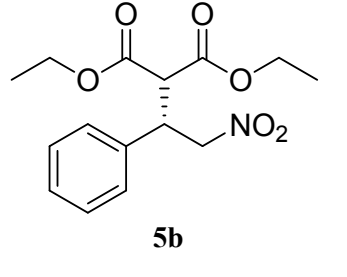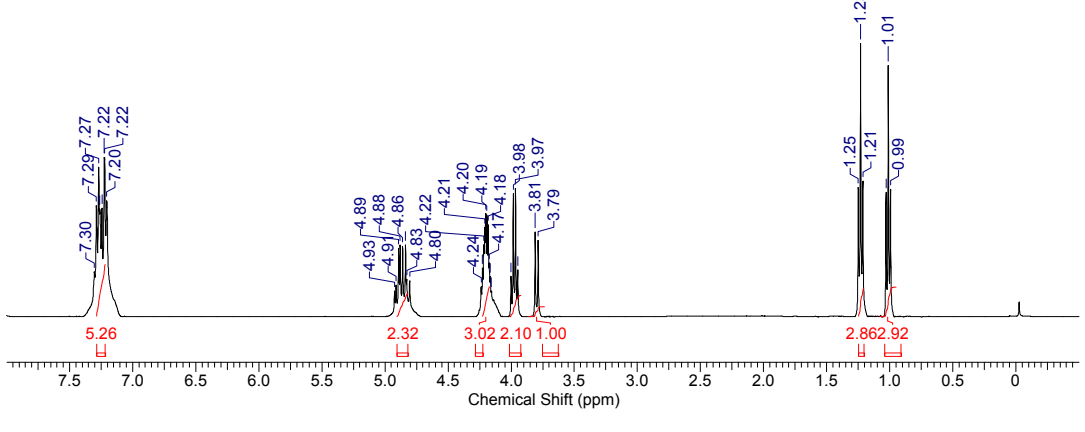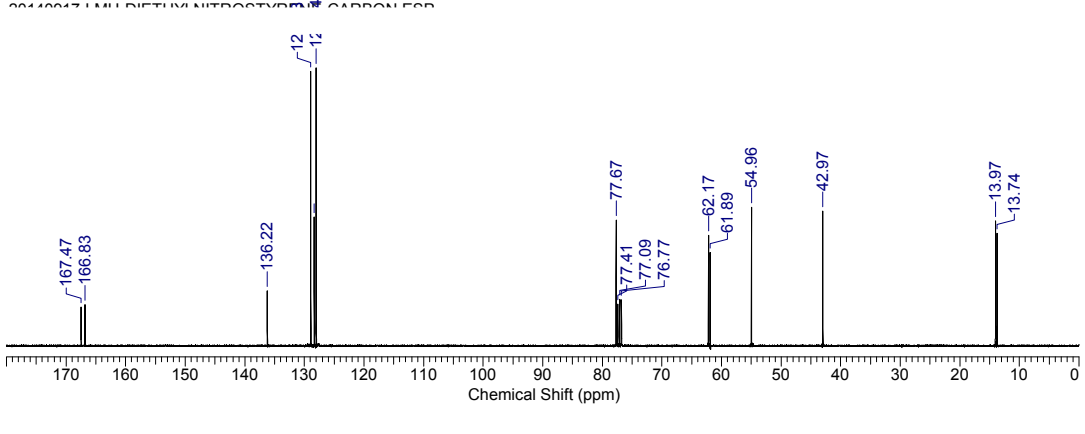

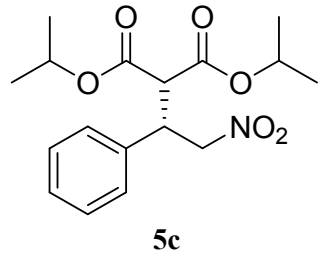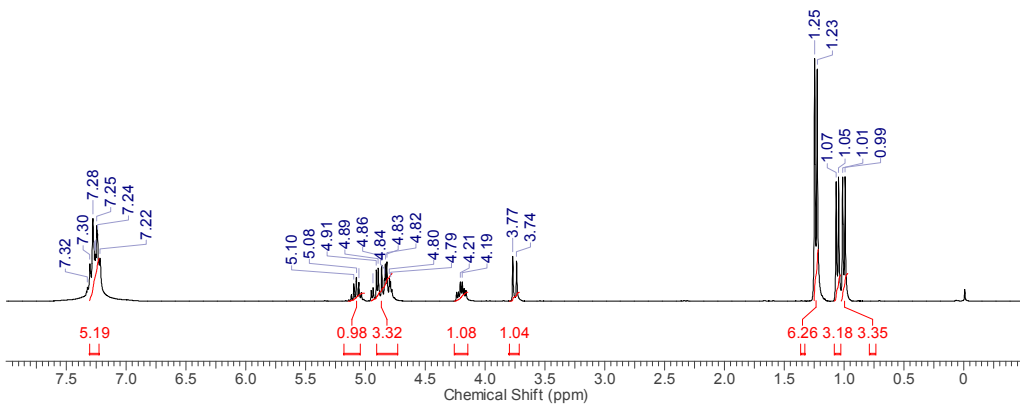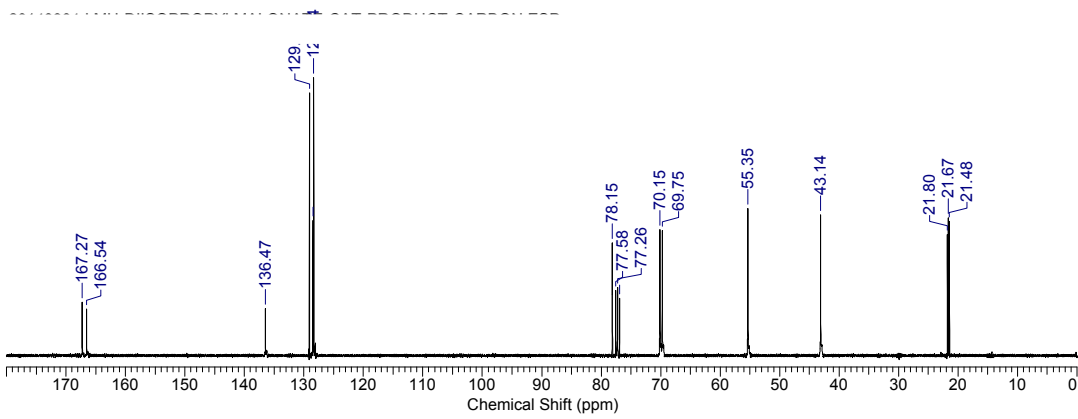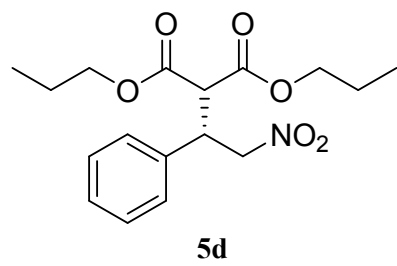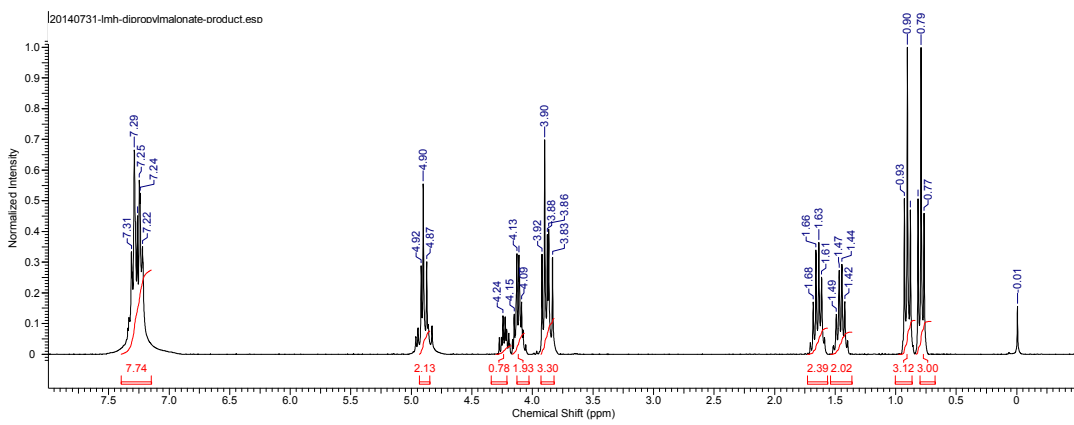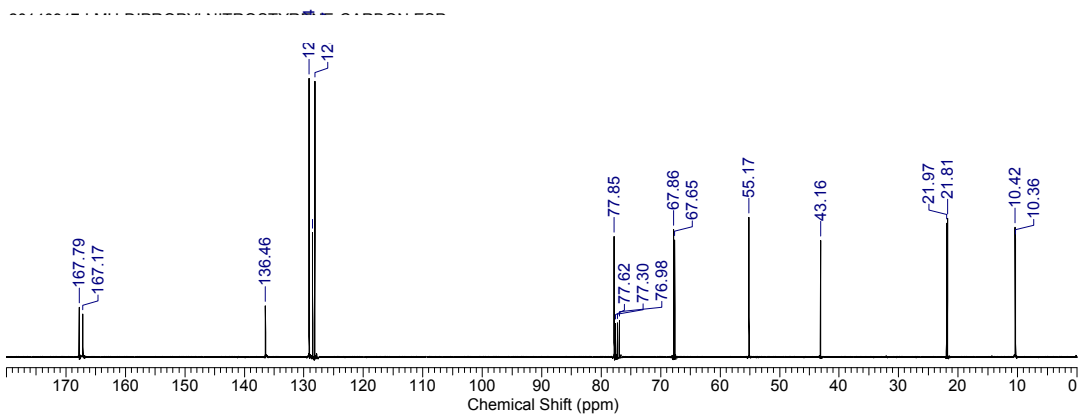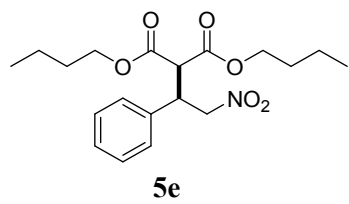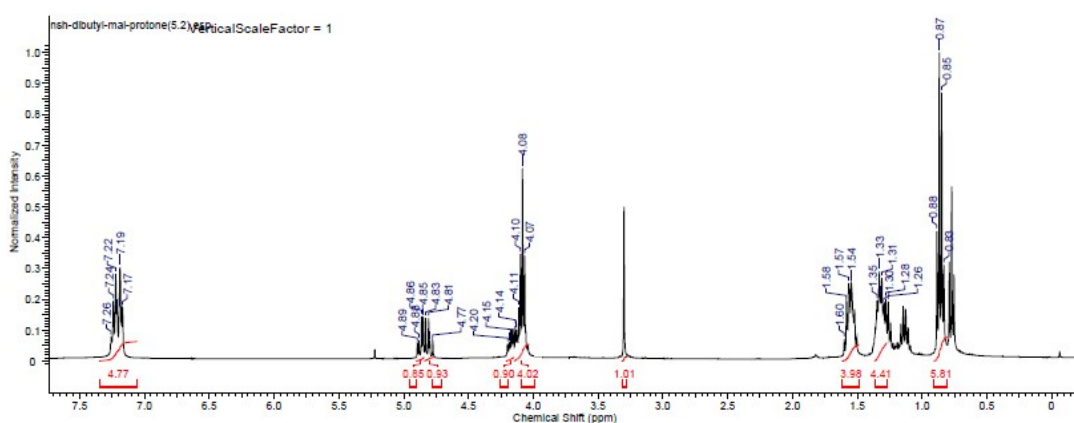

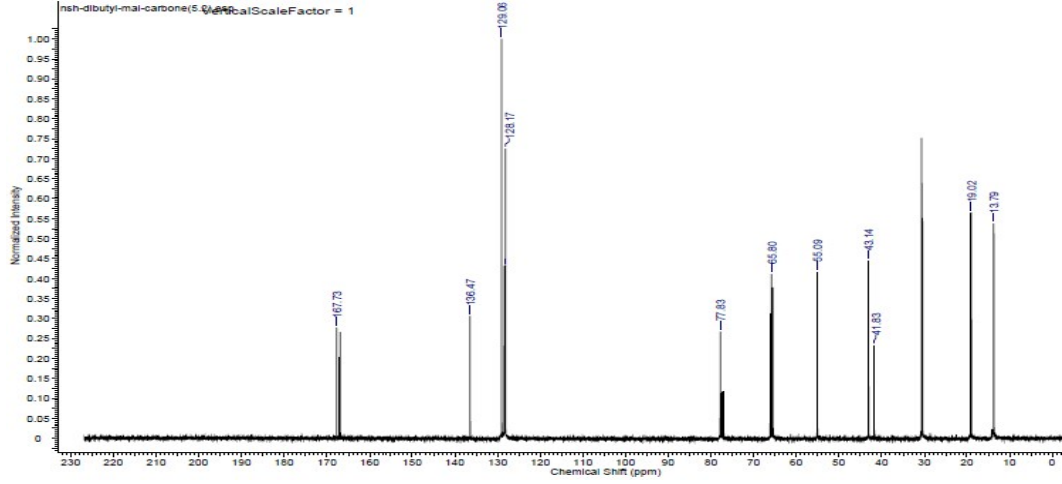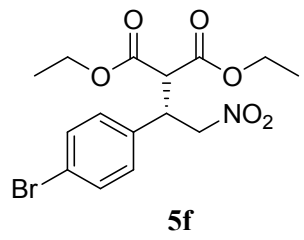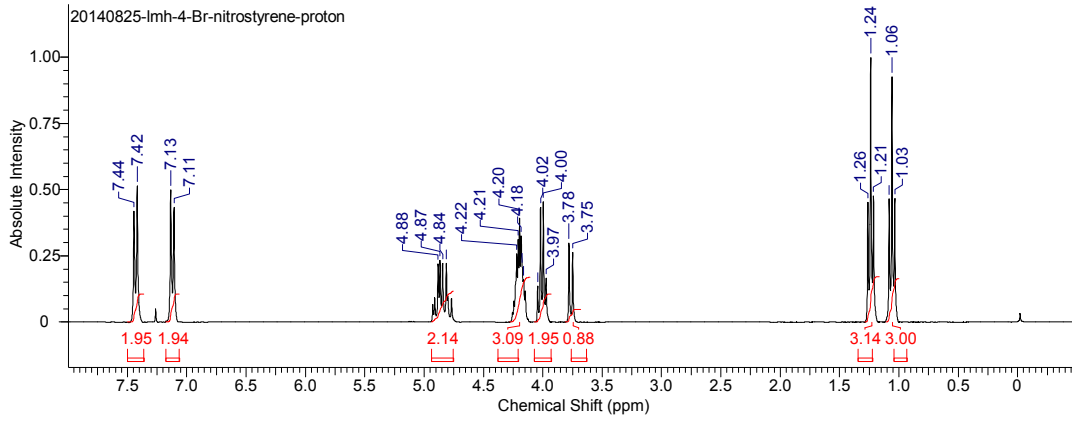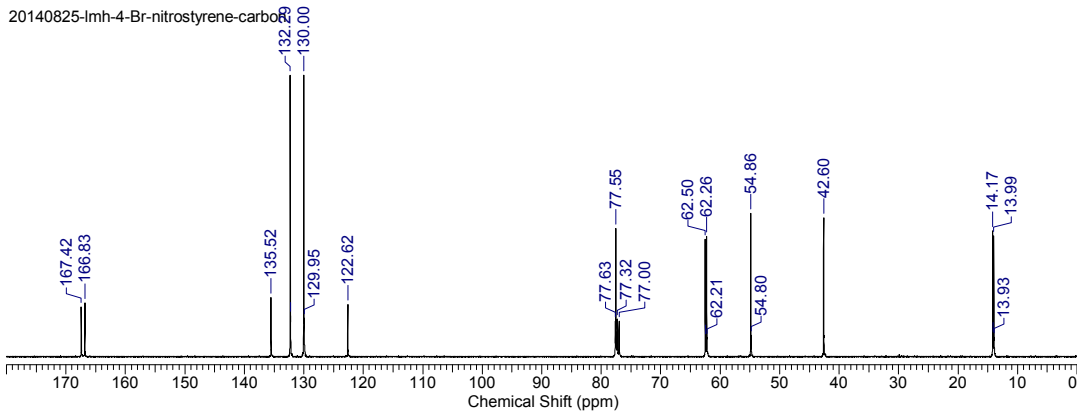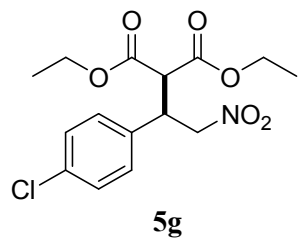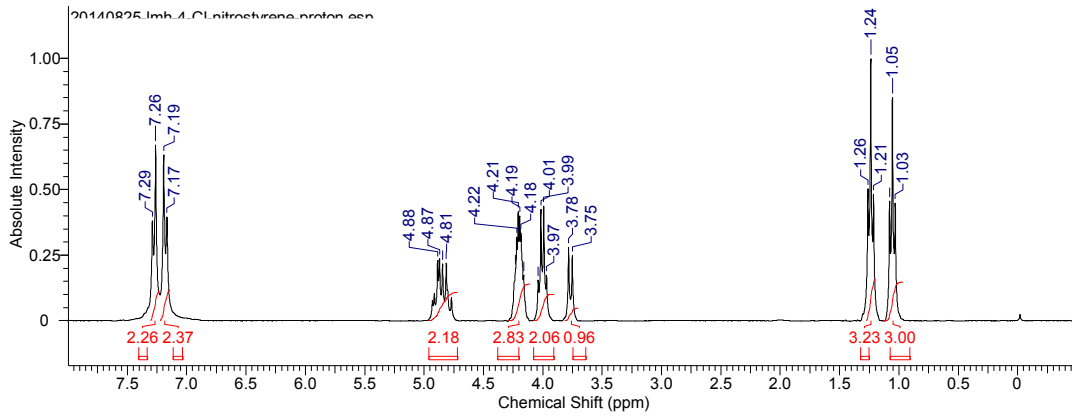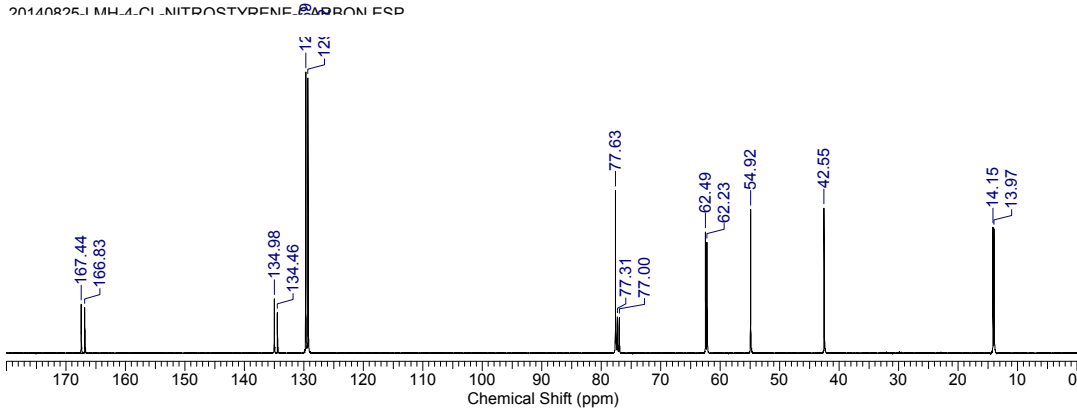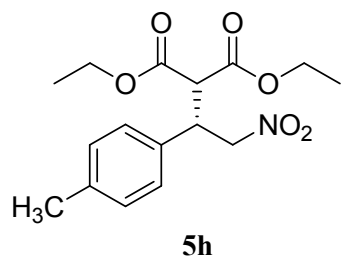

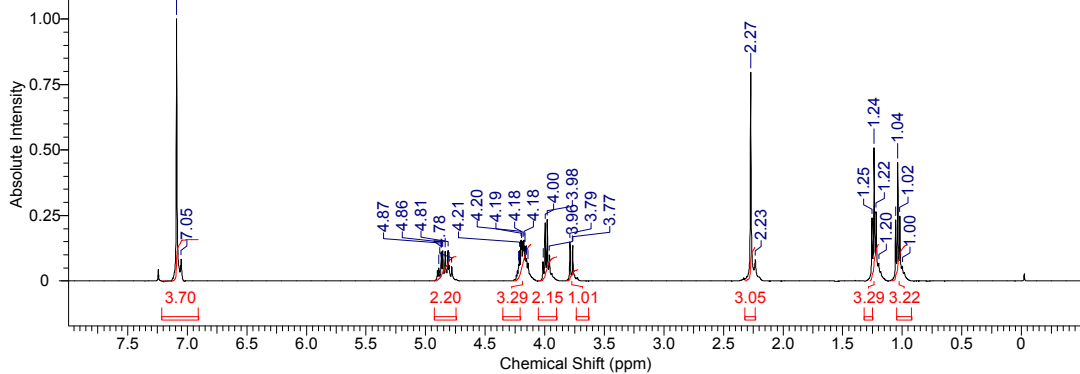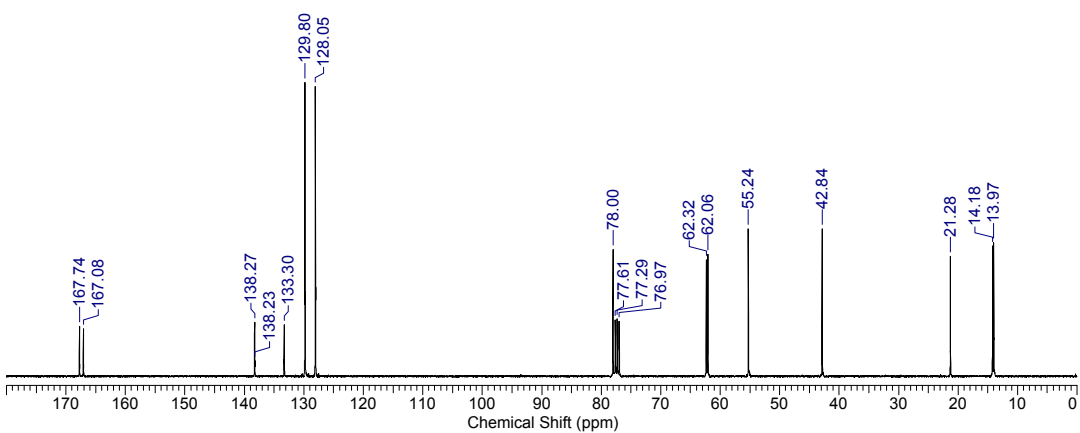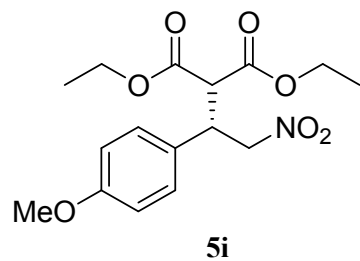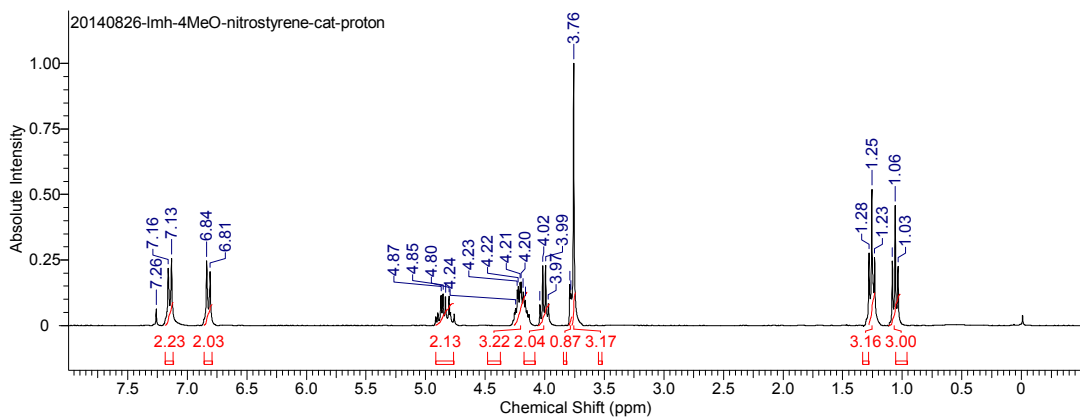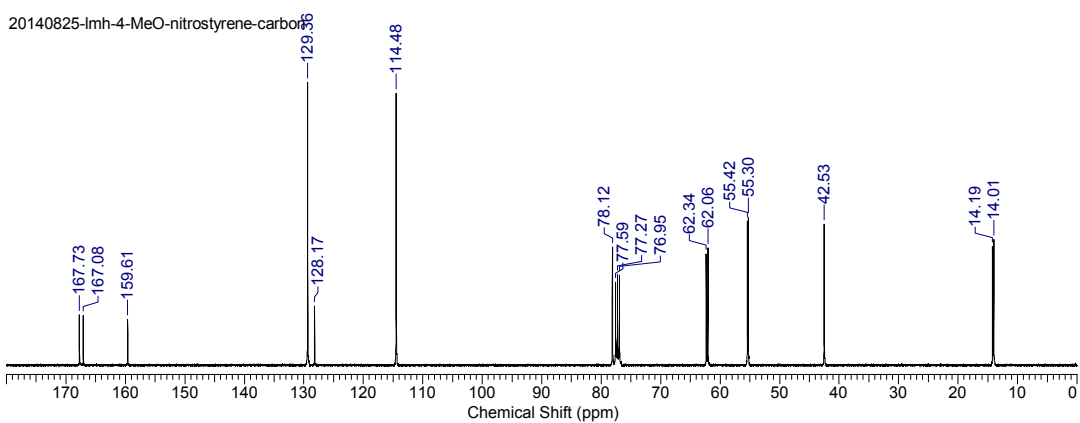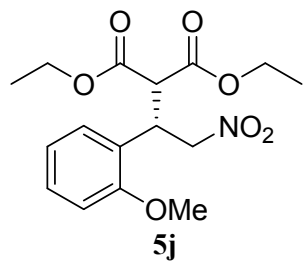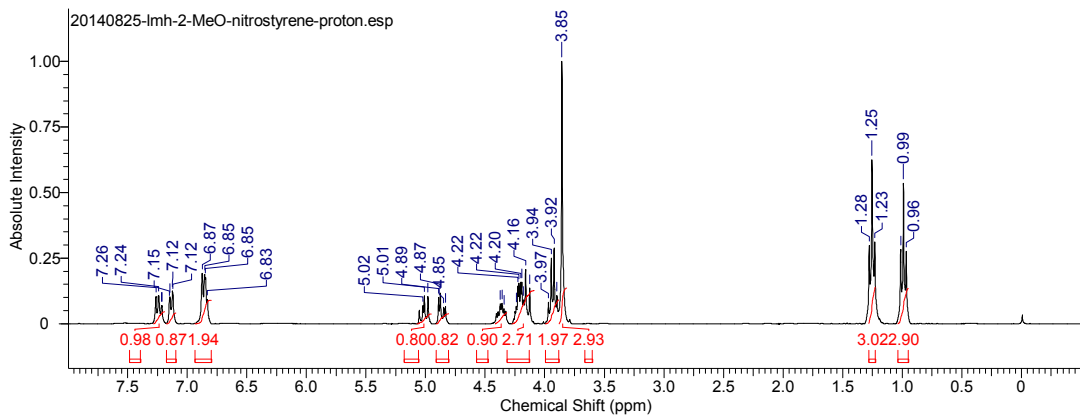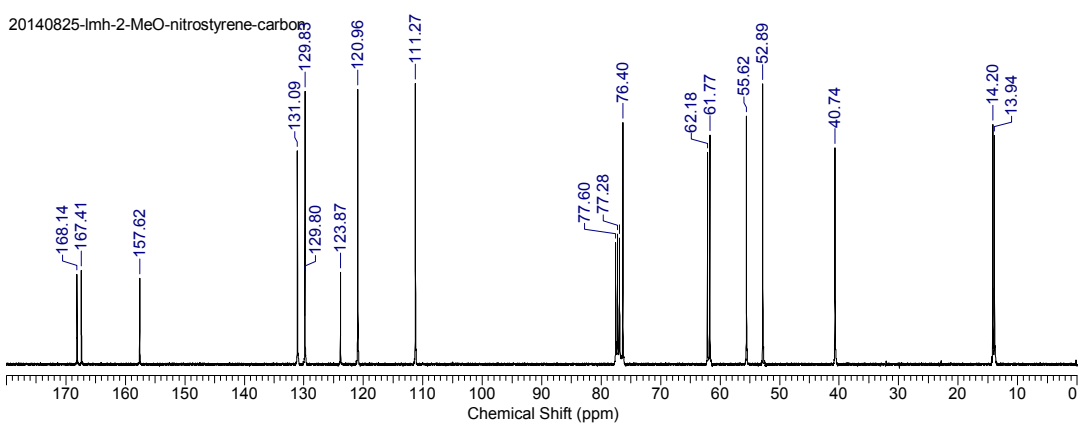



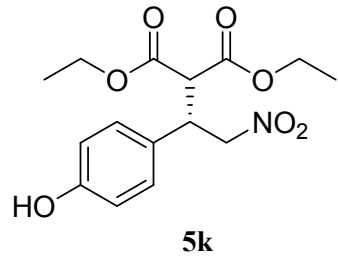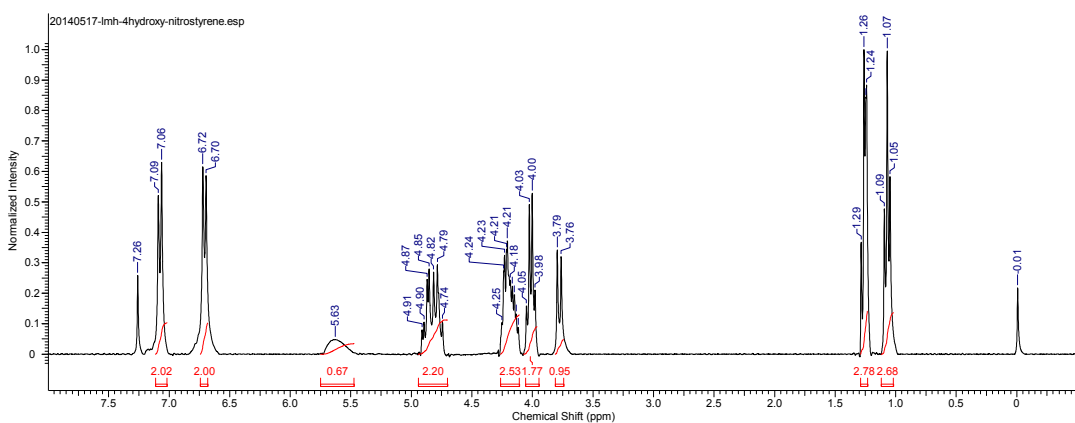

2010828-LMH-4-OH-NITROSTYRENE-CAT-CARBON.ESP

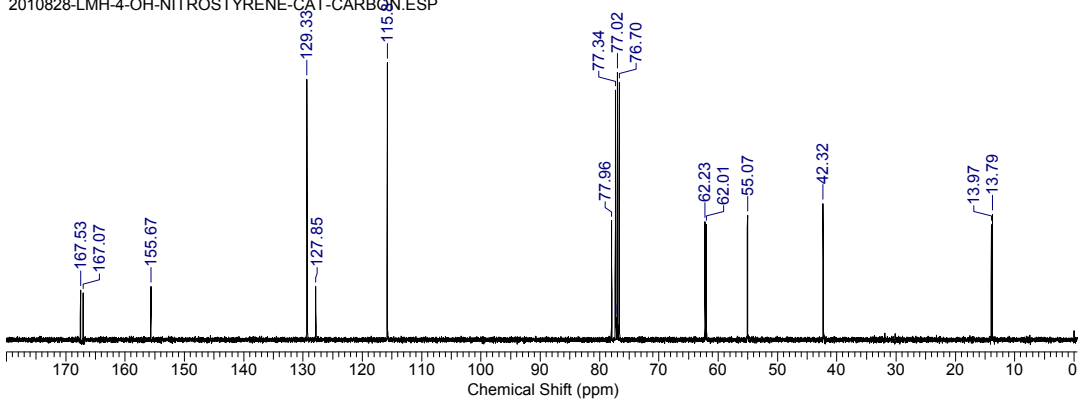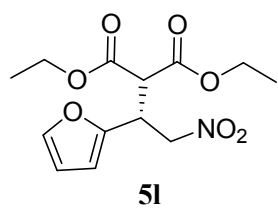

20140812-LMH-2-FURANNITROSTYRENE-PRODUCT.ESP

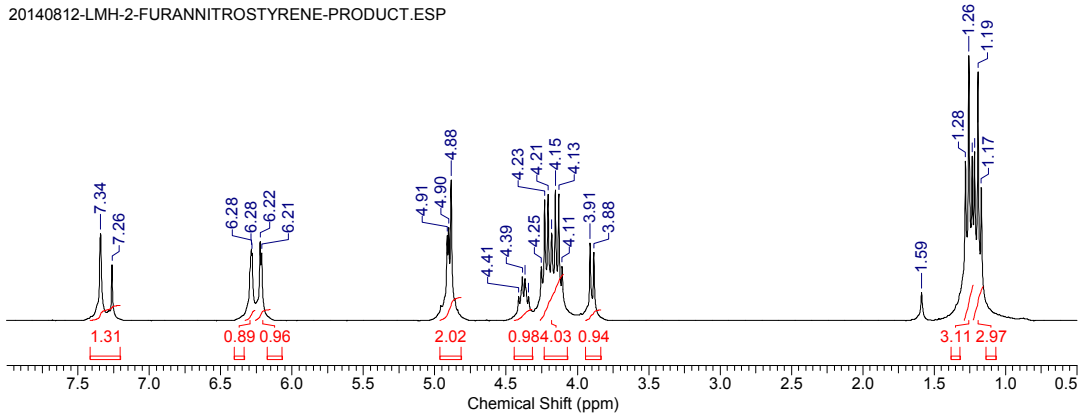

20140901-LMH-2-FURYL-NITROSTYRENE-CAT-CARBON.ESP

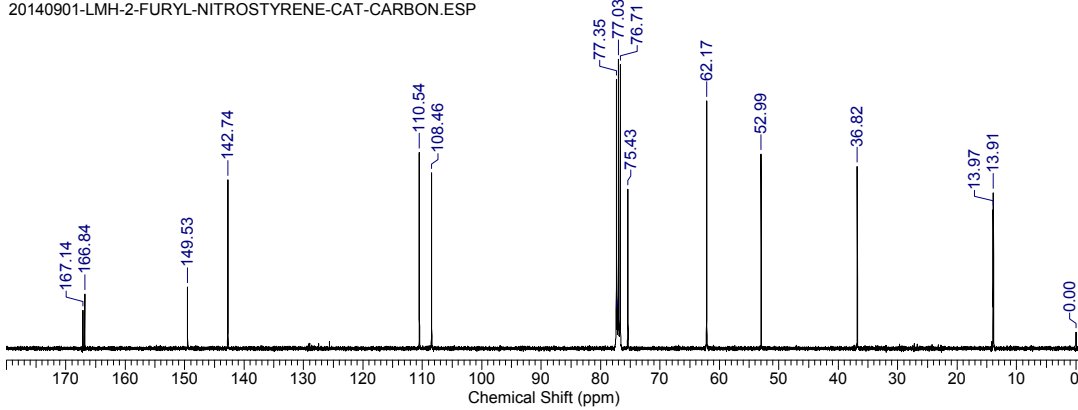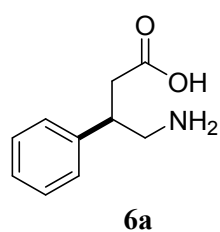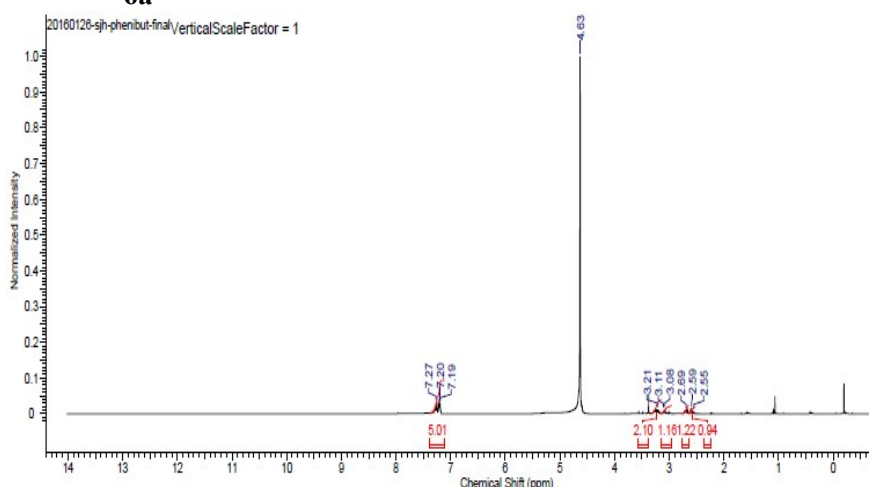

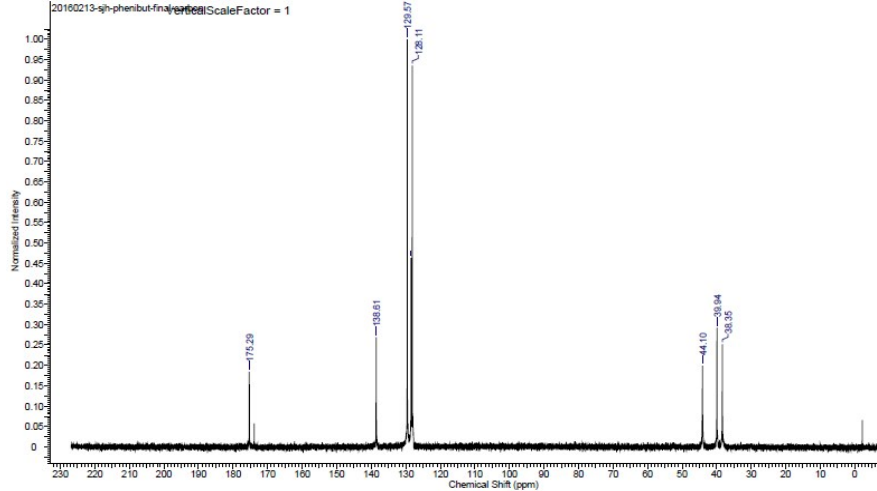

## MASS Spectra

### 1-[(1R,2R)-2-Amino-1,2-diphenylethyl]-3-phenylthiourea (1a)

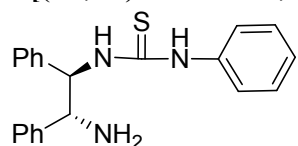

HRMS (FAB<sup>+</sup>) for C<sub>21</sub>H<sub>22</sub>N<sub>3</sub>S [M+H]<sup>+</sup> Calcd: 348.1534, Found: 348.1530.

[ Elemental Composition ]  
 Date : 07-May-108 21:22  
 Data : HFAB20080507-008  
 Sample: JS-Cat7  
 Note : in with MeOH  
 Inlet : Direct  
 RT : 2.23 min  
 Elements : C 21/0, H 22/0, N 3/0, S 1/0  
 Mass Tolerance : 20ppm, 10mmu if m/z < 500, 50mmu if m/z > 2500  
 Ion Mode : FAB+  
 Scan#: 24  
 Unsaturation (U.S.) : 0.0 - 100.0

| Observed m/z  | Int%        | U.S. | C  | H  | N | S |
|---------------|-------------|------|----|----|---|---|
| 348.1530      | 8.1         |      |    |    |   |   |
| Estimated m/z | Error [ppm] |      |    |    |   |   |
| 348.1534      | -1.3        | 13.5 | 21 | 22 | 3 | 1 |

### 1-(4-Nitrophenyl)-3-[(1R,2R)-2-(pentan-3-ylamino)-1,2-diphenylethyl]thiourea (1b)

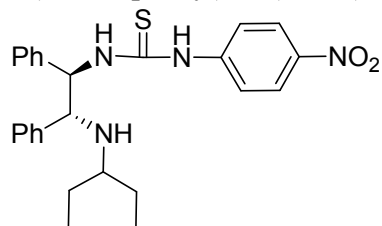

HRMS (FAB<sup>+</sup>) for C<sub>26</sub>H<sub>31</sub>N<sub>4</sub>O<sub>2</sub>S [M+H]<sup>+</sup> Calcd: 463.2168, Found: 463.2186.

[ Mass Spectrum ]  
 Date : 26-Jun-108 22:03  
 Data : HFAB20080702-004  
 Sample: KHJ-340  
 Note : in with MC  
 Inlet : Direct  
 Spectrum Type : Normal Ion [EF-Linear]  
 RT : 1.50 min  
 BP : m/z 463.2186  
 Output m/z range : 338.0000 to 588.0000  
 Ion Mode : FAB+  
 Scan#: 19  
 Int. : 165.37  
 Temp : 37.8 deg.C  
 Cut Level : 0.00 %

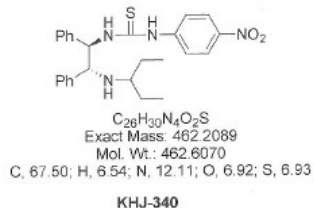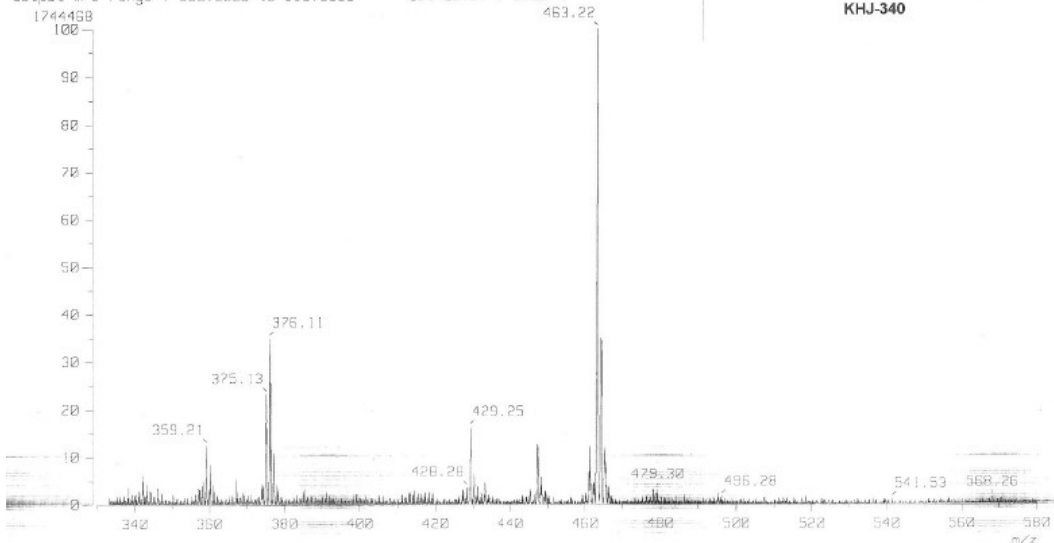

### 1-[(1R,2R)-2-Amino-1,2-diphenylethyl]-3-[3,5-Bis(trifluoromethyl)phenyl]thiourea (1b)

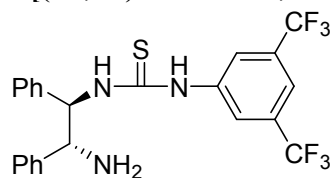

HRMS (FAB<sup>+</sup>) for C<sub>23</sub>H<sub>20</sub>F<sub>6</sub>N<sub>3</sub>S [M+H]<sup>+</sup> Calcd: 484.1282, Found: 484.1280

Instrument : MStation

Sample : 11

Note : m-NBA

Inlet : Direct Ion Mode : FAB+

RT : 0.16 min Scan# : (7,17)

Elements : C 100/0, H 100/0, F 10/0, N 5/2, S 2/0

Mass Tolerance : 1000ppm, 5mmu if m/z < 5, 10mmu if m/z > 10

Unsaturation (U.S.) : 5.0 - 20.0

| Observed m/z | Int%     | Err [ppm / mmu] | U.S.         | Composition           |
|--------------|----------|-----------------|--------------|-----------------------|
| 1            | 484.1280 | 12.32           | -19.5 / -9.4 | 17.0 C27 H18 F6 N2    |
| 2            |          |                 | +19.5 / +9.4 | 14.0 C24 H16 F8 N2    |
| 3            |          |                 | +6.5 / +3.2  | 17.5 C26 H16 F6 N3    |
| 4            |          |                 | -6.1 / -3.0  | 10.0 C20 H17 F9 N4    |
| 5            |          |                 | -19.0 / -9.2 | 13.5 C22 H17 F7 N5    |
| 6            |          |                 | +19.9 / +9.6 | 10.5 C19 H15 F9 N5    |
| 7            |          |                 | +12.5 / +6.1 | 10.0 C21 H20 F8 N2 S  |
| 8            |          |                 | -0.4 / -0.2  | 13.5 C23 H20 F6 N3 S  |
| 9            |          |                 | -13.4 / -6.5 | 17.0 C25 H20 F4 N4 S  |
| 10           |          |                 | -13.1 / -6.3 | 6.0 C17 H21 F9 N4 S   |
| 11           |          |                 | +12.6 / +6.1 | 17.5 C24 H18 F4 N5 S  |
| 12           |          |                 | +12.9 / +6.3 | 6.5 C16 H19 F9 N5 S   |
| 13           |          |                 | +5.2 / +2.5  | 17.0 C26 H23 F3 N2 S2 |
| 14           |          |                 | +5.5 / +2.7  | 6.0 C18 H24 F8 N2 S2  |
| 15           |          |                 | -7.4 / -3.6  | 9.5 C20 H24 F6 N3 S2  |
| 16           |          |                 | -20.4 / -9.9 | 13.0 C22 H24 F4 N4 S2 |
| 17           |          |                 | +18.6 / +9.0 | 10.0 C19 H22 F6 N4 S2 |
| 18           |          |                 | +5.6 / +2.7  | 13.5 C21 H22 F4 N5 S2 |

### 1-(4-Fluorophenyl)-3-[(1R,2R)-2-(pentan-3-ylamino)-1,2-diphenylethyl]thiourea (1c)

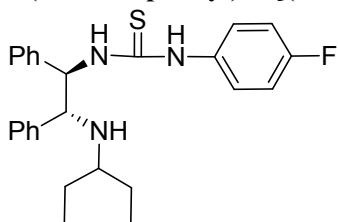

HRMS (FAB<sup>+</sup>) for C<sub>26</sub>H<sub>31</sub>FN<sub>3</sub>S[M+H]<sup>+</sup> Calcd: 436.2223, Found: 436.2201

[ Elemental Composition ]

Data : HFAB20080507-010

Date : 07-May-108 21:34

Sample: JS-Cat11

Note : in with MeOH

Inlet : Direct

Ion Mode : FAB+

RT : 2.03 min

Scan#: 22

Elements : C 26/0, H 31/0, N 3/0, F 1/0, S 1/0

Mass Tolerance : 20ppm, 50mmu if m/z > 2500

Unsaturation (U.S.) : 0.0 - 100.0

| Observed m/z | Int% | Estimated m/z | Error [ppm] | U.S. | C  | H  | N | F | S |
|--------------|------|---------------|-------------|------|----|----|---|---|---|
| 436.2201     | 30.9 | 436.2223      | -5.0        | 13.5 | 26 | 31 | 3 | 1 | 1 |

### 1-[3,5-Bis(trifluoromethyl)phenyl]-3-[(1R,2R)-2-(pentan-3-ylamino)-1,2-diphenylethyl]thiourea (1d)

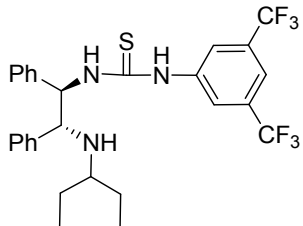

HRMS (FAB<sup>+</sup>) for C<sub>28</sub>H<sub>30</sub>F<sub>6</sub>N<sub>3</sub>S [M+H]<sup>+</sup> Calcd: 554.2065, Found: 554.2020

[ Mass Spectrum ]

Data : HFAB20080507-009

Date : 26-Jun-108 22:28

Sample: KHJ-343

Note : in with MeOH

Inlet : Direct

Ion Mode : FAB+

Spectrum Type : Normal Ion (EF-Linear)

RT : 1.75 min

Temp : 37.8 deg.C

Scan# : 22

BP : m/z 554.2078

Int. : 225.13

Output m/z range : 388.0000 to 660.0000

Cut Level : 0.00 %

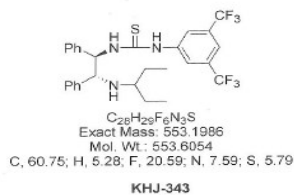

C<sub>28</sub>H<sub>30</sub>F<sub>6</sub>N<sub>3</sub>S  
Exact Mass: 553.1986  
Mol. Wt.: 553.6054  
C, 60.75; H, 5.28; F, 20.59; N, 7.59; S, 5.79

KHJ-343

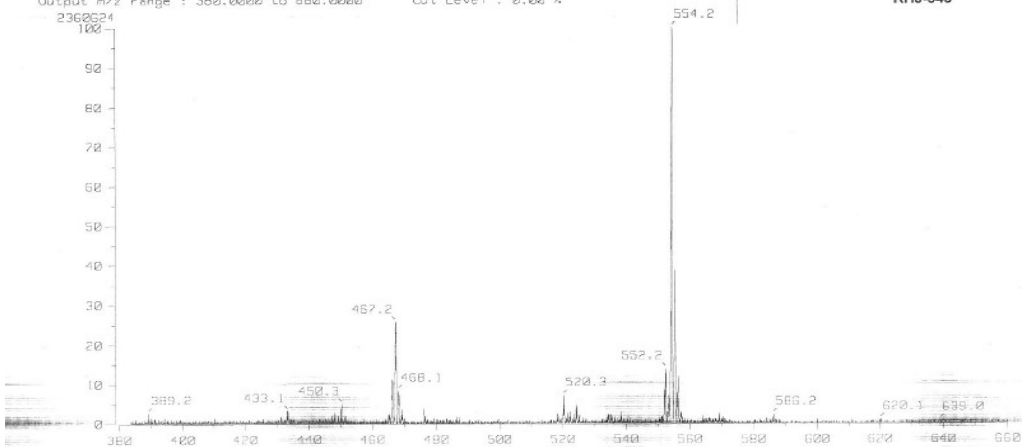

### 1-[(1R,2R)-2-(Pentan-3-ylamino)-1,2-diphenylethyl]-3-(p-tolyl)thiourea (1e)

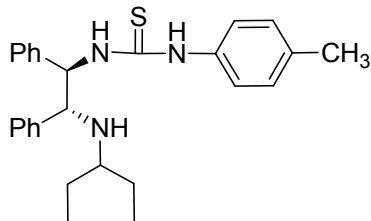

HRMS (FAB<sup>+</sup>) for C<sub>27</sub>H<sub>34</sub>N<sub>3</sub>S [M+H]<sup>+</sup> Calcd: 432.2473, Found: 432.2460

[ Elemental Composition ]

Data : HFAB20080507-009

Date : 07-May-108 21:27

Sample: JS-Cat10

Note : in with MeOH

Inlet : Direct

Ion Mode : FAB+

RT : 1.36 min

Scan#: 15

Elements : C 27/0, H 34/0, N 3/0, S 1/0

Mass Tolerance : 20ppm, 10mmu if m/z < 500, 50mmu if m/z > 2500

Unsaturation (U.S.) : 0.0 - 100.0

| Observed m/z | Int% | Estimated m/z | Error [ppm] | U.S. | C  | H  | N | S |
|--------------|------|---------------|-------------|------|----|----|---|---|
| 432.2460     | 64.5 | 432.2473      | -3.1        | 13.5 | 27 | 34 | 3 | 1 |

Page: 1

### 1-(4-Cyanophenyl)-3-[(1R,2R)-2-(pentan-3-ylamino)-1,2-diphenylethyl]thiourea (1f)

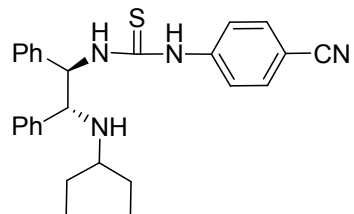

HRMS (FAB<sup>+</sup>) for C<sub>27</sub>H<sub>31</sub>N<sub>4</sub>S [M+H]<sup>+</sup> Calcd: 443.2269, Found: 443.2279.

Sample: KHJ-341

Note : in with MC

Inlet : Direct

Ion Mode : FAB+

Spectrum Type : Normal Ion [EF-Linear]

RT : 1.75 min Scan# : 22

Temp : 37.7 deg.C

BP : m/z 443.2279 Int. : 282.10

Output m/z range : 330.0000 to 580.0000

Cut Level : 0.00 %

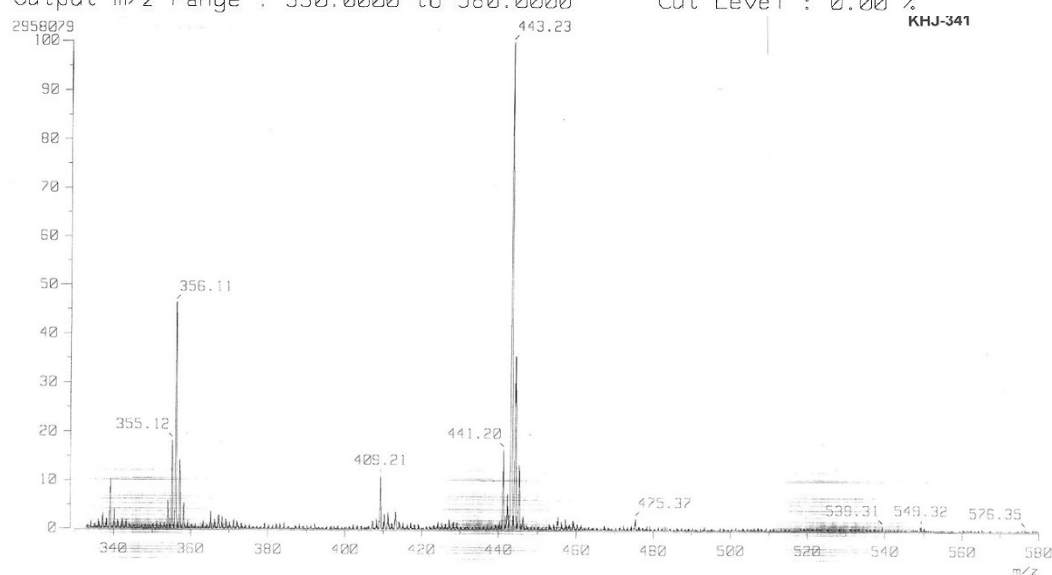

**1-[(1R,2R)-2-(Pentan-3-ylamino)-1,2-diphenylethyl]-3-[4-(trifluoromethyl)phenyl]thiourea (1g)**

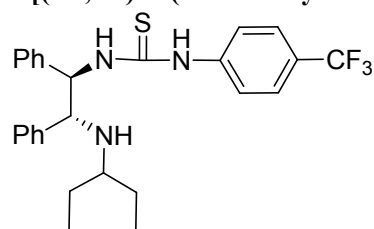

HRMS(FAB<sup>+</sup>) for C<sub>27</sub>H<sub>31</sub>F<sub>3</sub>N<sub>3</sub>S[M+H]<sup>+</sup> Calcd: 486.2191, Found: 486.2163.

[ Elemental Composition ]

Data : HFAB2008000818-009

Date : 04-Aug-108 14:13

Sample: KHJ-375

Note : in with MC

Inlet : Direct

Ion Mode : FAB+

RT : 0.92 min

Scan#: 12

Elements : C 27/0, H 31/0, N 3/0, F 3/0, S 1/0

Mass Tolerance : 20ppm, 10mmu if m/z < 500, 50mmu if m/z > 2500

Unsaturation (U.S.) : 0.0 - 100.0

| Observed m/z  | Int%        | U.S. | C  | H  | N | F | S |
|---------------|-------------|------|----|----|---|---|---|
| 486.2163      | 100.0       |      |    |    |   |   |   |
| Estimated m/z | Error [ppm] | U.S. | C  | H  | N | F | S |
| 486.2191      | -5.8        | 13.5 | 27 | 31 | 3 | 3 | 1 |

**1-[(1R,2R)-2-(Pentan-3-ylamino)-1,2-diphenylethyl]-3-(perfluorophenyl)thiourea (1h)**

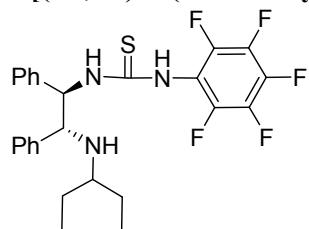

HRMS (FAB<sup>+</sup>) for C<sub>26</sub>H<sub>27</sub>F<sub>5</sub>N<sub>3</sub>S [M+H]<sup>+</sup> Calcd: 508.1846, Found: 508.1823.

[ Elemental Composition ]

Data : HFAB2008000818-010

Date : 04-Aug-108 14:20

Sample: KHJ-376

Note : in with MC

Inlet : Direct

Ion Mode : FAB+

RT : 1.25 min

Scan#: 16

Elements : C 26/0, H 27/0, N 3/0, F 5/0, S 1/0

Mass Tolerance : 20ppm, 10mmu if m/z < 500, 50mmu if m/z > 2500

Unsaturation (U.S.) : 0.0 - 100.0

| Observed m/z  | Int%        | U.S. | C                                              | H                                   | N                        | F            | S |
|---------------|-------------|------|------------------------------------------------|-------------------------------------|--------------------------|--------------|---|
| 508.1823      | 100.0       |      |                                                |                                     |                          |              |   |
| Estimated m/z | Error [ppm] | U.S. | C <td>H <td>N <td>F <td>S</td> </td></td></td> | H <td>N <td>F <td>S</td> </td></td> | N <td>F <td>S</td> </td> | F <td>S</td> | S |
| 508.1846      | -4.5        | 13.5 | 26                                             | 27                                  | 3                        | 5            | 1 |

**1-(2,6-Difluorophenyl)-3-[(1R,2R)-2-(pentan-3-ylamino)-1,2-diphenylethyl]thiourea (1i)**

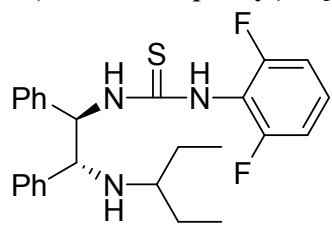

HRMS(FAB<sup>+</sup>) for C<sub>26</sub>H<sub>30</sub>F<sub>2</sub>N<sub>3</sub>S[M+H]<sup>+</sup> Calcd: 454.2129, Found: 454.2133



[ Mass Spectrum ]  
 Data : HFAB202002721-024 Date : 16-Jul-10 20:51  
 Sample: KHJ-364  
 Note : in with MC  
 Inlet : Direct Ion Mode : FAB+  
 Spectrum Type : Normal Ion [EF-Linear]  
 RT : 1.17 min Scan# : 15  
 BP : m/z 454.2133 Int. : 152.19  
 Output m/z range : 330.0000 to 575.0000 Cut Level : 0.00 %

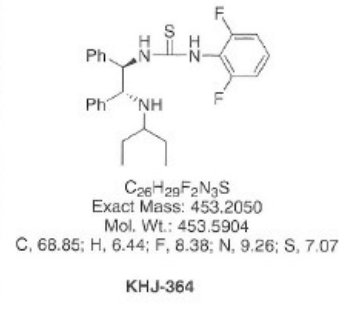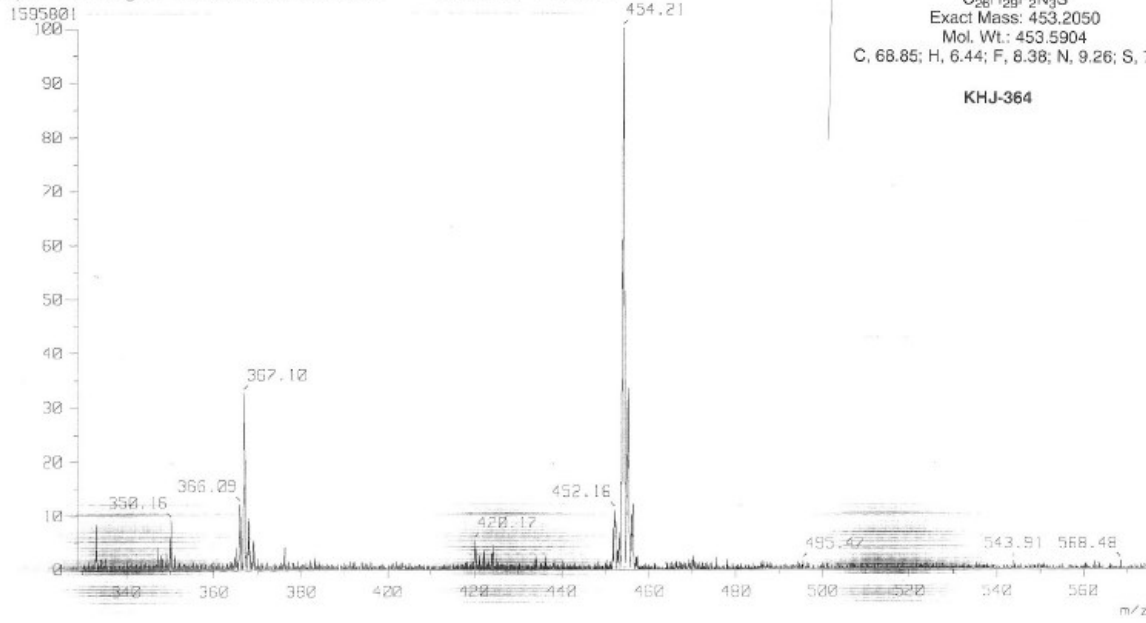

**Ethyl-2-acetyl-4-nitro-3-phenylbutanoate(4a)**

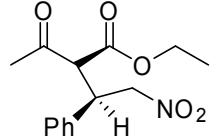

HRMS (FAB<sup>+</sup>) Calcd. for [C<sub>14</sub>H<sub>18</sub>NO<sub>5</sub>]<sup>+</sup>: 280.1185; Found: 280.1187

Instrument : MStation  
 Sample : 1  
 Note : m-NBA  
 Inlet : Direct Ion Mode : FAB+  
 RT : 0.85 min Scan# : (25,113)  
 Elements : C 100/0, H 100/0, N 5/0, O 10/0  
 Mass Tolerance : 1000ppm, 5mmu if m/z < 5, 10mmu if m/z > 10  
 Unsaturation (U.S.) : -0.5 - 10.0

| Observed m/z | Int%  | Err [ppm / mmu] | U.S. | Composition   |
|--------------|-------|-----------------|------|---------------|
| 1 280.1187   | 60.05 | +5.5 / +1.5     | 7.0  | C12 H16 N4 O4 |
| 2            |       | +0.7 / +0.2     | 6.5  | C14 H18 N O5  |
| 3            |       | -25.0 / -7.0    | 2.5  | C8 H18 N5 O6  |
| 4            |       | -29.8 / -8.4    | 2.0  | C10 H20 N2 O7 |
| 5            |       | +15.1 / +4.2    | 2.5  | C9 H18 N3 O7  |
| 6            |       | +10.3 / +2.9    | 2.0  | C11 H20 O8    |

**Ethyl-2-acetyl-2-methyl-4-nitro-3-phenylbutanoate(4b)**

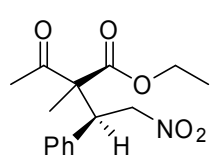

HRMS (FAB<sup>+</sup>) Calcd. for [C<sub>15</sub>H<sub>20</sub>NO<sub>5</sub>]<sup>+</sup>: 294.1341

Instrument : MStation  
 Sample : 9  
 Note : m-NBA  
 Inlet : Direct Ion Mode : FAB+  
 RT : 0.66 min Scan# : (20,28)  
 Elements : C 100/0, H 100/0, N 5/0, O 10/0  
 Mass Tolerance : 1000ppm, 5mmu if m/z < 5, 10mmu if m/z > 10  
 Unsaturation (U.S.) : 0.0 - 15.0

| Observed m/z | Int%  | Err [ppm / mmu] | U.S. | Composition   |
|--------------|-------|-----------------|------|---------------|
| 1 294.1342   | 29.44 | -22.6 / -6.7    | 15.0 | C23 H18       |
| 2            |       | -4.4 / -1.3     | 11.5 | C16 H16 N5 O  |
| 3            |       | -8.9 / -2.6     | 11.0 | C18 H18 N2 O2 |
| 4            |       | +33.8 / +9.9    | 11.5 | C17 H16 N3 O2 |
| 5            |       | +29.3 / +8.6    | 11.0 | C19 H18 O3    |
| 6            |       | +4.7 / +1.4     | 7.0  | C13 H18 N4 O4 |
| 7            |       | +0.2 / +0.1     | 6.5  | C15 H20 N O5  |
| 8            |       | -24.3 / -7.2    | 2.5  | C9 H20 N5 O6  |
| 9            |       | -28.9 / -8.5    | 2.0  | C11 H22 N2 O7 |
| 10           |       | +13.9 / +4.1    | 2.5  | C10 H20 N3 O7 |
| 11           |       | +9.3 / +2.7     | 2.0  | C12 H22 O8    |

**Ethyl-1-(2-nitro-1-phenylethyl)-2-oxocyclopentanecarboxylate(4c)**

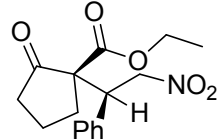

HRMS(FAB<sup>+</sup>) Calcd. for C<sub>16</sub>H<sub>20</sub>NO<sub>5</sub> Na:306.1341, found: 306.1341

Instrument : MStation  
 Sample : 2  
 Note : m-NBA  
 Inlet : Direct Ion Mode : FAB+  
 RT : 0.14 min Scan# : (5,11)  
 Elements : C 100/0, H 100/0, N 5/0, O 10/0  
 Mass Tolerance : 1000ppm, 5mmu if m/z < 5, 10mmu if m/z > 10  
 Unsaturation (U.S.) : 0.0 - 15.0

| Observed m/z | Int%  | Err [ppm / mmu] | U.S. | Composition   |
|--------------|-------|-----------------|------|---------------|
| 1 306.1341   | 21.87 | -4.5 / -1.4     | 12.5 | C17 H16 N5 O  |
| 2            |       | -8.9 / -2.7     | 12.0 | C19 H18 N2 O2 |
| 3            |       | +32.2 / +9.8    | 12.5 | C18 H16 N3 O2 |
| 4            |       | +27.8 / +8.5    | 12.0 | C20 H18 O3    |
| 5            |       | +4.2 / +1.3     | 8.0  | C14 H18 N4 O4 |
| 6            |       | -0.2 / -0.0     | 7.5  | C16 H20 N O5  |
| 7            |       | -23.7 / -7.3    | 3.5  | C10 H20 N5 O6 |
| 8            |       | -28.1 / -8.6    | 3.0  | C12 H22 N2 O7 |
| 9            |       | +13.0 / +4.0    | 3.5  | C11 H20 N3 O7 |
| 10           |       | +8.6 / +2.6     | 3.0  | C13 H22 O8    |

**Methyl-1-(2-nitro-1-phenylethyl)-2-oxocyclopentanecarboxylate (4d)**

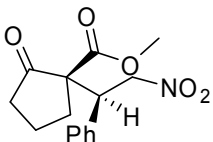

HRMS(FAB<sup>+</sup>) Calcd. for C<sub>15</sub>H<sub>19</sub>NO<sub>5</sub> : 292.1185, found: 292.1180

Instrument : MStation

Sample : 8

Note : m-NBA

Inlet : Direct Ion Mode : FAB+

RT : 2.79 min Scan# : (82,97)

Elements : C 100/0, H 100/0, N 5/0, O 10/0

Mass Tolerance : 1000ppm, 5mmu if m/z < 5, 10mmu if m/z > 10

Unsaturation (U.S.) : 0.0 - 15.0

|    | Observed m/z | Int% | Err [ppm / mmu] | U.S. | Composition   |
|----|--------------|------|-----------------|------|---------------|
| 1  | 292.1180     | 3.08 | -6.3 / -1.8     | 12.5 | C16 H14 N5 O  |
| 2  |              |      | -10.9 / -3.2    | 12.0 | C18 H16 N2 O2 |
| 3  |              |      | +32.2 / +9.4    | 12.5 | C17 H14 N3 O2 |
| 4  |              |      | +27.6 / +8.1    | 12.0 | C19 H16 O3    |
| 5  |              |      | +2.9 / +0.8     | 8.0  | C13 H16 N4 O4 |
| 6  |              |      | -1.7 / -0.5     | 7.5  | C15 H18 N O5  |
| 7  |              |      | -26.4 / -7.7    | 3.5  | C9 H18 N5 O6  |
| 8  |              |      | -31.0 / -9.1    | 3.0  | C11 H20 N2 O7 |
| 9  |              |      | +12.1 / +3.5    | 3.5  | C10 H18 N3 O7 |
| 10 |              |      | +7.5 / +2.2     | 3.0  | C12 H20 O8    |

### Methyl-1-(2-nitro-1-phenylethyl)-2-oxocyclohexanecarboxylate(4e)

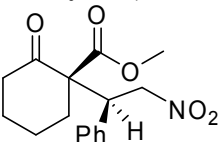

HRMS(FAB<sup>+</sup>) Calcd. for C<sub>16</sub>H<sub>20</sub>NO<sub>5</sub> : 306.1341, found: 306.1340

Instrument : MStation

Sample : 4

Note : m-NBA

Inlet : Direct Ion Mode : FAB+

RT : 2.62 min Scan# : (77,79)

Elements : C 100/0, H 100/0, N 5/0, O 10/0

Mass Tolerance : 1000ppm, 5mmu if m/z < 5, 10mmu if m/z > 10

Unsaturation (U.S.) : -0.5 - 10.0

|   | Observed m/z | Int%  | Err [ppm / mmu] | U.S. | Composition   |
|---|--------------|-------|-----------------|------|---------------|
| 1 | 306.1340     | 38.33 | +3.9 / +1.2     | 8.0  | C14 H18 N4 O4 |
| 2 |              |       | -0.5 / -0.1     | 7.5  | C16 H20 N O5  |
| 3 |              |       | -24.0 / -7.4    | 3.5  | C10 H20 N5 O6 |
| 4 |              |       | -28.4 / -8.7    | 3.0  | C12 H22 N2 O7 |
| 5 |              |       | +12.7 / +3.9    | 3.5  | C11 H20 N3 O7 |
| 6 |              |       | +8.3 / +2.5     | 3.0  | C13 H22 O8    |
| 7 |              |       | +25.8 / +7.9    | -0.5 | C6 H20 N5 O9  |

### Methyl-1,2,3,4-tetrahydro-2-(2-nitro-1-phenylethyl)-1-oxonaphthalene-2-carboxylate(4h)

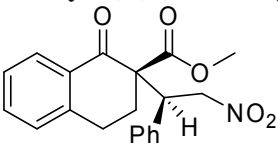

HRMS(FAB<sup>+</sup>) Calcd. for C<sub>20</sub>H<sub>20</sub>NO<sub>5</sub> : 354.1341, found: 354.1345

Instrument : MStation

Sample : 3

Note : m-NBA

Inlet : Direct Ion Mode : FAB+

RT : 0.34 min Scan# : (9,35)

Elements : C 100/0, H 100/0, N 5/0, O 10/0

Mass Tolerance : 1000ppm, 5mmu if m/z < 5, 10mmu if m/z > 10

Unsaturation (U.S.) : 5.0 - 20.0

|    | Observed m/z | Int%  | Err [ppm / mmu] | U.S. | Composition   |
|----|--------------|-------|-----------------|------|---------------|
| 1  | 354.1345     | 21.38 | -17.9 / -6.4    | 20.0 | C28 H18       |
| 2  |              |       | -2.8 / -1.0     | 16.5 | C21 H16 N5 O  |
| 3  |              |       | -6.6 / -2.3     | 16.0 | C23 H18 N2 O2 |
| 4  |              |       | +25.1 / +8.9    | 16.0 | C24 H18 O3    |
| 5  |              |       | +4.8 / +1.7     | 12.0 | C18 H18 N4 O4 |
| 6  |              |       | +1.0 / +0.4     | 11.5 | C20 H20 N O5  |
| 7  |              |       | -19.4 / -6.9    | 7.5  | C14 H20 N5 O6 |
| 8  |              |       | -23.2 / -8.2    | 7.0  | C16 H22 N2 O7 |
| 9  |              |       | +12.4 / +4.4    | 7.5  | C15 H20 N3 O7 |
| 10 |              |       | +8.6 / +3.0     | 7.0  | C17 H22 O8    |

### Methyl-1-(2-nitro-1-p-tolyloethyl)-2-oxocyclopentanecarboxylate(4i)

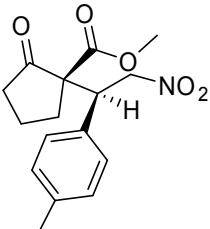

HRMS(FAB<sup>+</sup>) Calcd. for [C<sub>16</sub>H<sub>20</sub>NO<sub>5</sub>]<sup>+</sup> : 306.1341, found: 306.1340

Instrument : MStation

Sample : 4

Note : m-NBA

Inlet : Direct Ion Mode : FAB+

RT : 2.62 min Scan# : (77,79)

Elements : C 100/0, H 100/0, N 5/0, O 10/0

Mass Tolerance : 1000ppm, 5mmu if m/z < 5, 10mmu if m/z > 10

Unsaturation (U.S.) : -0.5 - 10.0

|   | Observed m/z | Int%  | Err [ppm / mmu] | U.S. | Composition   |
|---|--------------|-------|-----------------|------|---------------|
| 1 | 306.1340     | 38.33 | +3.9 / +1.2     | 8.0  | C14 H18 N4 O4 |
| 2 |              |       | -0.5 / -0.1     | 7.5  | C16 H20 N O5  |
| 3 |              |       | -24.0 / -7.4    | 3.5  | C10 H20 N5 O6 |
| 4 |              |       | -28.4 / -8.7    | 3.0  | C12 H22 N2 O7 |
| 5 |              |       | +12.7 / +3.9    | 3.5  | C11 H20 N3 O7 |
| 6 |              |       | +8.3 / +2.5     | 3.0  | C13 H22 O8    |
| 7 |              |       | +25.8 / +7.9    | -0.5 | C6 H20 N5 O9  |



**Methyl-1-{1-(4-chlorophenyl)-2-nitro}ethyl-2-oxocyclopentanecarboxylate(4j)**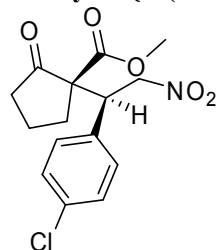HRMS(FAB<sup>+</sup>) Calcd. For [C<sub>15</sub>H<sub>16</sub>ClNO<sub>5</sub>]<sup>+</sup> : 325.0717 , found: 325.0720

Instrument : MStation

Sample : 6

Note : m-NBA

Inlet : Direct Ion Mode : FAB+

RT : 2.20 min Scan# : (65,68)

Elements : C 100/0, H 100/0, 35Cl 2/0, 37Cl 2/0, N 5/0, O 10/0

Mass Tolerance : 1000ppm, 5mmu if m/z &lt; 5, 10mmu if m/z &gt; 10

Unsaturation (U.S.) : 0.0 - 15.0

| Observed m/z | Int%     | Err [ppm / mmu] | U.S. Composition |                             |
|--------------|----------|-----------------|------------------|-----------------------------|
| 1            | 326.0796 | 13.19           | -12.6 / -4.1     | 3.5 C15 H23 35Cl 37Cl2 N    |
| 2            |          |                 | +26.0 / +8.5     | 4.0 C14 H21 35Cl 37Cl2 N2   |
| 3            |          |                 | +7.5 / +2.4      | 3.5 C13 H21 35Cl2 37Cl N3   |
| 4            |          |                 | -7.0 / -2.3      | 8.5 C16 H18 37Cl2 N3        |
| 5            |          |                 | -25.5 / -8.3     | 8.0 C15 H18 35Cl 37Cl N4    |
| 6            |          |                 | +13.1 / +4.3     | 8.5 C14 H16 35Cl 37Cl N5    |
| 7            |          |                 | +3.4 / +1.1      | 3.0 C15 H23 35Cl2 37Cl O    |
| 8            |          |                 | -11.1 / -3.6     | 8.0 C18 H20 37Cl2 O         |
| 9            |          |                 | -29.6 / -9.6     | 7.5 C17 H20 35Cl 37Cl N O   |
| 10           |          |                 | +27.5 / +9.0     | 8.5 C17 H18 37Cl2 N O       |
| 11           |          |                 | +9.0 / +2.9      | 8.0 C16 H18 35Cl 37Cl N2 O  |
| 12           |          |                 | -9.5 / -3.1      | 7.5 C15 H18 35Cl2 N3 O      |
| 13           |          |                 | -24.0 / -7.8     | 12.5 C18 H15 37Cl N3 O      |
| 14           |          |                 | +29.1 / +9.5     | 8.0 C14 H16 35Cl2 N4 O      |
| 15           |          |                 | +14.6 / +4.8     | 13.0 C17 H13 37Cl N4 O      |
| 16           |          |                 | -3.9 / -1.3      | 12.5 C16 H13 35Cl N5 O      |
| 17           |          |                 | -13.6 / -4.4     | 7.0 C17 H20 35Cl2 O2        |
| 18           |          |                 | -28.1 / -9.2     | 12.0 C20 H17 37Cl O2        |
| 19           |          |                 | +25.0 / +8.1     | 7.5 C16 H18 35Cl2 N O2      |
| 20           |          |                 | +10.5 / +3.4     | 12.5 C19 H15 37Cl N O2      |
| 21           |          |                 | -8.0 / -2.6      | 12.0 C18 H15 35Cl N2 O2     |
| 22           |          |                 | +30.6 / +10.0    | 12.5 C17 H13 35Cl N3 O2     |
| 23           |          |                 | +5.4 / +1.7      | 4.5 C11 H18 37Cl2 N5 O2     |
| 24           |          |                 | +26.5 / +8.6     | 12.0 C19 H15 35Cl O3        |
| 25           |          |                 | +1.2 / +0.4      | 4.0 C13 H20 37Cl2 N2 O3     |
| 26           |          |                 | -17.2 / -5.6     | 3.5 C12 H20 35Cl 37Cl N3 O3 |
| 27           |          |                 | +21.3 / +7.0     | 4.0 C11 H18 35Cl 37Cl N4 O3 |
| 28           |          |                 | +2.9 / +0.9      | 3.5 C10 H18 35Cl2 N5 O3     |
| 29           |          |                 | -11.6 / -3.8     | 8.5 C13 H15 37Cl N5 O3      |
| 30           |          |                 | -21.4 / -7.0     | 3.0 C14 H22 35Cl 37Cl O4    |
| 31           |          |                 | +17.2 / +5.6     | 3.5 C13 H20 35Cl 37Cl N O4  |
| 32           |          |                 | -1.3 / -0.4      | 3.0 C12 H20 35Cl2 N2 O4     |
| 33           |          |                 | -15.7 / -5.1     | 8.0 C15 H17 37Cl N2 O4      |
| 34           |          |                 | +22.8 / +7.4     | 8.5 C14 H15 37Cl N3 O4      |
| 35           |          |                 | +4.3 / +1.4      | 8.0 C13 H15 35Cl N4 O4      |
| 36           |          |                 | -28.6 / -9.3     | 12.5 C15 H12 N5 O4          |
| 37           |          |                 | +18.7 / +6.1     | 8.0 C16 H17 37Cl O5         |
| 38           |          |                 | +0.2 / +0.1      | 7.5 C15 H17 35Cl N O5       |

**Methyl-1-{1-(4-bromophenyl)-2-nitroethyl}-2-oxocyclopentanecarboxylate(4k)**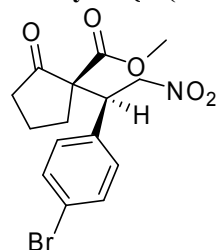HRMS(FAB<sup>+</sup>) Calcd. for [C<sub>15</sub>H<sub>17</sub>BrNO<sub>5</sub>]<sup>+</sup> :370.0290, found: 370.0288

Instrument : MStation

Sample : 5

Note : m-NBA

Inlet : Direct Ion Mode : FAB+

RT : 2.62 min Scan# : (88,93)

Elements : C 100/0, H 100/0, 79Br 2/0, 81Br 2/0, N 3/0, O 10/0

Mass Tolerance : 1000ppm, 5mmu if m/z &lt; 5, 10mmu if m/z &gt; 10

Unsaturation (U.S.) : 0.0 - 15.0

| Observed m/z | Int%     | Err [ppm / mmu] | U.S. Composition |                           |
|--------------|----------|-----------------|------------------|---------------------------|
| 1            | 370.0288 | 3.42            | +6.1 / +2.3      | 2.0 C13 H24 81Br2 N2      |
| 2            |          |                 | -7.7 / -2.8      | 1.5 C12 H24 79Br 81Br N3  |
| 3            |          |                 | -11.3 / -4.2     | 1.0 C14 H26 79Br 81Br O   |
| 4            |          |                 | -25.2 / -9.3     | 0.5 C13 H26 79Br2 N O     |
| 5            |          |                 | +22.7 / +8.4     | 1.5 C13 H24 79Br 81Br N O |
| 6            |          |                 | +8.8 / +3.3      | 1.0 C12 H24 79Br2 N2 O    |
| 7            |          |                 | -24.3 / -9.0     | 12.5 C18 H15 81Br N3 O    |
| 8            |          |                 | +6.0 / +2.2      | 12.5 C19 H15 81Br N O2    |
| 9            |          |                 | -7.8 / -2.9      | 12.0 C18 H15 79Br N2 O2   |
| 10           |          |                 | +26.2 / +9.7     | 12.5 C17 H13 79Br N3 O2   |
| 11           |          |                 | +22.6 / +8.3     | 12.0 C19 H15 79Br O3      |
| 12           |          |                 | -17.1 / -6.3     | 8.0 C15 H17 81Br N2 O4    |
| 13           |          |                 | +16.9 / +6.3     | 8.5 C14 H15 81Br N3 O4    |
| 14           |          |                 | +13.3 / +4.9     | 8.0 C16 H17 81Br O5       |
| 15           |          |                 | -0.6 / -0.2      | 7.5 C15 H17 79Br N O5     |
| 16           |          |                 | -9.8 / -3.6      | 3.5 C12 H19 81Br N O7     |
| 17           |          |                 | -23.7 / -8.8     | 3.0 C11 H19 79Br N2 O7    |
| 18           |          |                 | +24.1 / +8.9     | 4.0 C11 H17 81Br N2 O7    |
| 19           |          |                 | +10.3 / +3.8     | 3.5 C10 H17 79Br N3 O7    |
| 20           |          |                 | +6.7 / +2.5      | 3.0 C12 H19 79Br O8       |
| 21           |          |                 | -6.3 / -2.3      | 14.5 C16 H8 N3 O8         |
| 22           |          |                 | -10.0 / -3.7     | 14.0 C18 H10 O9           |
| 23           |          |                 | +24.0 / +8.9     | 14.5 C17 H8 N O9          |

**Methyl-1-(1-(4-methoxyphenyl)-2-nitroethyl)-2-oxocyclopentane-carboxylate(4l)**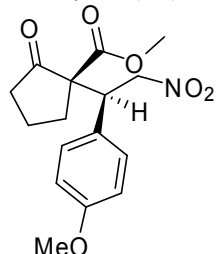HRMS(FAB<sup>+</sup>) Calcd. for [C<sub>16</sub>H<sub>19</sub>NO<sub>6</sub>]<sup>+</sup> : 321.1212, found: 321.1210

Instrument : MStation

Sample : 7

Note : m-NBA

Inlet : Direct Ion Mode : FAB+

RT : 0.21 min Scan# : (7,43)

Elements : C 100/0, H 100/0, N 5/0, O 10/0

Mass Tolerance : 1000ppm, 5mmu if m/z < 5, 10mmu if m/z > 10

Unsaturation (U.S.) : 0.0 - 15.0

|    | Observed m/z | Int%  | Err [ppm / mmu] | U.S. | Composition   |
|----|--------------|-------|-----------------|------|---------------|
| 1  | 321.1210     | 81.74 | -4.9 / -1.6     | 13.0 | C17 H15 N5 O2 |
| 2  |              |       | -9.1 / -2.9     | 12.5 | C19 H17 N2 O3 |
| 3  |              |       | +30.1 / +9.7    | 13.0 | C18 H15 N3 O3 |
| 4  |              |       | +25.9 / +8.3    | 12.5 | C20 H17 O4    |
| 5  |              |       | +3.4 / +1.1     | 8.5  | C14 H17 N4 O5 |
| 6  |              |       | -0.7 / -0.2     | 8.0  | C16 H19 N O6  |
| 7  |              |       | -23.2 / -7.4    | 4.0  | C10 H19 N5 O7 |
| 8  |              |       | -27.4 / -8.8    | 3.5  | C12 H21 N2 O8 |
| 9  |              |       | +11.8 / +3.8    | 4.0  | C11 H19 N3 O8 |
| 10 |              |       | +7.6 / +2.4     | 3.5  | C13 H21 O9    |
| 11 |              |       | +24.3 / +7.8    | 0.0  | C6 H19 N5 O10 |

### Methyl-1-(1-(2-methoxyphenyl)-2-nitroethyl)-2-oxocyclopentane-carboxylate(4m)

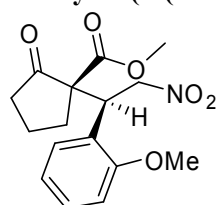

LRMS(ESI) Calcd. for  $[C_{16}H_{19}NO_6Na]^+$  :344.1110, found: 344.1137

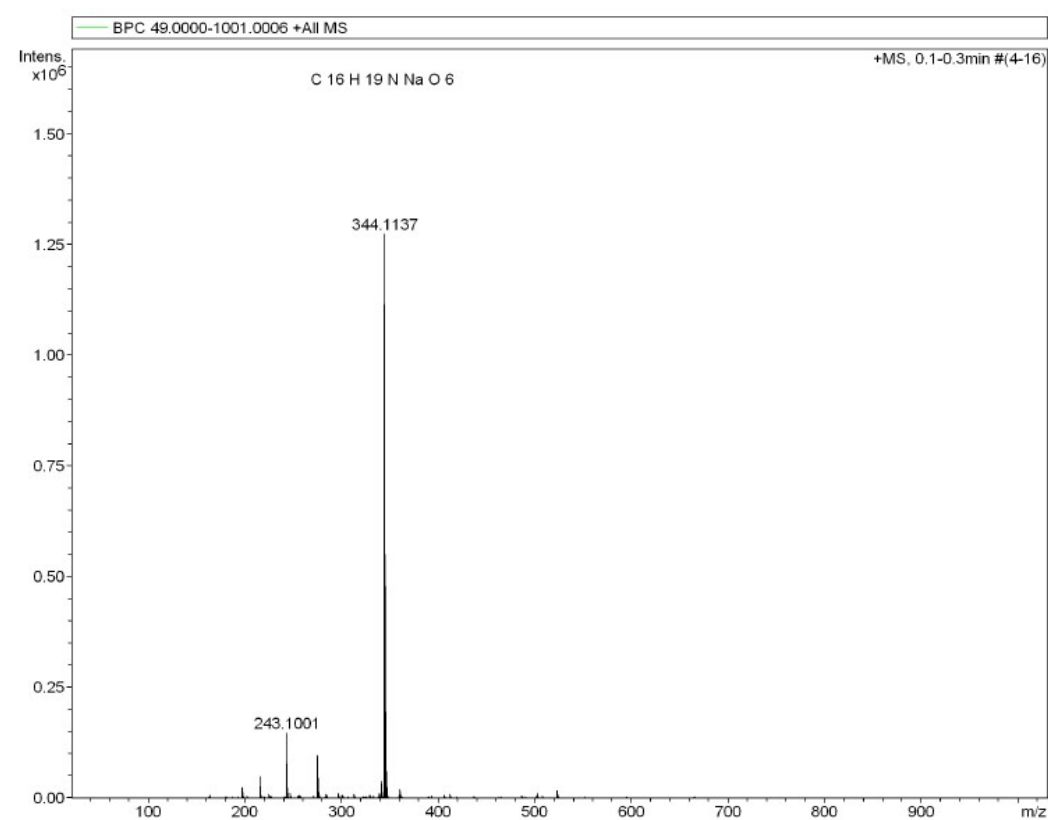

### Methyl-1-(1-nitrohexan-2-yl)-2-oxocyclopentanecarboxylate(4n)

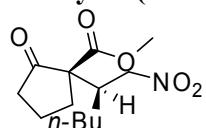

LRMS(ESI) Calcd. for  $[C_{13}H_{21}NO_5Na]^+$  :294.1317, found: 294.1352

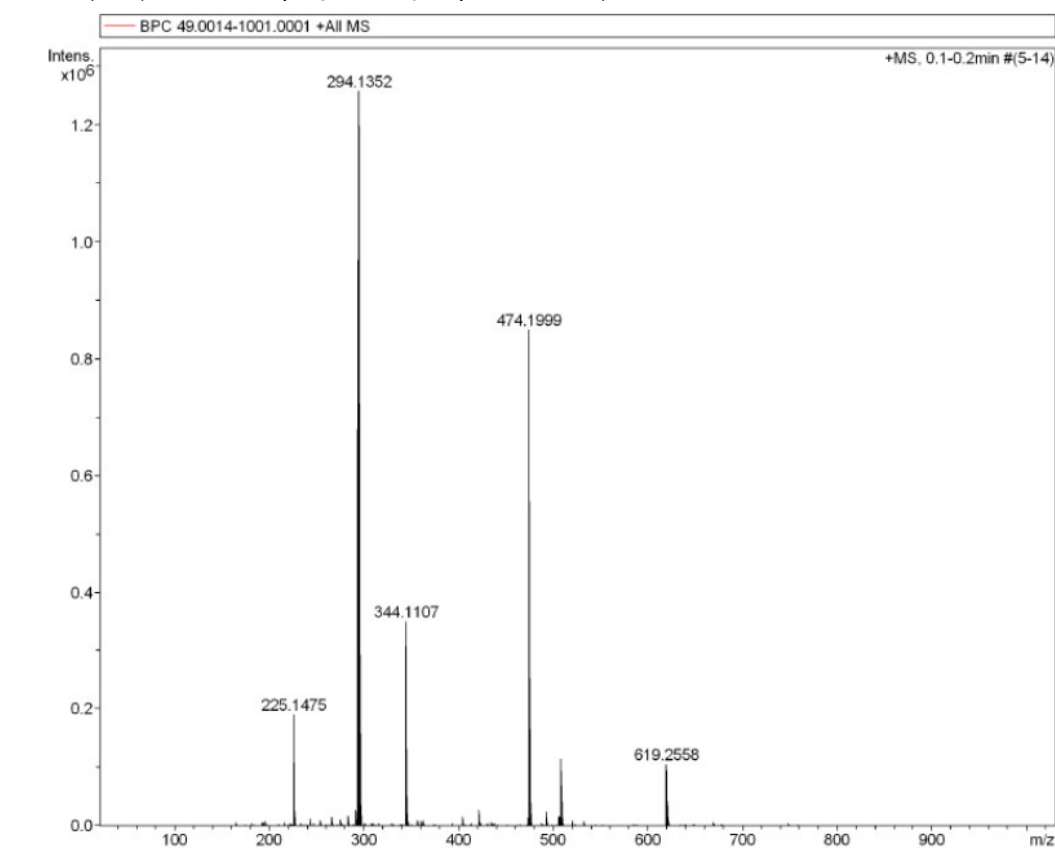

### Methyl-1-(2-nitro-1-p-tolyethyl)-2-oxocyclohexanecarboxylate(4q)

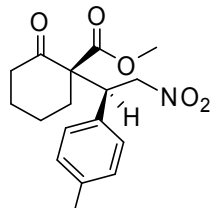

LRMS(ESI) Calcd. for  $[C_{17}H_{21}NO_5Na]^+$  : 342.1317, found: 342.1297



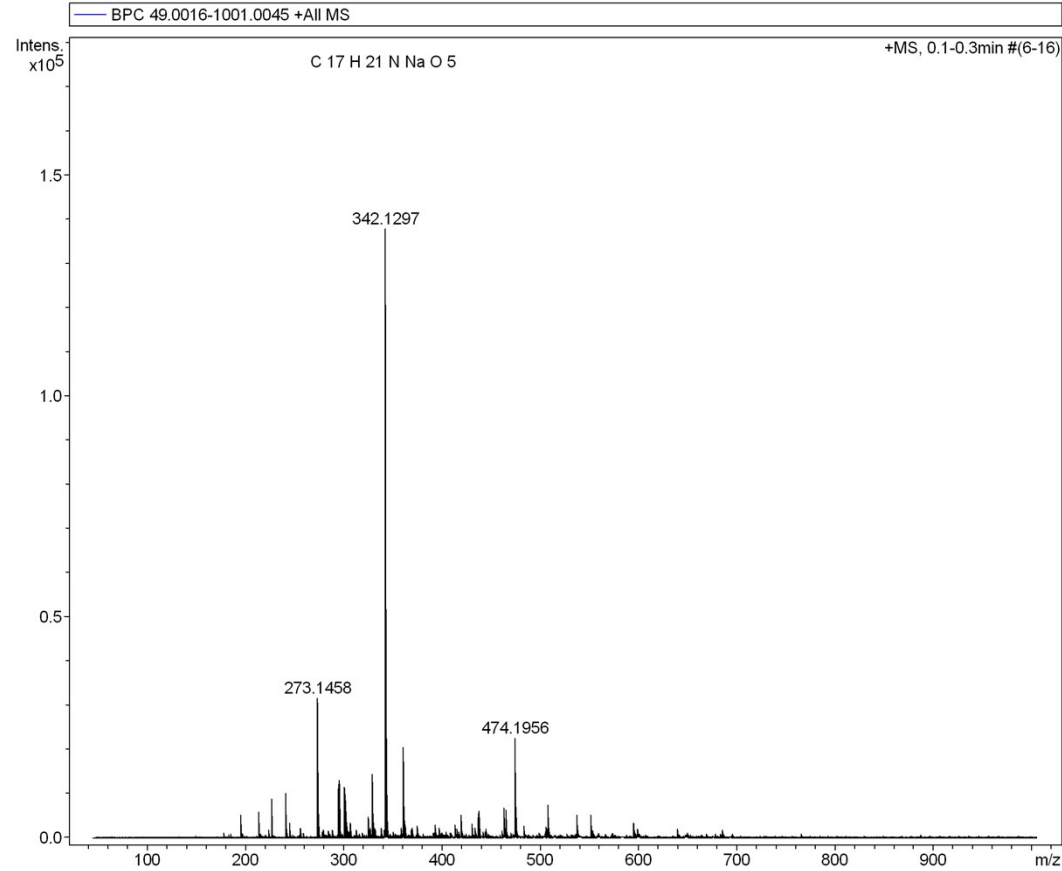

**Methyl-1-(1-(4-chlorophenyl)-2-nitroethyl)-2-oxocyclohexanecarboxylate(4r)**

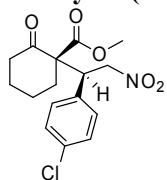

LRMS(ESI) Calcd for [C<sub>16</sub>H<sub>18</sub>ClNO<sub>5</sub>Na]<sup>+</sup> : 362.0771, found: 362.0763

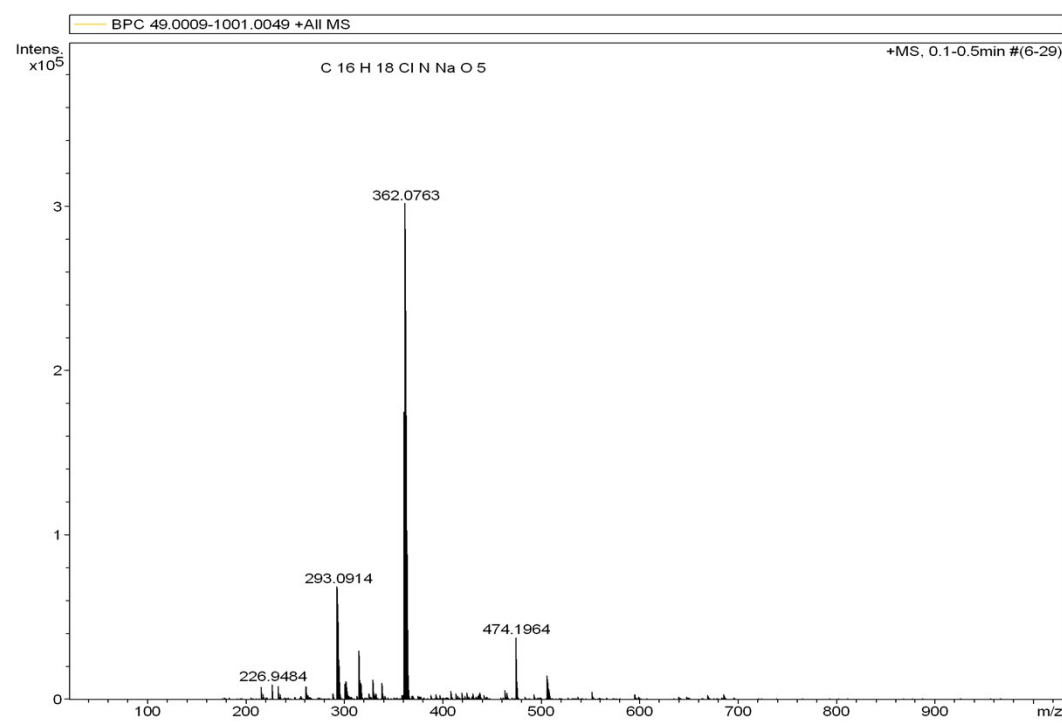

**Methyl-1-(1-(4-bromophenyl)-2-nitroethyl)-2-oxocyclohexanecarboxylate(4s)**

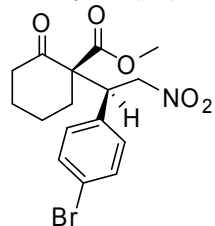

LRMS(ESI) Calcd. for [C<sub>16</sub>H<sub>18</sub>BrNO<sub>5</sub>Na]<sup>+</sup> : 406.0266, found: 408.0255

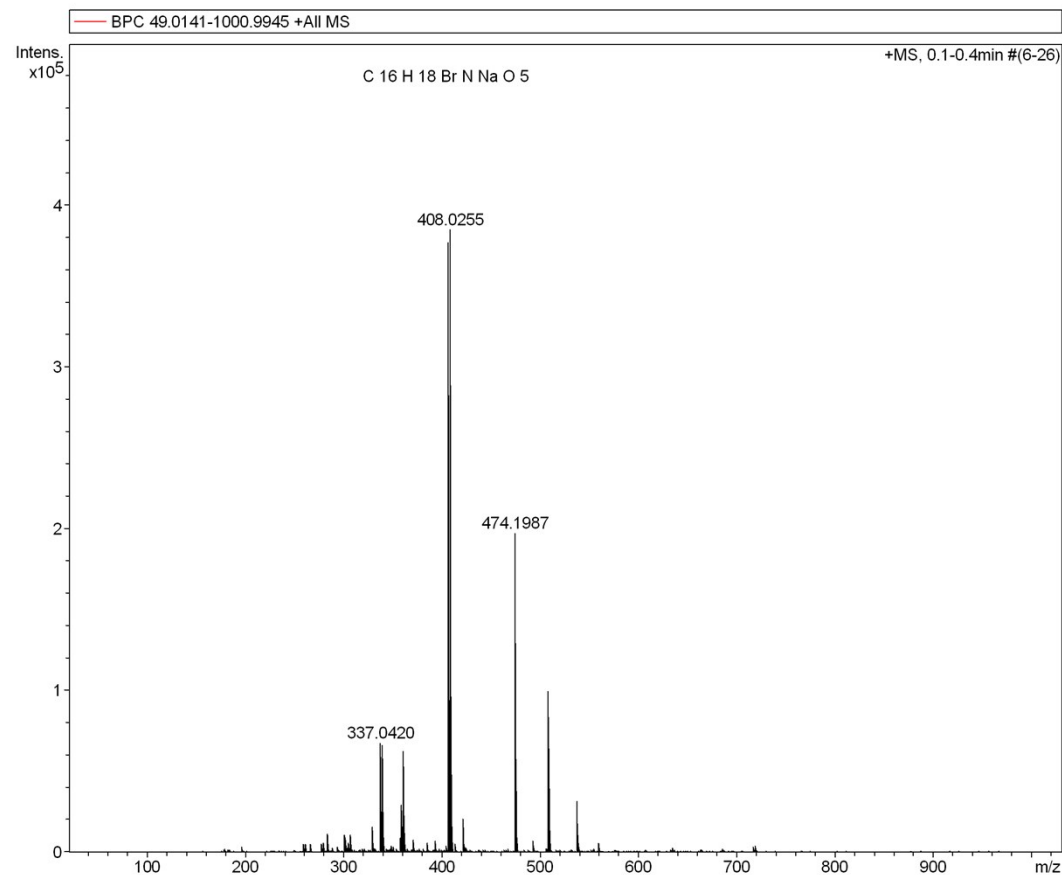

**Methyl-1-(1-(4-methoxyphenyl)-2-nitroethyl)-2-oxocyclohexane-carboxylate(4t)**

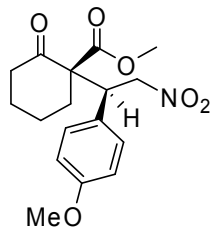

LRMS(ESI) Calcd. for  $[C_{17}H_{21}NO_6Na]^+$  : 358.1267, found: 358.1252

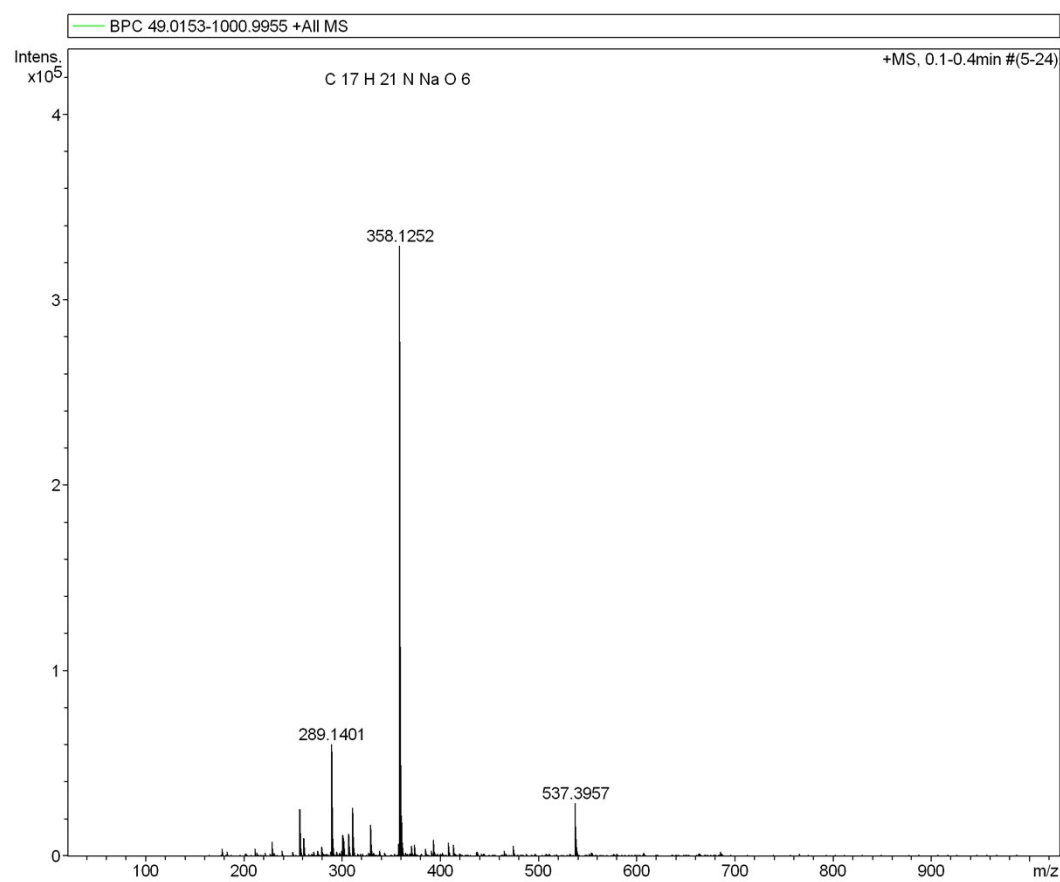

### Dimethyl 2-(2-nitro-1-phenylethyl)malonate (5a)

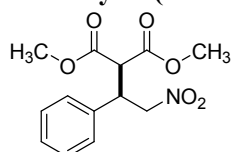

HRMS(ESI) for  $C_{13}H_{16}N_1O_6[M+H]^+$  Calcd: 282.09721, Found: 282.09726

s3-2 #1 RT: 0.01 AV: 1 NL: 1.03E4  
T: FTMS + p ESI Full ms [150.00-310.00]

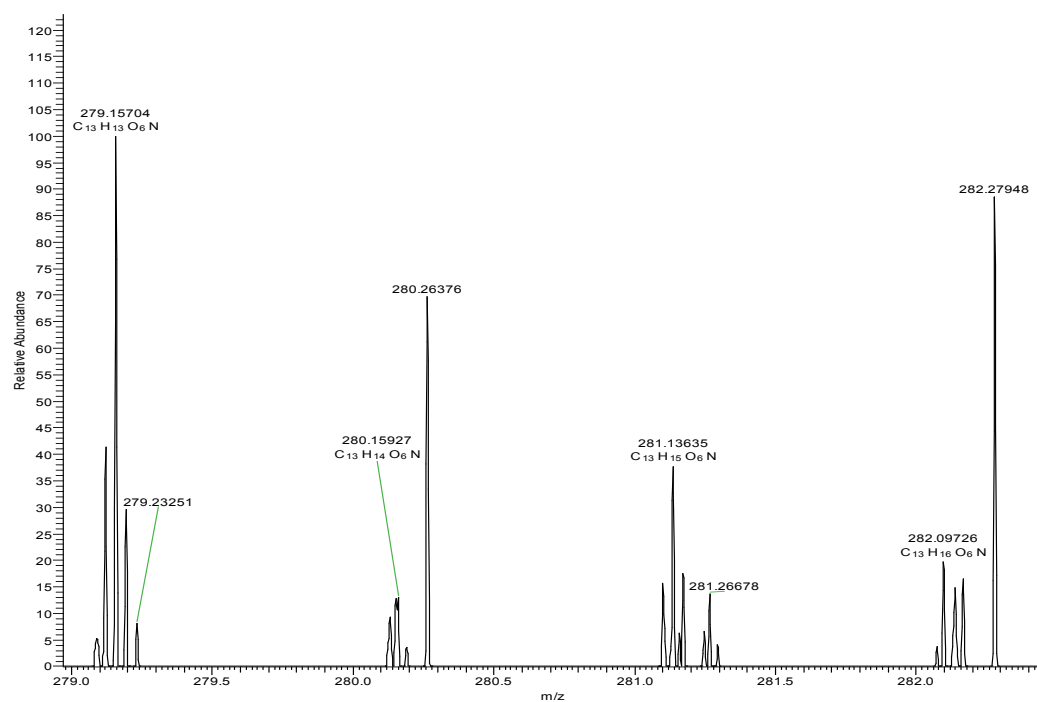

### Diethyl 2-(2-nitro-1-phenylethyl)malonate (5b)

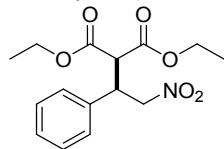

HRMS(ESI) for  $C_{15}H_{20}N_1O_6[M+H]^+$  Calcd: 310.12851, Found: 310.12936

s4 #313 RT: 4.46 AV: 1 NL: 1.91E4  
T: FTMS + p ESI Full ms [150.00-400.00]

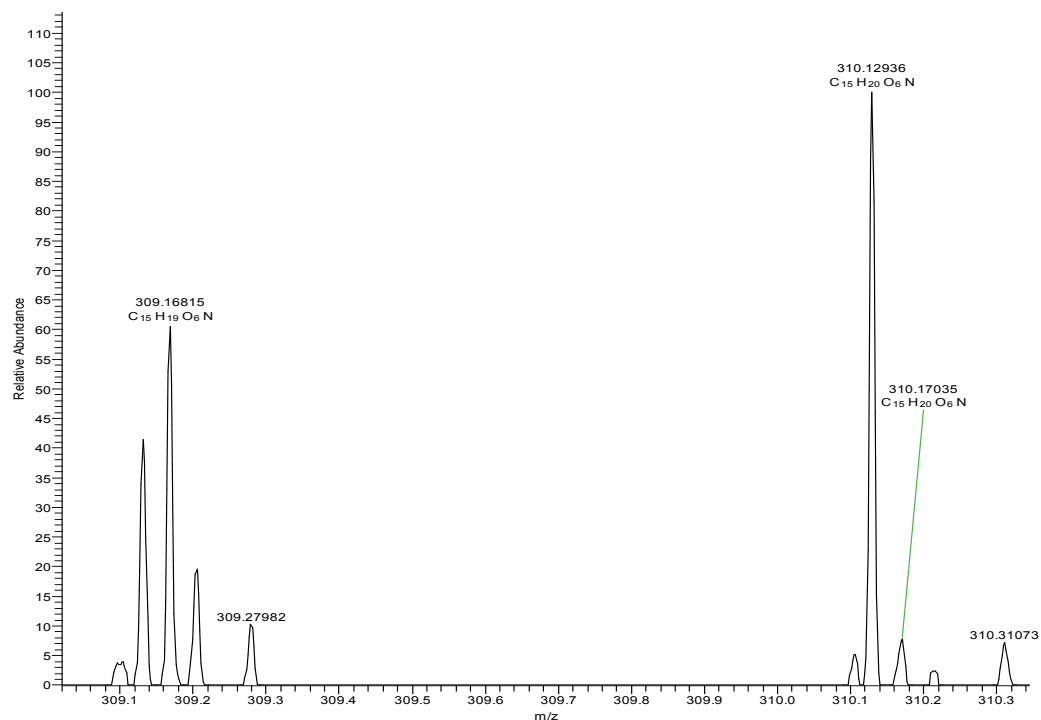

### Diisopropyl 2-(2-nitro-1-phenylethyl)malonate (5c)

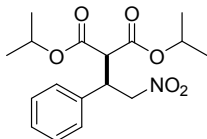

HRMS(ESI) for C<sub>17</sub>H<sub>24</sub>N<sub>1</sub>O<sub>6</sub>[M+H]<sup>+</sup> Calcd: 338.15981 Found: 338.16336

s10-1 #210 RT: 3.20 AV: 1 NL: 2.98E2  
T: FTMS + p ESI Full ms [250.00-430.00]

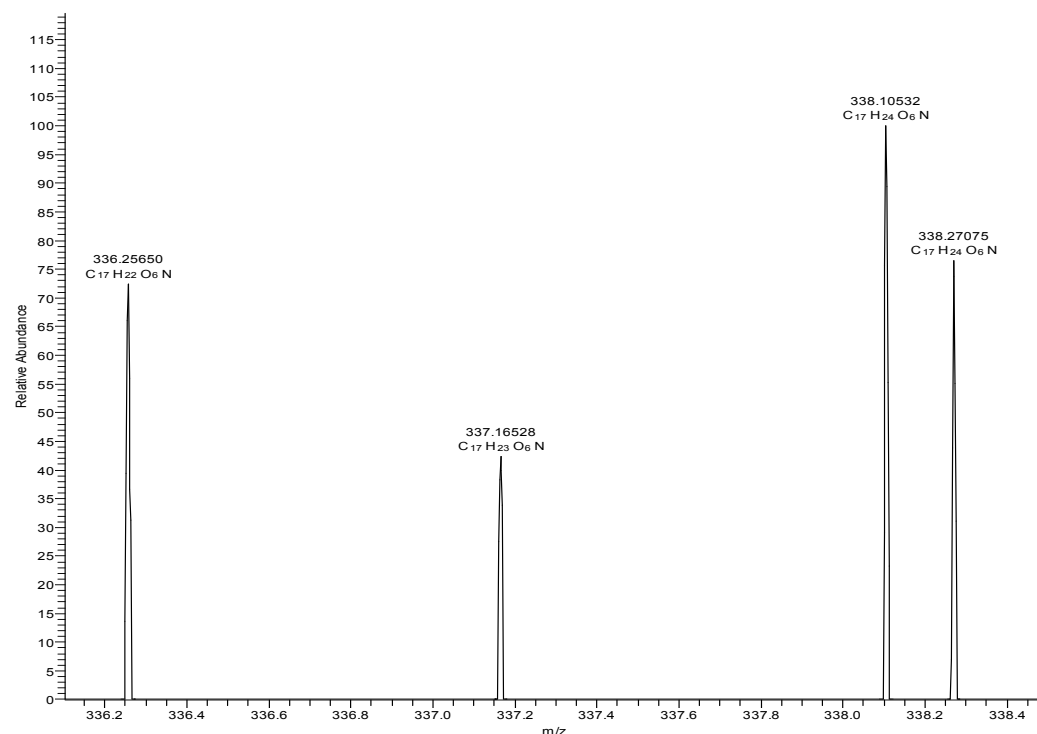

### Dipropyl 2-(2-nitro-1-phenylethyl)malonate (5d)

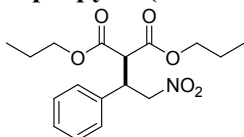

HRMS(ESI) for C<sub>17</sub>H<sub>24</sub>N<sub>1</sub>O<sub>6</sub>[M+H]<sup>+</sup> Calcd: 338.15981 Found: 338.16336

s8-2 #2 RT: 0.02 AV: 1 NL: 2.25E3  
T: FTMS + p ESI Full ms [250.00-430.00]

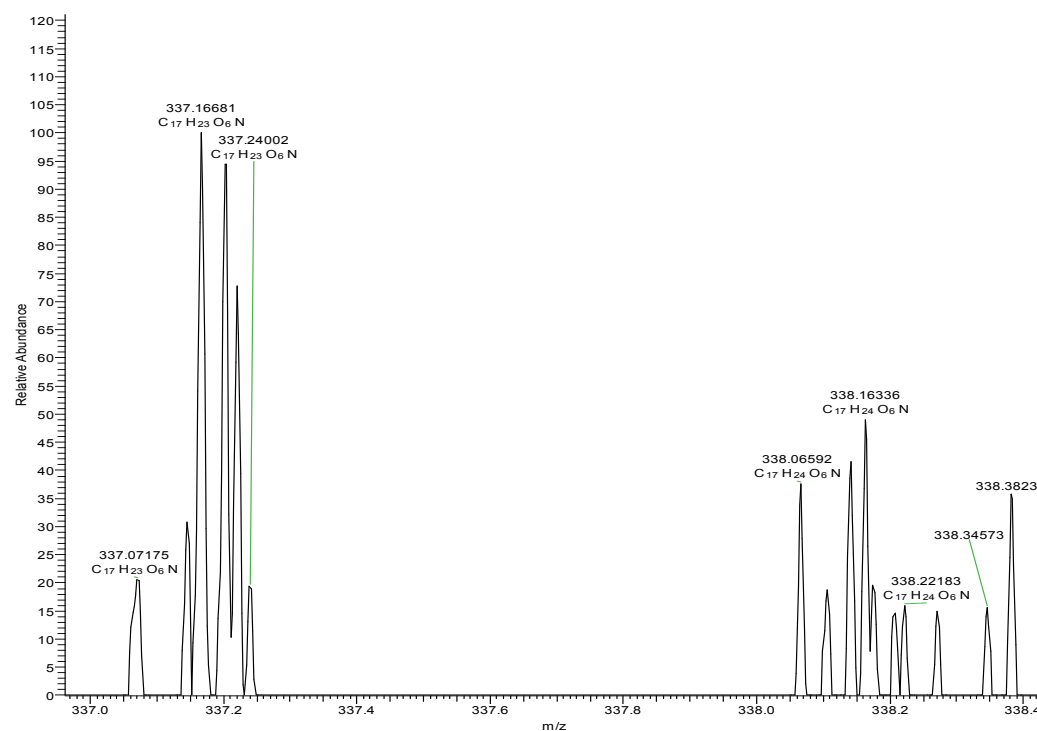

### Dibutyl 2-(2-nitro-1-phenylethyl)malonate (5e)

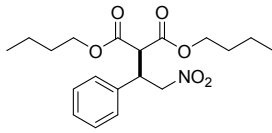

HRMS(EI) for C<sub>19</sub>H<sub>27</sub>NO<sub>6</sub>[M]<sup>+</sup> Calcd: 365.1838 Found: 365.1830

Sample: CSY- (dibutyl-mal)

Notes: -

Inlet: Direct

Ion Mode: EI+

RT: 0.70 min

Scan#: 22

Elements: C 19/0, H 27/0, N 1/0, O 6/0

Mass Tolerance: 1000ppm, 10mmu if m/z < 10, 20mmu if m/z > 20

Unsaturation (U.S.): -0.5 - 50.0

| Observed m/z | Int% | Err[ppm / mmu] | U.S. Composition    |
|--------------|------|----------------|---------------------|
| 365.1830     | 0.2  | -2.2 / -0.8    | 7.0 C 19 H 27 N O 6 |

s11-2 #14 RT: 0.16 AV: 1 NL: 1.10E3  
T: FTMS + p ESI Full ms [300.00-500.00]

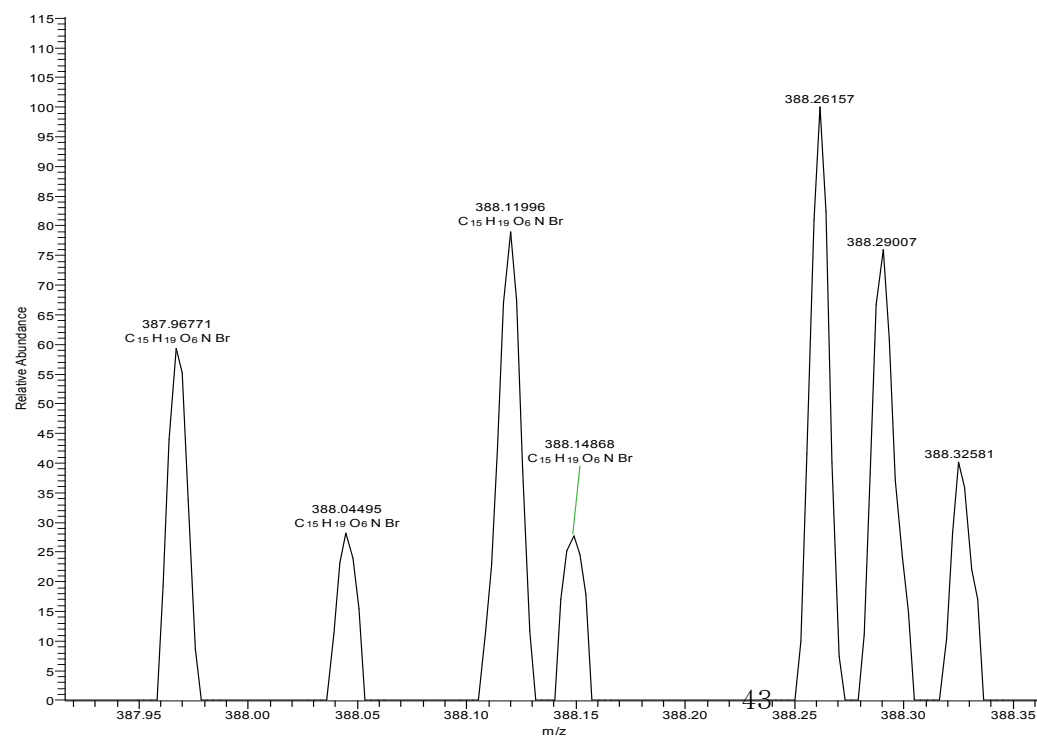

### Diethyl 2-[1-(4-bromophenyl)-2-nitroethyl]malonate (5f)

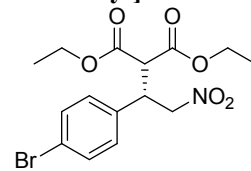

HRMS(ESI) for C<sub>15</sub>H<sub>19</sub>N<sub>1</sub>O<sub>6</sub>Br[M+H]<sup>+</sup> Calcd:

388.03903 Found: 388.04495

### Diethyl 2-(1-(4-chlorophenyl)-2-nitroethyl)malonate (5g)

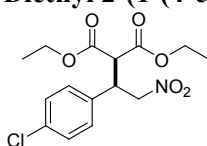

HRMS(ESI) for  $C_{15}H_{19}N_1O_6Cl[M+H]^+$  Calcd: 344.08954 Found: 344.09119

s5 #175 RT: 2.21 AV: 1 NL: 1.22E4  
T: FTMS + p ESI Full ms [250.00-440.00]

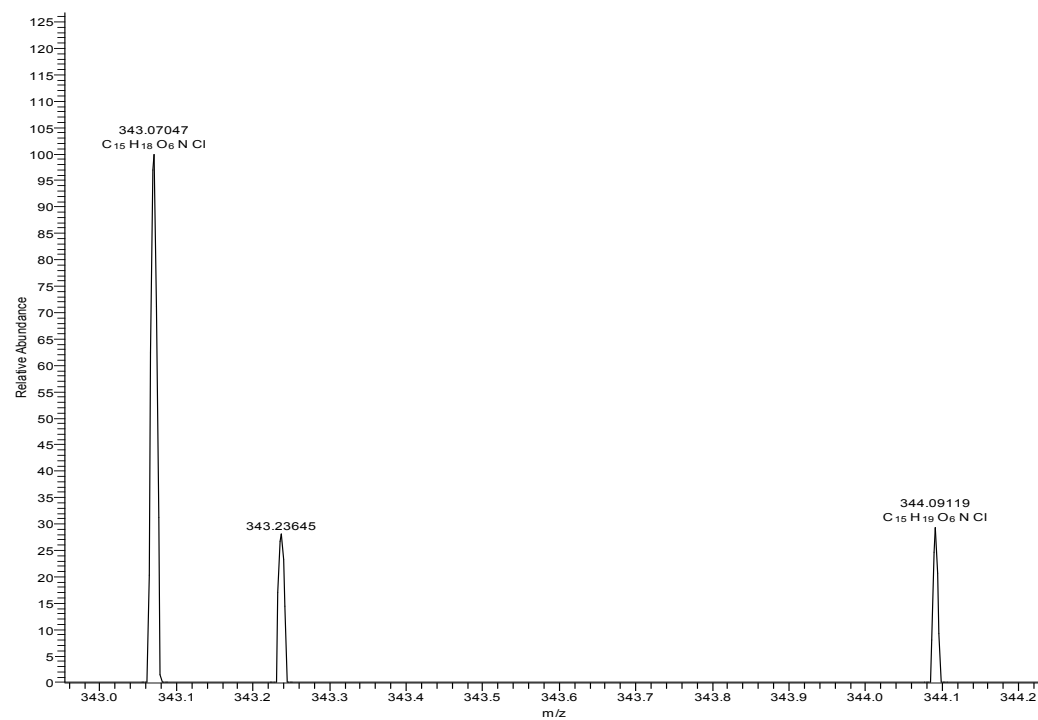

### Diethyl 2-[2-nitro-1-(*p*-tolyl)ethyl]malonate (5h)

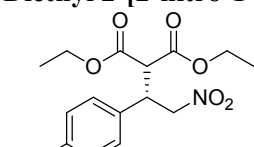

HRMS(ESI) for  $C_{16}H_{22}N_1O_6[M+H]^+$  Calcd: 324.14416 Found: 324.14648

s9-1\_141107004052 #151 RT: 2.17 AV: 1 NL: 3.87E2  
T: FTMS + p ESI Full ms [250.00-430.00]

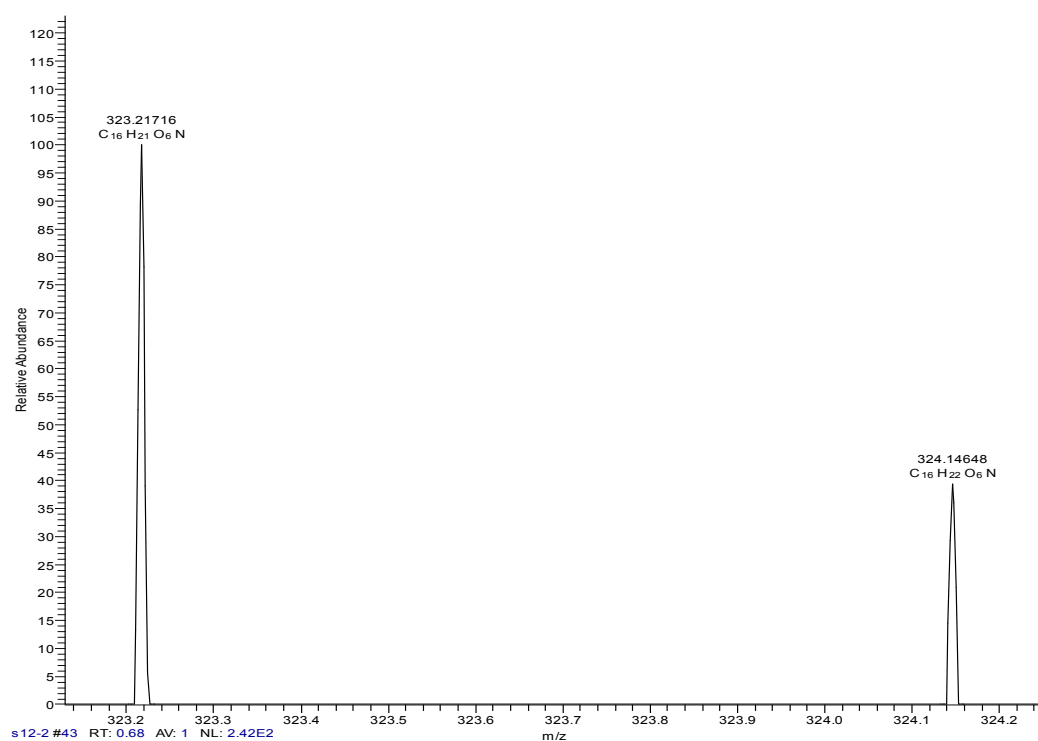

s12-2 #43 RT: 0.68 AV: 1 NL: 2.42E2  
T: FTMS + p ESI Full ms [250.00-430.00]

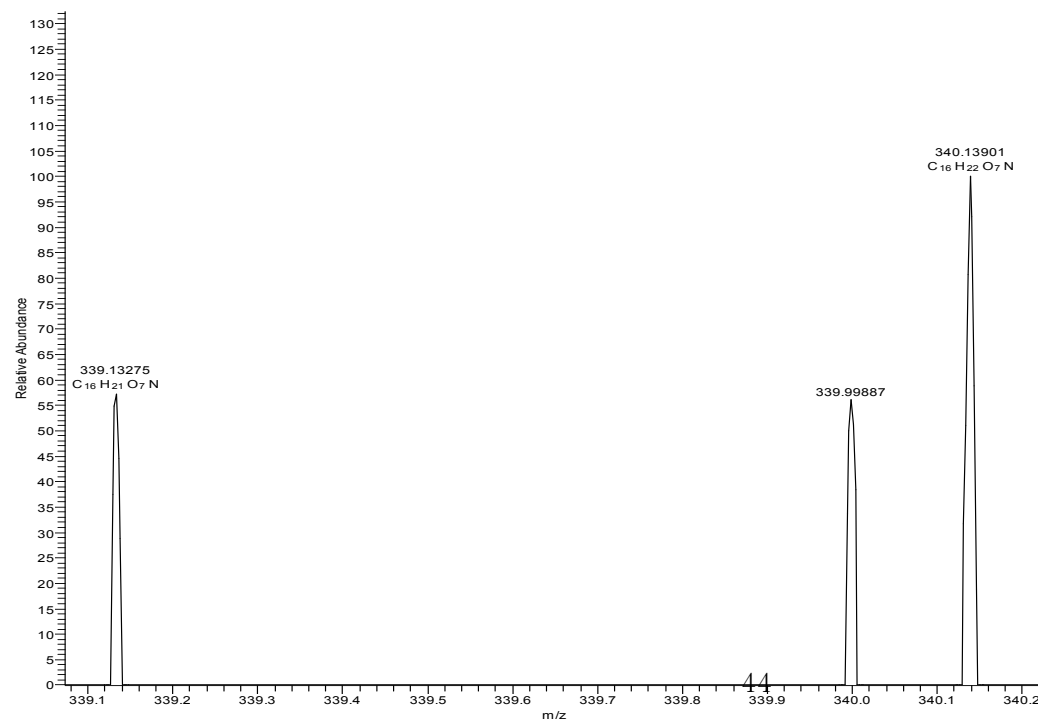

### Diethyl 2-[1-(4-methoxyphenyl)-2-nitroethyl]malonate (5i)

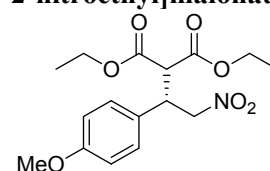

HRMS(ESI) for  $C_{16}H_{22}N_1O_7[M+H]^+$  Calcd: 340.13908 Found: 340.13901

**Diethyl 2-[1-(2-methoxyphenyl)-2-nitroethyl]malonate (5j)**

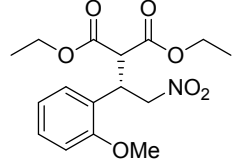

HRMS(ESI) for C<sub>16</sub>H<sub>22</sub>N<sub>1</sub>O<sub>6</sub>[M] Calcd: 339.13125 Found: 339.12933

s6 #56 RT: 0.72 AV: 1 NL: 4.84E2  
T: FTMS + p ESI Full ms [250.00-440.00]

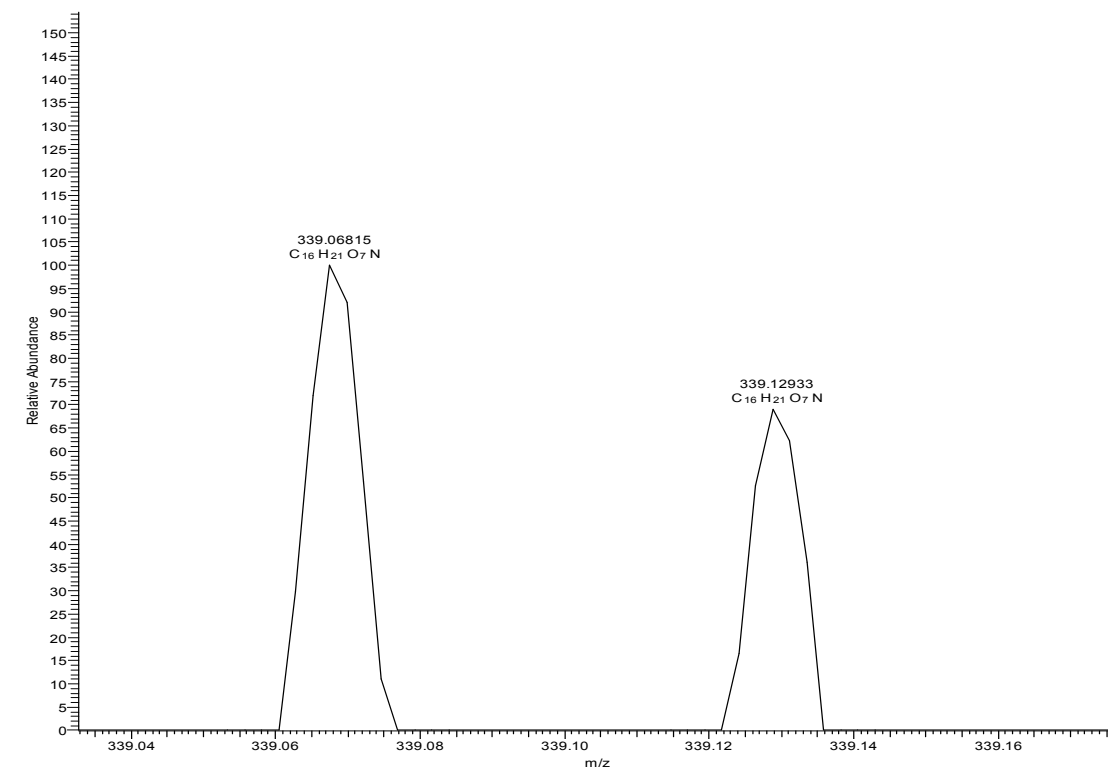

**Diethyl 2-[1-(4-hydroxyphenyl)-2-nitroethyl]malonate (5k)**

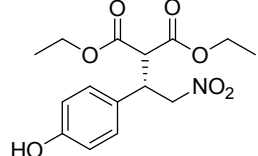

HRMS(ESI) for C<sub>15</sub>H<sub>20</sub>N<sub>1</sub>O<sub>7</sub>[M+H]<sup>+</sup> Calcd: 326.12343 Found: 326.12903

s21107-2 #73 RT: 1.16 AV: 1 NL: 2.64E2  
T: FTMS + p ESI Full ms [230.00-420.00]

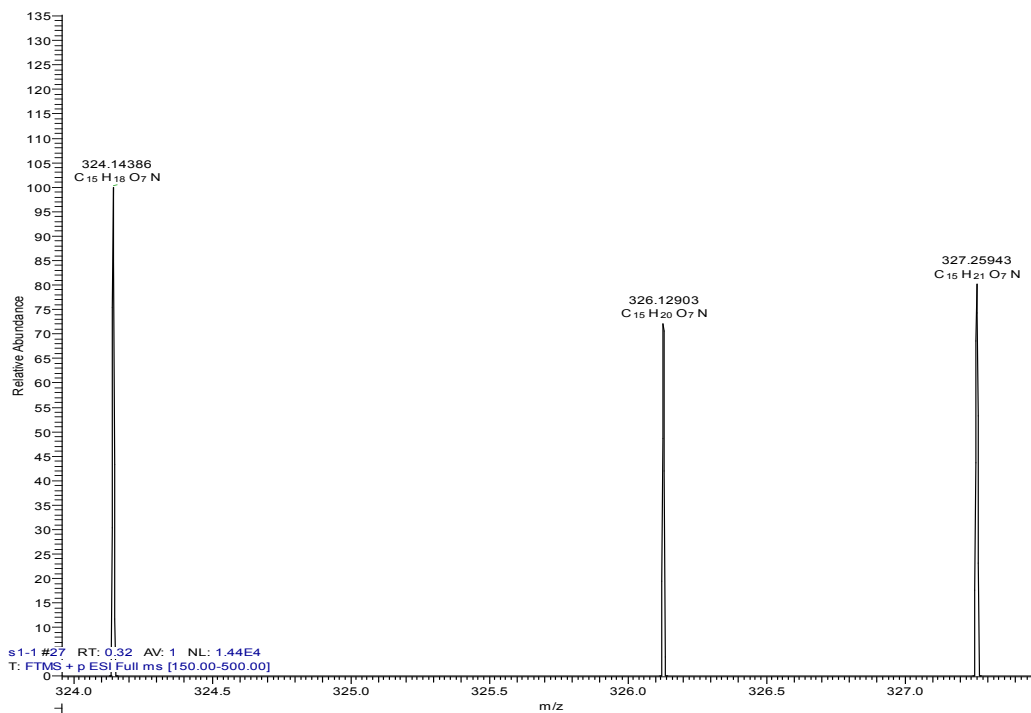

s1-1 #27 RT: 0.32 AV: 1 NL: 1.44E4  
T: FTMS + p ESI Full ms [150.00-500.00]

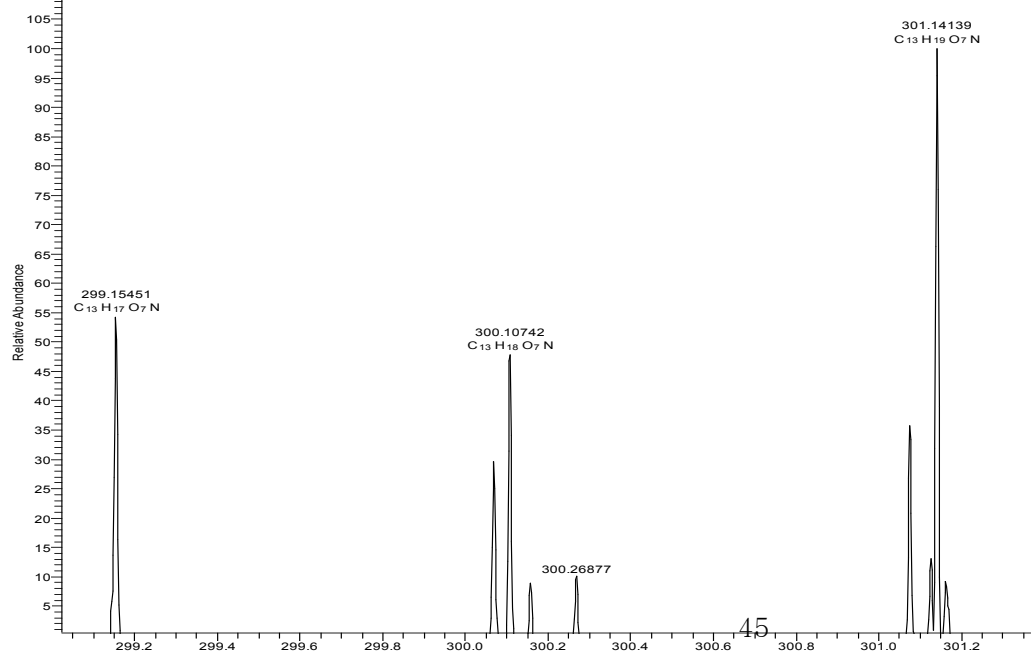

**Diethyl 2-[1-(furan-2-yl)-2-nitroethyl]malonate (5l)**

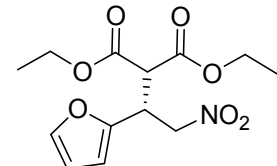

HRMS(ESI) for C<sub>13</sub>H<sub>18</sub>N<sub>1</sub>O<sub>7</sub>[M+H]<sup>+</sup> Calcd: 300.10778 Found: 300.10742

### 4-amino-3-phenylbutanoic acid (6a)

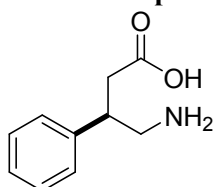

LRMS(ESI<sup>+</sup>) for C<sub>9</sub>H<sub>12</sub>ClNO<sub>2</sub>[M-HCl]<sup>+</sup> Calcd: 180.10, Found: 180.20.

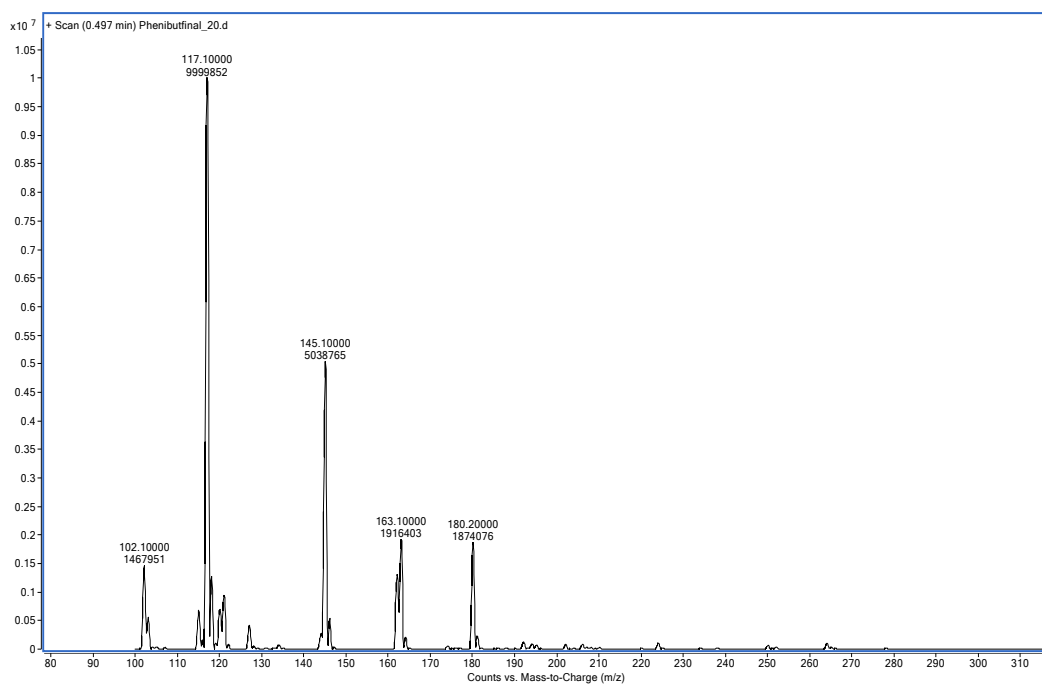

### Reference

a) D. Almaşi, D. Alonso, E. Gómez-Bengoia, C. Nájera, *J. Org. Chem.* 2009, **74**, 6163; Manzano, R.; Andrés, J. M.; Muruzábal, M.; Pedrosa, R. *Adv. Synth. Cat.* 2010, **352**, 3364; T. Okino, Y. Hoashi, T. Furukawa, X. Xu, Y. Takemoto *J. Am. Chem. Soc.* 2005, **127**, 119; b) X. Jiang, Y. Zhang, X. Liu, G. Zhang, L. Lai, L. Wu, J. Zhang, R. Wang, *J. Org. Chem.* 2009, **74**, 5562; c) K. Murai, S. Fukushima, S. Hayashi, Y. Takahara, H. Fujioka, *Org. Lett.* 2010, **12**, 964; d) Z. H. Zhang, X. Dong, D. Chen, C. J. Wang *Chem. Eur. J.* 2008, **14**, 8780;

### Computational Results of DFT Calculations

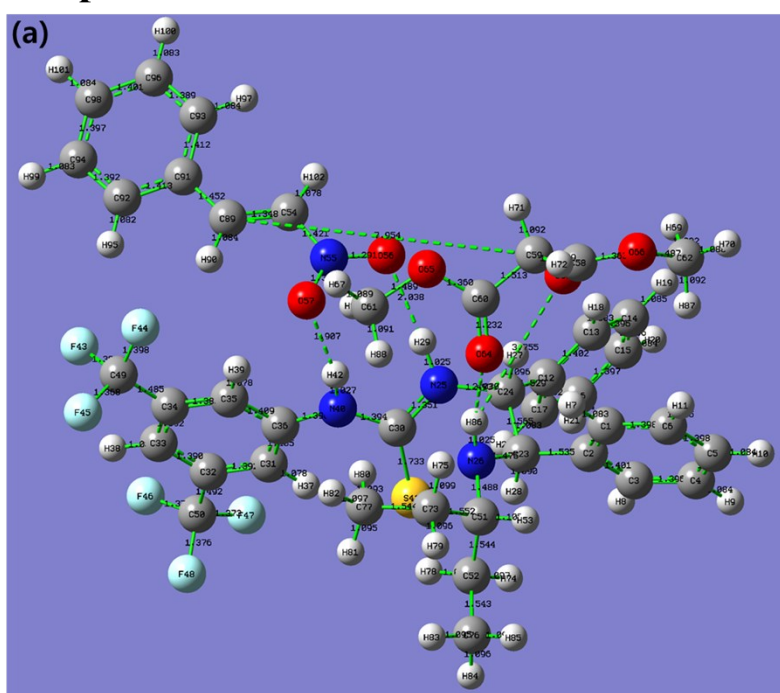

EE + Thermal Free Energy Correction = -3238.1132 Hartree

Symbolic Z-matrix:

Charge = 0 Multiplicity = 1

|   |          |          |          |
|---|----------|----------|----------|
| C | -5.33711 | -0.08333 | -0.70798 |
| C | -4.72135 | -1.02586 | 0.1279   |
| C | -5.51868 | -1.76266 | 1.0133   |
| C | -6.89867 | -1.55921 | 1.07397  |
| C | -7.50509 | -0.61787 | 0.23886  |
| C | -6.71919 | 0.11811  | -0.65341 |
| H | -4.73363 | 0.48762  | -1.40337 |
| H | -5.05033 | -2.48933 | 1.66779  |
| H | -7.49909 | -2.13674 | 1.76786  |
| H | -8.57853 | -0.46829 | 0.27377  |
| H | -7.18386 | 0.8388   | -1.31898 |
| C | -2.9338  | -0.26512 | 2.45144  |
| C | -3.75437 | 0.77022  | 2.92218  |
| C | -4.19836 | 0.77645  | 4.24606  |
| C | -3.82396 | -0.2487  | 5.11685  |
| C | -2.9988  | -1.27758 | 4.65522  |
| C | -2.5541  | -1.28801 | 3.33176  |

|   |          |          |          |
|---|----------|----------|----------|
| H | -4.03055 | 1.56771  | 2.24277  |
| H | -4.83319 | 1.58249  | 4.598    |
| H | -4.16747 | -0.24451 | 6.14539  |
| H | -2.69769 | -2.07416 | 5.32663  |
| H | -1.90844 | -2.0797  | 2.97249  |
| C | -3.20633 | -1.2666  | 0.06213  |
| C | -2.48133 | -0.23616 | 0.99211  |
| N | -0.99641 | -0.29233 | 0.84397  |
| N | -2.61133 | -1.11652 | -1.28117 |
| H | -2.74189 | 0.75401  | 0.60178  |
| H | -2.98563 | -2.26917 | 0.42831  |
| H | -0.56858 | 0.63787  | 0.79514  |
| C | -0.18634 | -1.35201 | 0.62177  |
| C | 2.66837  | -2.759   | 0.53669  |
| C | 3.99338  | -3.17489 | 0.43045  |
| C | 4.95985  | -2.43177 | -0.23688 |
| C | 4.55404  | -1.24579 | -0.84343 |
| C | 3.23731  | -0.82429 | -0.77574 |
| C | 2.2671   | -1.55091 | -0.0567  |
| H | 1.95611  | -3.35578 | 1.08281  |
| H | 5.98924  | -2.76103 | -0.25801 |
| H | 2.95373  | 0.10153  | -1.24978 |
| N | 1.01068  | -0.94656 | 0.03609  |
| S | -0.52506 | -3.00617 | 1.01752  |
| H | 0.98595  | -0.0188  | -0.40362 |
| F | 6.65534  | -0.13394 | -0.79247 |
| F | 5.00054  | 0.84     | -1.90119 |
| F | 6.00521  | -0.95891 | -2.7311  |
| F | 5.70532  | -4.47832 | 1.40104  |
| F | 3.60848  | -4.79195 | 2.1146   |
| F | 4.23635  | -5.52715 | 0.12821  |
| C | 5.53917  | -0.40499 | -1.57066 |
| C | 4.37989  | -4.4893  | 1.02004  |
| C | -3.11363 | -1.9956  | -2.37435 |
| C | -2.88937 | -3.48069 | -2.01725 |
| H | -4.1966  | -1.8546  | -2.54344 |
| C | 2.61735  | 3.11021  | 0.76577  |
| N | 1.49806  | 2.39657  | 0.25834  |
| O | 0.42029  | 2.41708  | 0.96884  |
| O | 1.59968  | 1.73911  | -0.87499 |
| C | -4.38872 | 3.42936  | -0.55237 |
| C | -3.77799 | 3.89739  | -1.86294 |
| C | -2.78778 | 2.87011  | -2.36843 |
| C | -0.54584 | 2.58424  | -3.25711 |
| C | -6.39118 | 3.48894  | 0.79468  |
| O | -3.80967 | 2.77871  | 0.31352  |
| O | -3.00092 | 1.65936  | -2.45407 |
| O | -1.62662 | 3.47151  | -2.74356 |
| O | -5.67362 | 3.87113  | -0.45166 |
| H | 0.00666  | 3.19416  | -3.97031 |
| H | 0.08853  | 2.28759  | -2.41958 |
| H | -5.83479 | 3.82882  | 1.67051  |
| H | -7.35234 | 3.9932   | 0.71635  |
| H | -3.25803 | 4.84617  | -1.71271 |
| H | -4.58371 | 4.03977  | -2.58695 |
| C | -2.37621 | -1.55399 | -3.66621 |
| H | -3.4772  | -3.71403 | -1.12144 |
| H | -2.58398 | -0.48508 | -3.80814 |
| C | -3.32068 | -4.44163 | -3.14522 |
| C | -0.85035 | -1.77574 | -3.59636 |
| H | -1.83848 | -3.62522 | -1.75102 |
| H | -2.80053 | -2.08522 | -4.52566 |
| H | -0.46858 | -1.36285 | -2.65898 |
| H | -0.60649 | -2.84291 | -3.61953 |
| H | -0.34553 | -1.2957  | -4.44374 |
| H | -2.68855 | -4.32704 | -4.0323  |
| H | -3.24556 | -5.48219 | -2.81033 |
| H | -4.36109 | -4.25306 | -3.43823 |
| H | -2.64201 | -0.13566 | -1.57936 |
| H | -6.50983 | 2.40432  | 0.82703  |
| H | -0.97914 | 1.70271  | -3.73059 |
| C | 3.84618  | 2.92822  | 0.24133  |
| H | 3.95502  | 2.22227  | -0.57371 |
| C | 5.06835  | 3.55494  | 0.71142  |
| C | 6.3022   | 2.97376  | 0.34353  |
| C | 5.06789  | 4.70822  | 1.5257   |
| C | 7.49728  | 3.52824  | 0.79349  |
| H | 6.31447  | 2.07374  | -0.25671 |
| C | 6.26567  | 5.26153  | 1.95931  |
| H | 4.13008  | 5.17971  | 1.79474  |
| C | 7.48342  | 4.67152  | 1.59638  |
| H | 8.43877  | 3.06905  | 0.51862  |
| H | 6.25807  | 6.15236  | 2.57535  |
| H | 8.41572  | 5.10498  | 1.93821  |
| H | 2.36901  | 3.70152  | 1.63193  |





|   |          |          |          |
|---|----------|----------|----------|
| H | 0.04123  | 4.51796  | -1.35186 |
| C | 4.26544  | -0.28576 | -1.29    |
| C | 4.22572  | 1.14544  | -0.82079 |
| C | 4.56821  | 1.29107  | 0.64568  |
| C | 4.7375   | 2.92229  | 2.43306  |
| C | 4.64749  | -1.69949 | -3.20703 |
| O | 3.88686  | -1.26671 | -0.65063 |
| O | 4.90328  | 0.43526  | 1.44652  |
| O | 4.43663  | 2.63541  | 1.00229  |
| O | 4.70377  | -0.35151 | -2.57827 |
| H | 4.72571  | 4.00802  | 2.50539  |
| H | 3.96979  | 2.47693  | 3.06589  |
| H | 3.61393  | -2.0514  | -3.25435 |
| H | 5.06027  | -1.54879 | -4.202   |
| H | 3.18379  | 1.48158  | -0.92654 |
| H | 4.8667   | 1.77375  | -1.43994 |
| C | 2.18367  | -0.43689 | 3.40528  |
| H | -0.37929 | -2.81058 | 3.05399  |
| H | 3.18799  | -0.39305 | 2.96417  |
| C | -0.02905 | -1.90058 | 4.97584  |
| C | 1.41562  | 0.85014  | 3.0339   |
| H | -0.56352 | -1.06241 | 3.02811  |
| H | 2.30961  | -0.50005 | 4.4922   |
| H | 1.24645  | 0.88668  | 1.95434  |
| H | 0.44438  | 0.89146  | 3.53797  |
| H | 1.9832   | 1.73845  | 3.3396   |
| H | 0.2697   | -0.93946 | 5.40756  |
| H | -1.05152 | -2.1154  | 5.30534  |
| H | 0.6295   | -2.67833 | 5.38147  |
| H | 2.43895  | -1.45817 | 1.07512  |
| H | 5.24493  | -2.40825 | -2.63093 |
| H | 5.71282  | 2.5118   | 2.69825  |
